# Supplementary material for: Effect of transition-metal-ion dopants on the oxygen evolution reaction on NiOOH(0001)
Source: Royal Society of Chemistry journal article supplement (doi:10.1039/c8cp02849d), 2018-01-01
Supplement: c8cp02849d1.pdf [file c8cp02849d1.pdf]

Fe-top-CONTCAR-OOH

1.0000000000000000

5.8948998451000003 0.0000000000000000 0.0000000000000000  
-3.0422965108000000 5.1533943039999999 0.0000000000000000  
0.0000000000000000 0.0000000000000000 36.0000000000000000

Ni O H Fe

18 42 22 2

Direct

0.2807801991796717 0.0125985736089447 0.9962694360745277  
0.7858369377642670 0.0213912738137112 0.9975460528330568  
0.6442559201763597 0.2094248221558315 0.1252507637551758  
0.1443242427435536 0.2096767027929464 0.1254302704375318  
0.3028919471608955 0.3066342622839877 0.5110829795939790  
0.2773602298564955 0.5159387907120851 0.9960754195272653  
0.0409857656115879 0.4123209177042837 0.2530948965400158  
0.5410343352449971 0.4123066940324313 0.2530879293708604  
0.4355825925305990 0.6165084188645630 0.3806634473555799  
0.9358831563535916 0.6171702834142023 0.3808093963552033  
0.8066011045313514 0.8073765170265579 0.5103089991915608  
0.1445264536174259 0.7096840165861353 0.1253899245108001  
0.3060710726861895 0.8033097587434805 0.5097938653384492  
0.6440406172153456 0.7098442008063555 0.1251793297046632  
0.0410571381279626 0.9123418437542461 0.2530605086095464  
0.5410455191347672 0.9123358494332251 0.2530804371895342  
0.4352794596487021 0.1162399115374078 0.3809753774144513  
0.9358195392540885 0.1163083096768057 0.3808042648531731  
0.4377417374209313 0.3391290212860269 0.0209622198534906  
0.9659162183003296 0.3547522063994105 0.0252039510460095  
0.8036602831656865 0.5370698225634848 0.1500213531267367  
0.3054035877378017 0.5368247467300924 0.1501379476788247  
0.2008342414739158 0.7393130716496680 0.2777318741676697  
0.7008648671709019 0.7392014687498131 0.2777825312805506  
0.5960583274884858 0.9436358322190392 0.4056191405793164  
0.0954982165263749 0.9434770346376981 0.4060433489538788  
0.9415517996535034 0.1267089784005335 0.5369853033472981  
0.4999352474136319 0.1442669408704789 0.5391378545366948  
0.4482322758826011 0.8640331183068097 0.0257002046446755  
0.9410504449760591 0.8443747642717903 0.0275754679252704  
0.8342461842254697 0.0575686569556148 0.1554149630253170  
0.3352918568056069 0.0583986628404861 0.1552578522892654  
0.2316732717501114 0.2610182049663521 0.2830763715651851  
0.7315905197847217 0.2611934013636271 0.2830880630045726  
0.6259428530141995 0.4655415089154677 0.4107937478866838  
0.1253100502832867 0.4648558719358654 0.4099906508236414  
0.9786467413671371 0.6424416041945287 0.5416613478158532  
0.4850872108689635 0.6453912685878475 0.5394067630994455  
0.1149402081428040 0.1618661791256027 0.9659638267604005  
0.6217620245443793 0.1892562034943804 0.9641939831657460  
0.4532815923125651 0.3605208901353611 0.0951614924435777  
0.9563813726859605 0.3618621673879130 0.0961331146937466  
0.8502847929940825 0.5635636248964794 0.2230679636863988

0.3504198662816234 0.5634955185996084 0.2231127661354808  
0.2454365397062647 0.7690808138759339 0.3507303620490029  
0.7449871131771276 0.7678533038322090 0.3508205786060807  
0.6336830466916777 0.9690365582885583 0.4783049068416518  
0.1296299286769912 0.9676653367475642 0.4823230254272447  
0.1265401215934678 0.6952689594026787 0.9702930603718416  
0.6070135517321431 0.6791717108651355 0.9681819955596134  
0.4832076274636148 0.8822544646582682 0.1002479118305198  
0.9839657224377992 0.8827013494371665 0.1004462962386406  
0.8813236954793572 0.0856108122222555 0.2284158442793918  
0.3815063082203915 0.0857143945604623 0.2283573780689076  
0.2759333800067876 0.2885850342227956 0.3560747918676875  
0.7751894368425235 0.2896852351758491 0.3560746268888798  
0.6624754348916024 0.4840480667104816 0.4843998912427885  
0.1293530229849082 0.4675480854575869 0.4810920649308570  
0.5691348069514893 0.1312685744201619 0.5776497539077035  
0.6087732743330737 0.6872120819746500 0.9278742011221609  
0.4529538188473239 0.8741215715306548 0.0536591227322944  
0.9576225350639900 0.8609779929171452 0.0556325098683348  
0.8595551192472389 0.0729760887661409 0.1832515255119592  
0.3613766964018061 0.0745479409803828 0.1830883831882530  
0.2570221658981267 0.2769049328258661 0.3109195627594756  
0.7566441689653776 0.2776195768974080 0.3109416891606313  
0.6507309967744457 0.4828781695581385 0.4384998797207890  
0.1381349469846218 0.4734788466512132 0.4381641074587351  
0.9800472317682473 0.6385696008564629 0.5685775783477584  
0.5029520092991031 0.6615016182731043 0.5662153025613547  
0.0895518109140680 0.1112877527291478 0.9399883001066082  
0.6172563304723608 0.1307143348680889 0.9389370917276496  
0.4294596648216997 0.3425815953725223 0.0674376647901088  
0.9515383286065424 0.3521887497739606 0.0678391558875545  
0.8242693554770328 0.5480834048247416 0.1952401714774573  
0.3250664545228178 0.5477523349568095 0.1952708818915257  
0.2202405515636003 0.7531612757334112 0.3228934698658646  
0.7200180791870895 0.7515967071399370 0.3229627535679813  
0.6193524324446810 0.9565997164119627 0.4502062427003056  
0.1126709305042204 0.9577720023688053 0.4545144374730117  
0.7264931178560111 0.1119427412826456 0.5719994381802648  
0.6235149444176153 0.5339642535108048 0.9226532958477949  
0.7975404008173175 0.5121059870635370 0.9997920065273804  
0.8216029008464709 0.3103260064241501 0.5065115262227733

Fe-top-CONTCAR-O2

1.0000000000000000

5.8948998451000003 0.0000000000000000 0.0000000000000000  
-3.0422965108000000 5.1533943039999999 0.0000000000000000  
0.0000000000000000 0.0000000000000000 36.0000000000000000

Ni O H Fe

18 42 20 2

Direct

0.2807840022817558 0.0126892712847777 0.9965447489448209  
0.7846270685335384 0.0191267202449978 0.9976814176039213  
0.6462360411407388 0.2050409371868156 0.1255441033598785  
0.1464318292263300 0.2052969961741979 0.1254278931902491  
0.3093363597269914 0.3028011225776339 0.5090796700807303  
0.2736932717149116 0.5124163063056670 0.9969617733861895  
0.0425678894482573 0.4118795968310565 0.2531656992313529  
0.5425629222760122 0.4118813422091137 0.2531644390728331  
0.4419105089461013 0.6130288169789537 0.3805683841336815  
0.9420099478661044 0.6134518559194717 0.3809035744674887  
0.8148854550114066 0.8025348714581213 0.5094376983265860  
0.1465049685582116 0.7052715827874678 0.1253978112055592  
0.3119061882969874 0.7958368921473493 0.5084090656463616  
0.6462137363769429 0.7055573556600123 0.1252363522326618  
0.0426414339153212 0.9119398088449984 0.2531370533578254  
0.5426313385368999 0.9119598517297689 0.2531484721852948  
0.4415553529651959 0.1129498335517596 0.3810054417012907  
0.9420804740073550 0.1131175186370328 0.3808352711933765  
0.4497624868443921 0.3394627806533990 0.0212147183830922  
0.9478967856561056 0.3440983179786699 0.0263524259196259  
0.8061628085051993 0.5334240164268067 0.1501842751120321  
0.3077029074674442 0.5325190936776210 0.1501812765118871  
0.2025601264508268 0.7389078638921305 0.2778015604235904  
0.7025375248713459 0.7388048486777237 0.2778641910772492  
0.6023618850255943 0.9409219655540255 0.4057594796209116  
0.1018389511729296 0.9397756589603574 0.4060472076042174  
0.9641956047904543 0.1192976574661273 0.5354435822751213  
0.4793690135481654 0.1340915544447441 0.5398815674911361  
0.4470897898134538 0.8566572017216529 0.0254164004960202  
0.9414499009868322 0.8460382327448528 0.0274754097909238  
0.8363706901555972 0.0528446405040981 0.1555458020910194  
0.3367987933526848 0.0540103672720633 0.1553212353603044  
0.2332981548208863 0.2604347191545386 0.2831497926874960  
0.7332700001424186 0.2607274640762682 0.2831739031661229  
0.6315222477306648 0.4618027389920272 0.4109234109069533  
0.1329685090888404 0.4621288931762138 0.4097412044494106  
0.9861735972880084 0.6312449320332760 0.5406874741437520  
0.4957717746173671 0.6494073433891643 0.5389085982592761  
0.1148433854894577 0.1673569125286036 0.9670021899654202  
0.6222236246441284 0.1819638622995541 0.9656014353269171  
0.4565455139901999 0.3564943102456226 0.0952867941064355  
0.9568435281102410 0.3564649228139558 0.0965005361881879  
0.8518693861464470 0.5631301416572683 0.2231758171677285

0.3519928398538923 0.5630115709007271 0.2231832709517789  
0.2516829892348866 0.7660004330992223 0.3507388440335717  
0.7513295158255318 0.7645278461237695 0.3508850078590697  
0.6413984732312983 0.9709709832970859 0.4783181447702916  
0.1351365041637962 0.9564483063554263 0.4807223416084696  
0.1140517707974453 0.6964900705533950 0.9705004526840284  
0.6157300415788356 0.6805254362131237 0.9661100105649751  
0.4852245951603038 0.8776995413808635 0.1002764801184171  
0.9855438682572029 0.8784132887522134 0.1003638241519340  
0.8828244185436063 0.0851916861132267 0.2285086269794832  
0.3829828501149137 0.0853482981461440 0.2284148503966037  
0.2821153367919038 0.2846979199024915 0.3560082967573308  
0.7809994510567932 0.2863150710834645 0.3560954956525535  
0.6604341523687296 0.4752699025960965 0.4848574808894526  
0.1564546760981926 0.4710029575541910 0.4797384412827128  
0.4793373241238896 0.1311487067152797 0.5761521421794953  
0.6168082689350811 0.6833119002526757 0.9298451003267232  
0.4572552054951586 0.8695231920735011 0.0533604107023962  
0.9564467144534206 0.8612669815955414 0.0556148294520256  
0.8615697906378514 0.0692310908777287 0.1833877227888223  
0.3624063399840551 0.0710395908926671 0.1831594655188411  
0.2598092338304454 0.2748879357886977 0.3109878866115068  
0.7594215760746650 0.2759685829169385 0.3110177478448790  
0.6518844776434065 0.4767921392074612 0.4387513645099332  
0.1536628044944948 0.4723746743337927 0.4380557719810199  
0.0051254059541392 0.6374938642762444 0.5675012875715595  
0.5254606380202205 0.6836383091359224 0.5653761429697042  
0.1010573609968262 0.1342783054406311 0.9404409265352882  
0.6229287415252074 0.1742929202589991 0.9386889752613143  
0.4380342404550035 0.3400379978765500 0.0674798488025843  
0.9425963086745099 0.3443070211130461 0.0681436850317994  
0.8261427781151056 0.5464629191188024 0.1953414785903789  
0.3267825987789124 0.5457136043690340 0.1953490973434597  
0.2254247972652337 0.7514652680168084 0.3229183327325771  
0.7253868141837287 0.7493789491828409 0.3230376421431345  
0.6234989067259917 0.9571548381425501 0.4501540262544381  
0.1172048324055694 0.9448841183460175 0.4527695485206920  
0.7997078908834183 0.5081884230536673 0.9997626295843176  
0.8389396997275966 0.3066141470732404 0.5063333931974796

Fe-top-CONTCAR-0-OH

1.0000000000000000

5.8948998451000003 0.0000000000000000 0.0000000000000000  
-3.0422965108000000 5.1533943039999999 0.0000000000000000  
0.0000000000000000 0.0000000000000000 36.0000000000000000

Ni O H Fe

18 40 22 2

Direct

0.2733922936020505 0.0106526277059658 0.9968914315929425  
0.7736311221111194 0.0143680253163367 0.9969301496452090  
0.6390789270742587 0.2034220432566372 0.1256183763025049  
0.1392988056912543 0.2034290553590026 0.1253687971963515  
0.3127825105647304 0.3052217789275389 0.5093845563053492  
0.2708764182136534 0.5125993240924132 0.9966019242898696  
0.0420104546165945 0.4108339665036524 0.2533616611762284  
0.5420241620726500 0.4107890683767579 0.2533608950131949  
0.4416380441906540 0.6148992469071644 0.3810072999687151  
0.9415497931432881 0.6153159435675235 0.3814416335402200  
0.8178236194333408 0.8108594118575141 0.5094533832594479  
0.1391599656676732 0.7033332411302595 0.1255075300678996  
0.3160164778252508 0.8044207778724868 0.5093655716034249  
0.6389103484308478 0.7036591745304364 0.1253483190795492  
0.0419574042674711 0.9108547139137642 0.2533260621726328  
0.5419718596845158 0.9108778162278526 0.2533380380874704  
0.4414936934832454 0.1151259217225586 0.3813857068791222  
0.9420399551046970 0.1153163281620522 0.3812016853525861  
0.4517163546895375 0.3339638895654389 0.0221930966603310  
0.9265037907167724 0.3520232202559512 0.0247245337691950  
0.7989045138333637 0.5311776514710402 0.1502789577068810  
0.2997845784860900 0.5305076940019759 0.1501123097441663  
0.2019534367806557 0.7376014280234884 0.2778627783870391  
0.7019651973555128 0.7375661224603220 0.2778727817605855  
0.6025221461261410 0.9428633988885196 0.4060326787348956  
0.1011559970710607 0.9420777633080419 0.4063193667547935  
0.9859034577309487 0.1284910980855685 0.5358255259276277  
0.4349233838234312 0.8529924361430830 0.0252828991666050  
0.9370230364042555 0.8506185859836748 0.0279788704331381  
0.8301970349676822 0.0521545527432465 0.1554775456952839  
0.3300520257915593 0.0520543185225577 0.1554899215493393  
0.2339851086387696 0.2612064361074005 0.2834053591683912  
0.7339308349021394 0.2613307301655965 0.2834462263343056  
0.6309173223364652 0.4642274214183146 0.4112200279933873  
0.1338388896606872 0.4634466951690754 0.4107639346170728  
0.9836633360736329 0.6322457683246441 0.5414996111293604  
0.5066316706268665 0.6633306941618784 0.5406195243771279  
0.1137185623245358 0.1701263865668565 0.9671679313869532  
0.6089012479928542 0.1750579312265472 0.9641836106374413  
0.4496809413863048 0.3541780408438910 0.0955457112124520  
0.9484124305478048 0.3551815622634251 0.0960251335711533  
0.8500232849330587 0.5601938176688606 0.2233032836836912  
0.3501427363451626 0.5601256431233352 0.2232893494993959

0.2502643926095729 0.7667892917593520 0.3512768914515689  
0.7506764821632359 0.7664361813222627 0.3511892552877853  
0.6473695388508247 0.9810122666003451 0.4787706663273283  
0.1319217778150019 0.9544795201734786 0.4802500797939686  
0.0963106294473732 0.6943101968021210 0.9701656363919469  
0.4781106164175242 0.8765221599671875 0.1004419614357914  
0.9788511861935518 0.8762419023562629 0.1006450045727689  
0.8821312658108482 0.0844295803928432 0.2288274033316497  
0.3821710351370413 0.0843741794799655 0.2288077687761216  
0.2818722439193593 0.2870641302947661 0.3564199342041903  
0.7814793236336612 0.2884545882565703 0.3566027346747234  
0.6493204839371529 0.4857700350441903 0.4844960798562425  
0.1660946910972143 0.4675895269289896 0.4819689813072827  
0.4736090700604123 0.1471348207837764 0.5383459574995797  
0.6189213565948393 0.6722389127410722 0.9677327745375166  
0.4448290788114662 0.8677204056887291 0.0531136847811524  
0.9526113848078239 0.8603410170695085 0.0560645945592029  
0.8572361474490648 0.0690396752975744 0.1832210473581952  
0.3572017329089476 0.0694182404056818 0.1832378577144240  
0.2618789156556431 0.2772044106894285 0.3111960920609818  
0.7616291315859414 0.2780597438107861 0.3112269225450390  
0.6465891424511838 0.4828237369731667 0.4391208978623666  
0.1601548949135250 0.4700837212250946 0.4388193379403305  
0.9944781247329431 0.6280340381533804 0.5682754996061163  
0.5544132440478649 0.7100683218567880 0.5664254656965326  
0.1146978992705669 0.1441915251608208 0.9406305540214888  
0.5969731781029139 0.1604653260170608 0.9373887084276760  
0.4360656634677866 0.3357441622114479 0.0676921294401893  
0.9269007897611417 0.3478320537924660 0.0679632008041366  
0.8212338614412147 0.5430023433173119 0.1955300099912307  
0.3217149253097347 0.5425373072348307 0.1955348851209422  
0.2237623977561469 0.7507597561998622 0.3235243285459362  
0.7247249166844725 0.7502030604237717 0.3234090360138211  
0.6301045364118210 0.9648869447865707 0.4507304374958778  
0.1114803317137643 0.9451728140081244 0.4522867347441490  
0.4377987654772326 0.1458625961538544 0.5646399031823819  
0.6498484132714282 0.6763653186211442 0.9412530468602469  
0.7868537756100551 0.5138926650387461 0.9986553184824203  
0.8306274649470922 0.3103716720380731 0.5074254108633838

Fe-top-CONTCAR-0-O

1.0000000000000000

5.8948998451000003 0.0000000000000000 0.0000000000000000  
-3.0422965108000000 5.1533943039999999 0.0000000000000000  
0.0000000000000000 0.0000000000000000 36.0000000000000000

Ni O H Fe

18 40 20 2

Direct

0.2627258188811865 0.0021167185194528 0.9983130758936696  
0.7623071127935859 0.0021016024126510 0.9983839331218078  
0.6524809569134078 0.2074009982794252 0.1251606688262044  
0.1523044147388433 0.2075127820266331 0.1253123822799012  
0.3277960388240402 0.3049240803382602 0.5087696700106790  
0.2646676144982933 0.5082334072036616 0.9974626367226804  
0.0436650397492997 0.4110694396926107 0.2531956740129999  
0.5436739924301648 0.4110671112469504 0.2531865070273938  
0.4378207664364382 0.6101419165944861 0.3809718501414494  
0.9376531260984322 0.6102598187350807 0.3811190995589371  
0.8301444610510202 0.8108880102244242 0.5078871144714512  
0.1523489051523654 0.7069269124397479 0.1252083501135104  
0.3296617940725213 0.8109772038987799 0.5079307158180413  
0.6521026607705025 0.7069887455955879 0.1252269428710449  
0.0437016166039186 0.9111372617836935 0.2531725499287205  
0.5436867156936458 0.9111126794396682 0.2531808095636521  
0.4378177911574923 0.1106814772414779 0.3810918939485219  
0.9380563208790988 0.1106248865675639 0.3810661313221217  
0.4130300387924493 0.3261639511595220 0.0226042401659328  
0.9306534900787042 0.3271713872445901 0.0226965856281609  
0.8123671212366332 0.5343195821290578 0.1498749601848814  
0.3124696591169780 0.5343851830239501 0.1500087295409998  
0.2034060084800942 0.7379029105858521 0.2778629104559158  
0.7034477695359129 0.7378957881050709 0.2778585129032862  
0.5979479500990266 0.9376358057807863 0.4058174622511430  
0.0977839513657202 0.9375298462583004 0.4058131084252068  
0.9968308676890985 0.1258630553008402 0.5340104556119201  
0.4498549651269244 0.8583289735116324 0.0280304799344435  
0.9412451192496931 0.8400493886080440 0.0286204133855037  
0.8431970147930059 0.0559696803191230 0.1553187242952347  
0.3434564139070559 0.0561492365466023 0.1552563988537514  
0.2342381345290008 0.2597603406116562 0.2831978603725958  
0.7342294915997698 0.2597708618919583 0.2832113367411395  
0.6284832045032047 0.4599961662456025 0.4109883118826971  
0.1301365684110820 0.4601052742152163 0.4110334126236310  
0.0079490828650535 0.6467079007091172 0.5393414961682126  
0.5179386163472159 0.6669868776937093 0.5387115513957212  
0.0745576053530499 0.1458221777853836 0.9675559545631103  
0.5847792368911797 0.1664460237979739 0.9668635465391091  
0.4601765480645525 0.3576847664091787 0.0952134059599175  
0.9619722661839347 0.3576080369477452 0.0952922910445864  
0.8532177521962794 0.5621858022331310 0.2231649923876944  
0.3532068593707507 0.5621907876895875 0.2231890693786482

0.2464097941006145 0.7615524943077645 0.3510486214270259  
0.7467816439176858 0.7617691198782310 0.3509803005649985  
0.6507586538534369 0.9727713522347372 0.4776438813596897  
0.1424399909991791 0.9550467457330569 0.4781986148538877  
0.1176999021837233 0.6881946810987003 0.9721691248945774  
0.4924147449312528 0.8802042504398813 0.1005000027092251  
0.9920607390299665 0.8798603312780102 0.1004985771340685  
0.8841473534044297 0.0845580795581569 0.2285133323009205  
0.3841758936894948 0.0845319728811873 0.2285062610502848  
0.2778832196473218 0.2832292363704383 0.3562805276817116  
0.7778644611900773 0.2831893722301402 0.3563935392143875  
0.6618868763570802 0.4859786723879296 0.4835365382076944  
0.1794415512654837 0.4870501205292754 0.4836269755874909  
0.4746184834486584 0.1248522736592506 0.5340872024087204  
0.5954968864721621 0.6872256835160755 0.9722255686853671  
0.4726751682291876 0.8747169928817513 0.0560407059086216  
0.9652362362421627 0.8589712850264775 0.0567102322414712  
0.8677589786765267 0.0722445780101495 0.1831534653378313  
0.3681810030742554 0.0724706838176559 0.1830867985607441  
0.2592623876077980 0.2743394374543087 0.3110381110011389  
0.7592447718639264 0.2743385113646752 0.3110422562700776  
0.6485828668773621 0.4780534721849463 0.4390638563603986  
0.1607274400718239 0.4775646303400549 0.4388900720635860  
0.0428714330338593 0.6939756622735729 0.5653717098730127  
0.5564544164487160 0.7187423309902812 0.5645897381832299  
0.0362402921395812 0.0933315229122869 0.9416941769195191  
0.5503050468527420 0.1189030146565671 0.9408367672729909  
0.4301956583856494 0.3385546154693202 0.0673527804720564  
0.9425442051836654 0.3380098547255059 0.0672370883816811  
0.8288731544944881 0.5458539544121663 0.1953391025341062  
0.3288994544560708 0.5458982801480019 0.1953505670493669  
0.2212378955041743 0.7468871337181326 0.3232147324812900  
0.7216594671776591 0.7470391616071481 0.3231426703215021  
0.6261343363626040 0.9554294609317751 0.4495400324360759  
0.1190745611411756 0.9401955228247232 0.4501850841577166  
0.7664268869068778 0.5116136449229955 0.9966103205426862  
0.8258532342485125 0.3012669321809085 0.5096146782246080



Fe-top-CONTCAR-0-H2O

1.0000000000000000

5.8948998451000003 0.0000000000000000 0.0000000000000000  
-3.0422965108000000 5.1533943039999999 0.0000000000000000  
0.0000000000000000 0.0000000000000000 36.0000000000000000

Ni O H Fe

18 40 24 2

Direct

0.2939693887084101 0.0179754531127371 0.9955876294122190  
0.7963468183871734 0.0207820753727800 0.9968203708657921  
0.6511685643292713 0.2071006446318097 0.1255799242433821  
0.1509508275304150 0.2072754995663195 0.1253653195480056  
0.3109375437406624 0.3090838031585057 0.5074439913246260  
0.2891732502467369 0.5175757932326299 0.0002306952199361  
0.0509835078844525 0.4139963876105183 0.2531763071927349  
0.5510552092924270 0.4140048941484749 0.2531677511122798  
0.4475668099070761 0.6180021425147766 0.3806214193935135  
0.9479570882562862 0.6183932963441656 0.3810956605679945  
0.8115364983709782 0.8029832586215547 0.5103966365080477  
0.1513677060144860 0.7076405067280745 0.1251568954589850  
0.3094163692431876 0.7978729169724580 0.5082413517243999  
0.6511257524594530 0.7079146197927687 0.1249572709329742  
0.0509000082747409 0.9140298406757356 0.2531565423364402  
0.5508983858796025 0.9140207194618967 0.2531681787541896  
0.4471724932770849 0.1176941234151208 0.3813509439151067  
0.9478177438247402 0.1178472168505710 0.3811684406743757  
0.4638317832904623 0.3399000840532216 0.0206623044416378  
0.9623495185846805 0.3356028499760534 0.0282043107276575  
0.8111068934399008 0.5366190041439357 0.1501324667719096  
0.3128424934704236 0.5348935946122664 0.1500662668160689  
0.2105692009608605 0.7409973838304871 0.2778046700287199  
0.7105555104434036 0.7408837222835033 0.2779193861015082  
0.6078615372313730 0.9461163963124840 0.4063185126412160  
0.1074641006658328 0.9443634422826443 0.4065797814869170  
0.9594657492737121 0.1176482132156692 0.5376284697067371  
0.4599702939784154 0.8651836536244405 0.0248639886747541  
0.9508524959668773 0.8450394397337555 0.0265237423526004  
0.8407418421267002 0.0537368167753626 0.1555228334667982  
0.3417746864216433 0.0556305263048445 0.1551678949823177  
0.2417491020856683 0.2625471716906437 0.2831588000783804  
0.7415584767502436 0.2627015199823468 0.2831928355156333  
0.6369865426626985 0.4668378502710354 0.4111103044548541  
0.1395462616584528 0.4673781738215194 0.4094260739774375  
0.9813426158566609 0.6254495537528990 0.5416054127506343  
0.4892001104190908 0.6507886020811027 0.5394699989007991  
0.1270454820578197 0.1624630891426528 0.9646634914511699  
0.6445169225400269 0.2051014312069596 0.9642870557622129  
0.4614848262574736 0.3585153326992210 0.0951806643878435  
0.9610530469633876 0.3580254000609646 0.0969465264597016  
0.8601139464622061 0.5651217934405686 0.2231489121350761  
0.3602844601735740 0.5650178765501779 0.2231498766055463

0.2579236767354939 0.7718536722090534 0.3508645352978452  
0.7571771258986928 0.7697766825025057 0.3511513995309551  
0.6423096330593761 0.9738387968616268 0.4791374505197211  
0.1358601124059174 0.9601937389920099 0.4819830426261359  
0.1321558735141507 0.7028563247422720 0.9685400277438286  
0.4903818837772252 0.8799972569112438 0.0998149662451692  
0.9904805706008158 0.8809745137521807 0.0999206808324925  
0.8909181767362976 0.0870221316661611 0.2285133106935937  
0.3910550854501275 0.0871442069006093 0.2283944267522432  
0.2879415425950290 0.2886485216510362 0.3561213246574189  
0.7867025336032899 0.2909627249194701 0.3563013911358848  
0.6635220250509207 0.4794899184174270 0.4851840338146469  
0.1631660644970255 0.4802852835050122 0.4781851739702964  
0.3847537154823124 0.1501443285376934 0.5677577667930610  
0.5570972035942572 0.7129063912026031 0.9468540276748902  
0.4711466698301467 0.8805716773298324 0.0529288318338307  
0.9631248249094848 0.8636065248009347 0.0547468860622473  
0.8667053433699415 0.0697126929049189 0.1833314861721863  
0.3679197436596696 0.0722520283265815 0.1829907007160762  
0.2676058508588864 0.2776990943459338 0.3110030316170604  
0.7670281550336618 0.2790639579996301 0.3110237683964593  
0.6565131379181407 0.4834946774922364 0.4388974411001664  
0.1613332653739999 0.4804923497236019 0.4380024661704947  
0.9658209796439965 0.5790662943001028 0.5676704308233806  
0.5202922821745268 0.6457849747584228 0.5658217774422993  
0.0818821870457971 0.0733121974565677 0.9408417211034814  
0.6856442853665465 0.2014650912699200 0.9383020232351122  
0.4436016333301608 0.3391849707980089 0.0674686395071754  
0.9491964369222817 0.3397361893602736 0.0683447224722669  
0.8335723605798488 0.5493009484609641 0.1953254723433207  
0.3343082575851614 0.5481666743451825 0.1953366073513054  
0.2323065315236482 0.7565127555473840 0.3230485865118968  
0.7321647664384263 0.7540741235906638 0.3232991781783862  
0.6240158072559899 0.9591044388933410 0.4507890858049453  
0.1201539783607951 0.9483741934809209 0.4539227556273307  
0.1977166908989681 0.1117812291304658 0.5635922240597346  
0.3697092606513933 0.9868899439345118 0.5752716537784663  
0.3832389006296980 0.7148623555836052 0.9473400115035151  
0.5105440743373098 0.5364920065402037 0.9399501640356897  
0.8211745192521593 0.5068470706956505 0.0020467688436009  
0.8466029606796927 0.3134508130995990 0.5043003151583048

Fe-top-CONTCAR-0-0

1.0000000000000000

5.8948998451000003 0.0000000000000000 0.0000000000000000  
-3.0422965108000000 5.1533943039999999 0.0000000000000000  
0.0000000000000000 0.0000000000000000 36.0000000000000000

Ni O H Fe

18 38 20 2

Direct

0.2861581868452051 0.0194312475724564 0.9952230402255773  
0.7932827809132513 0.0277407731530725 0.9993044312187348  
0.6477470323948176 0.2057046075621504 0.1255002324806901  
0.1477755902889421 0.2063557573429030 0.1253189257027529  
0.2945879680960393 0.2976946644741296 0.5085654654895808  
0.2736300457450037 0.5174084128744093 0.9974499662163698  
0.0433933787762635 0.4118485876816500 0.2531296058633421  
0.5434530316046851 0.4117857425049387 0.2530986141724635  
0.4404726370887810 0.6122599508917171 0.3804517225776732  
0.9410442021040296 0.6129604106275435 0.3810382873185381  
0.8039685294777936 0.7952810704543417 0.5107668396437302  
0.1479769883532649 0.7061941988996694 0.1252423615737460  
0.3020454192454969 0.7865187050002195 0.5067869007546275  
0.6476608330494380 0.7065046240621883 0.1249869440262217  
0.0434757550056557 0.9119628489800414 0.2530929026018797  
0.5434012055079436 0.9119051515155927 0.2531080406737350  
0.4403100758137974 0.1122476511326859 0.3812005341778925  
0.9408751230176030 0.1123134582914453 0.3809143040270987  
0.4559578577650482 0.3492820174425231 0.0191599095524618  
0.9568627072742645 0.3461230102143528 0.0284884778087780  
0.8076323315345787 0.5353563803600400 0.1500933164639837  
0.3096540810935769 0.5331228911663685 0.1501361141591096  
0.2033548506388823 0.7389780665013648 0.2777307818605122  
0.7033030308539475 0.7386635692910331 0.2778687704544998  
0.6010961297876741 0.9405398377905194 0.4060875560881638  
0.1006956843800772 0.9391187558259325 0.4064083496285112  
0.9481146122545588 0.1115259950065862 0.5369173515930281  
0.4514152708629338 0.8591295755612263 0.0246221855171932  
0.9506792448352022 0.8525733155929328 0.0271747532658372  
0.8367745806521757 0.0523569856418015 0.1555239120923932  
0.3382593650412176 0.0549742009997318 0.1550436306726890  
0.2342925487858949 0.2602301725327051 0.2831009760841116  
0.7339579170324209 0.2606135417910151 0.2831438653387441  
0.6295104085567396 0.4607644001750263 0.4112164064457094  
0.1321148411329771 0.4612825756356168 0.4091256582370061  
0.9831008280356721 0.6286422644067010 0.5411793944808222  
0.4817516783465586 0.6443214978199907 0.5398770700564696  
0.1152818166339093 0.1716061339920724 0.9658456275758321  
0.6300253283163145 0.1838453042083736 0.9653945969764824  
0.4585929260201395 0.3583378120269265 0.0949013144535423  
0.9581566123509695 0.3572362967077931 0.0970543395078150  
0.8528484841803506 0.5632355920503147 0.2231173825432197  
0.3529732806225223 0.5629391267215605 0.2231466110806349

0.2510632343401586 0.7665931004280105 0.3507241641189887  
0.7501367712137356 0.7637545839078551 0.3510620859745153  
0.6352276355557707 0.9642148953273129 0.4784304502735614  
0.1281522344687847 0.9530400444268865 0.4817882446592727  
0.1157567409990347 0.7032565403119677 0.9690773879597736  
0.4860944424051352 0.8772584996432525 0.0999113210452831  
0.9872258519051561 0.8802727076065343 0.0999542637874275  
0.8835214028851042 0.0850370979003827 0.2285084928511000  
0.3838062563447230 0.0852312783839794 0.2282941145184594  
0.2810645738787011 0.2829206973540285 0.3559655598488098  
0.7794315630935680 0.2859065209960733 0.3561425786269458  
0.6490682788030279 0.4654924246646810 0.4868752137663592  
0.1532859051792080 0.4682792871005367 0.4776473320903468  
0.4588811131863707 0.8655687875588244 0.0526916336200828  
0.9638192754691011 0.8672473998962509 0.0555739449891641  
0.8616043342990424 0.0681652033572513 0.1833507330301715  
0.3636597600685710 0.0716811919727015 0.1828887456119811  
0.2603167583203620 0.2740699850470208 0.3109486046813428  
0.7592936396017336 0.2760047527910398 0.3109920641420336  
0.6468308982150397 0.4741294325134630 0.4389187000087869  
0.1529454198345003 0.4715606357375415 0.4377601740756659  
0.0079922463791071 0.6270938586258772 0.5677649075358767  
0.5145379358811767 0.6835024013045076 0.5661529389106006  
0.0995324619094845 0.1358472340872796 0.9394063872377169  
0.6413926303520189 0.1820612182764765 0.9385619707414468  
0.4394450989692567 0.3439595442840801 0.0672511770593347  
0.9465621499463825 0.3444607879616712 0.0683671258358897  
0.8272824787247706 0.5473093436177416 0.1952773187463469  
0.3280440500274799 0.5458636837269600 0.1953080910372618  
0.2253013829214825 0.7523193423203033 0.3229046388827124  
0.7250990783346857 0.7488763471219451 0.3232008509422368  
0.6185240351780121 0.9522001424719422 0.4499952519534769  
0.1151155679690883 0.9470159561548618 0.4537071449734689  
0.8121333688100746 0.5113237376533016 0.0017371976495820  
0.8380162212135460 0.3024140719837666 0.5044619261317821

Fe-sub-CONTCAR-OOH

1.0000000000000000

5.8948998451000003 0.0000000000000000 0.0000000000000000  
-3.0422965108000000 5.1533943039999999 0.0000000000000000  
0.0000000000000000 0.0000000000000000 36.0000000000000000

Ni O H Fe

18 42 22 2

Direct

0.2858002490763880 0.0106586766409080 0.9965135705856554  
0.7901930416617661 0.0277073655775126 0.9964917252995987  
0.1552424164294095 0.2156364469937699 0.1251486065956939  
0.2965319606019534 0.3030245991024927 0.5092670819717426  
0.2821530748789414 0.5120160318812451 0.9966893596073376  
0.0406075621144026 0.4232911077754836 0.2535057441558308  
0.5407983636902430 0.4233422886987697 0.2534248857584985  
0.4284849009193081 0.6179484466566907 0.3815202525180866  
0.9288368700043250 0.6186723544571892 0.3815662768594237  
0.8018641457679009 0.8009888954338606 0.5091503714088716  
0.1544582334466469 0.7152840629946907 0.1252982787377661  
0.2996696483772965 0.7932800498392751 0.5086188761294180  
0.7958851532893477 0.5211618950196594 0.9985250101497272  
0.6546693625493489 0.7156821131639788 0.1251244492431951  
0.0403514506141391 0.9229366302314118 0.2537440221070426  
0.5403393670352229 0.9230975794087541 0.2536172336940795  
0.4285968696520115 0.1185584604700054 0.3817126334035877  
0.8083250431307363 0.3016252901517404 0.5068707032510461  
0.4518311194069469 0.3352777521228419 0.0214033362531580  
0.9571925622563667 0.3624889721066751 0.0233017907857800  
0.8230802275204071 0.5579009923750177 0.1510155015551007  
0.3166031000975238 0.5383355772911713 0.1502001650553879  
0.2007943722431946 0.7499387448768289 0.2784737041315709  
0.7006054607729909 0.7505154176933786 0.2785530432920851  
0.5765894121971725 0.9382522475937449 0.4072350881920599  
0.0968731019168061 0.9403456000000290 0.4076795082335423  
0.9357147785222466 0.1190160580262187 0.5351545132560318  
0.4798092605984011 0.1164683472115371 0.5367458758425485  
0.4582360999830754 0.8545946372067520 0.0255305157560457  
0.9593736723847428 0.8641005508006857 0.0263693932798788  
0.8359785341915468 0.0668514045357753 0.1557654113752136  
0.3303423711313727 0.0592378777511584 0.1562550107914333  
0.2329896676443895 0.2728973199106832 0.2834288658102722  
0.7308563749688304 0.2724934929016882 0.2833163447459980  
0.6191970215477909 0.4705114448727272 0.4115060594027682  
0.1098046443052567 0.4545336748489320 0.4113871915056322  
0.9872242537972014 0.6441509476905409 0.5397498626172066  
0.4825295543474085 0.6368587371146575 0.5389294918210297  
0.1175990058557943 0.1734772837161387 0.9658963824869532  
0.6001699835113142 0.1649406058104148 0.9617008225017186  
0.4746371380763322 0.3638591287175359 0.0944769989572833  
0.9808044852749803 0.3729767747473716 0.0944636126341223  
0.8506850266195727 0.5760540672927590 0.2236768181423301

0.3502612804803746 0.5741945470987274 0.2235179397359772  
0.2394759746166813 0.7678517180694158 0.3516042125577953  
0.7467193763116454 0.7832141364258903 0.3511368075604225  
0.6125477909765705 0.9502759582951512 0.4787684562211539  
0.1240607295874199 0.9613252740596466 0.4810865524407149  
0.1202915803765165 0.6888276796127641 0.9719882803644707  
0.6187520769626714 0.6694080100628738 0.9693911946235048  
0.4840949586831869 0.8724997570500933 0.0992951786478713  
0.9932411255470440 0.8926071281180653 0.1001821088694186  
0.8801974891074239 0.0955435007323544 0.2287760889705837  
0.3788750889031292 0.0948089977758642 0.2288259507711032  
0.2812653781428409 0.2978163226712383 0.3559055643167639  
0.7600280266535505 0.2969786166540800 0.3558627444608575  
0.6569988826071338 0.4799813338730630 0.4840013000932331  
0.1344609268532579 0.4806329401237193 0.4816700969275942  
0.5567229556846768 0.0974786389830910 0.5741719573714407  
0.6133921447032548 0.6139322131672033 0.9301306201131609  
0.4646558426831504 0.8608747849997656 0.0535233528240085  
0.9744814886615812 0.8766854449121696 0.0542520600037548  
0.8586070564274876 0.0807010753082906 0.1837496028981249  
0.3444210625961475 0.0732342711443010 0.1842632773388004  
0.2641398814594070 0.2908708419592045 0.3112201696411461  
0.7496826430127754 0.2908115593978877 0.3113457290731674  
0.6453099442510251 0.4849977384863778 0.4395391584418036  
0.1261318730729002 0.4740863961545259 0.4399477129026935  
0.0197157640327390 0.6637739688608590 0.5663468126954855  
0.5025176089882634 0.6589563732526642 0.5656571767066441  
0.1095470311026645 0.1614088794991773 0.9390306087953846  
0.5586251469695186 0.0584027568985803 0.9394813666477689  
0.4566824415602256 0.3470062243251633 0.0664270861156879  
0.9763815828354295 0.3715900607068789 0.0661394877102310  
0.8320185924515897 0.5678027209476255 0.1956170285969776  
0.3277863057802576 0.5543700966200477 0.1956682345513414  
0.2165876251541263 0.7540271983112561 0.3236780896281459  
0.7224665871376104 0.7650532044070247 0.3230891472482966  
0.5870216844086826 0.9353256322777881 0.4505523593501621  
0.1092759790567754 0.9456692546090223 0.4529561781452643  
0.7278391360033608 0.1001305432588708 0.5669806999983323  
0.6169880683940718 0.4494743926666516 0.9322574061418862  
0.6549203821129267 0.2151705874428345 0.1250867395807660  
0.9292315692388868 0.1187391690670410 0.3814812600162938

Fe-sub-CONTCAR-O2

1.0000000000000000

5.8948998451000003 0.0000000000000000 0.0000000000000000  
-3.0422965108000000 5.1533943039999999 0.0000000000000000  
0.0000000000000000 0.0000000000000000 36.0000000000000000

Ni O H Fe

18 42 20 2

Direct

0.2883647624891971 0.0144974265335703 0.9977766547523854  
0.7958083150502107 0.0288023618815487 0.9986038008598426  
0.1507569352030405 0.2054393876862688 0.1250485621780042  
0.3013482835952550 0.2939094302671225 0.5072172559037732  
0.2781088369583392 0.5154045178191847 0.9986621012882237  
0.0432419096563721 0.4155599096765467 0.2532427850387459  
0.5433982834063679 0.4156140979518673 0.2531740541522772  
0.4411950720552169 0.6155668018532023 0.3815330157629847  
0.9422251006324034 0.6150722703364255 0.3814968205309902  
0.8071739201618879 0.7954435648557345 0.5079292441646828  
0.1499186268157602 0.7041489053457070 0.1250146606536230  
0.2994028874058105 0.7806516197119594 0.5072147219105463  
0.7941835757336968 0.5159522278520189 0.9982824292825687  
0.6506329620714518 0.7047023596159238 0.1249760429760910  
0.0431065040191624 0.9151814005321255 0.2534844238234878  
0.5430655458460562 0.9153118785512457 0.2533760229046090  
0.4416461276763176 0.1162152926149197 0.3814486622357428  
0.8173059269135055 0.2942212066020552 0.5066352651051839  
0.4414695557521904 0.3458497025883409 0.0221440703690260  
0.9468938720772130 0.3497308891995096 0.0264123643915138  
0.8204184380774709 0.5481418716691139 0.1508585698810640  
0.3132401652510046 0.5272075283989542 0.1502204916117513  
0.2036154969944102 0.7423577757381457 0.2781491439500419  
0.7033178357144549 0.7426449335258187 0.2783476811251873  
0.5919072799806183 0.9403120442811113 0.4074123781089981  
0.1088232370143107 0.9372117134848433 0.4074749076787709  
0.9589415951438222 0.1199665760687647 0.5328596010502861  
0.4571703692627356 0.1193770313679634 0.5388311895357434  
0.4601557426996926 0.8341810629029333 0.0265959559031498  
0.9709634609719575 0.8656245164483570 0.0261241244938168  
0.8291627505138357 0.0541437234921434 0.1557204768093449  
0.3259972833206056 0.0486752829163175 0.1557941502895499  
0.2357538372179752 0.2653812823047302 0.2831827274212654  
0.7338578403375008 0.2651110795622114 0.2830600828664905  
0.6320166049063741 0.4656016975464529 0.4112752379107678  
0.1271225513277685 0.4523715998133364 0.4110165823640720  
0.9704459822383351 0.6028847775362440 0.5383779971912128  
0.4916835569353116 0.6419803264580113 0.5376061602605166  
0.1244693053055660 0.2038940202028401 0.9672374266467677  
0.6037108859361328 0.1671563374172372 0.9680846553860583  
0.4722798597016973 0.3551425511101974 0.0944272639973851  
0.9773241566006855 0.3619280829848109 0.0947775837890286  
0.8531416025060398 0.5680885744149199 0.2234187613171210

0.3525503723715285 0.5662257543909877 0.2232666344992204  
0.2517238946202532 0.7668014409190587 0.3513688025645743  
0.7570685761823894 0.7796474108590042 0.3513477492398998  
0.6336707381175712 0.9743803798556459 0.4791205533155110  
0.1248487881668719 0.9437305458353991 0.4798340252680389  
0.1366166838510763 0.6902905507492741 0.9726797802991320  
0.6369419990470104 0.6900413738424882 0.9671788973754204  
0.4794072717621511 0.8600661637061122 0.0989057348930625  
0.9888236311517560 0.8831276930726756 0.0997004336109439  
0.8827411977561427 0.0876533860441200 0.2285779250425064  
0.3817610695232049 0.0872401679674774 0.2285072908595159  
0.2939453097171532 0.2942018882499819 0.3555579050866250  
0.7732027401056207 0.2941280019331661 0.3554842899085365  
0.6536929591476528 0.4642487411595797 0.4835707119688308  
0.1507737602302406 0.4615031328629542 0.4785593857255963  
0.4488075392249358 0.1222673166394584 0.5750509576744622  
0.6458424804568438 0.6881703123002266 0.9308904253335019  
0.4610527656610333 0.8284682191818316 0.0550260947346820  
0.9860445440309293 0.8803081172384774 0.0542585026002452  
0.8530154130529766 0.0684985424248776 0.1836608385016071  
0.3418636829704336 0.0632663209646593 0.1837815381970412  
0.2690504145387836 0.2843798900095051 0.3109307180144123  
0.7557218655628204 0.2846518697501096 0.3110540811676463  
0.6517064246289169 0.4737434214814746 0.4393652478487343  
0.1450311494065934 0.4608258127503305 0.4416284550507737  
0.9781923783986558 0.5729990365558133 0.5647641302037566  
0.5218824039802266 0.6755282410487690 0.5640864180171944  
0.1167014538448731 0.2290528737099176 0.9406952165313770  
0.5736453421343500 0.1323895925525564 0.9416239956457019  
0.4526435184739529 0.3469010866393805 0.0662735150163753  
0.9668945335492600 0.3564807058933133 0.0653490998641553  
0.8331540508900391 0.5591033157863239 0.1953775663603056  
0.3284265651373980 0.5451678225281893 0.1954197405728904  
0.2260635917061233 0.7516608520342186 0.3235339025655556  
0.7297784709950310 0.7598048163727834 0.3234133818106084  
0.6185028746846365 0.9710138323063954 0.4506921123855379  
0.1124687841017528 0.9312848546148609 0.4514241736508265  
0.6521519231419961 0.2052761745444308 0.1247347206362957  
0.9436220081990576 0.1189706131034902 0.3814191230861467



Fe-sub-CONTCAR-0-OH

1.0000000000000000

5.8948998451000003 0.0000000000000000 0.0000000000000000  
-3.0422965108000000 5.1533943039999999 0.0000000000000000  
0.0000000000000000 0.0000000000000000 36.0000000000000000

Ni O H Fe

18 40 22 2

Direct

0.2760778266490475 0.0091704195760280 0.9972659177743615  
0.7801646193429672 0.0193103567490981 0.9971826666163263  
0.1485556770400842 0.2075131404420665 0.1249785805793040  
0.3093504728646202 0.3037474004639520 0.5091079337246799  
0.2731460119209202 0.5124256904309886 0.9969437812547421  
0.0413890351244080 0.4140763769422933 0.2533415929582600  
0.5415792122589284 0.4139985111986145 0.2532615244232263  
0.4352287514735831 0.6099821695629054 0.3812788187365638  
0.9353539311108209 0.6102307255765616 0.3815120033617310  
0.8139239640579092 0.8091339120531820 0.5091898764365990  
0.1477354075018079 0.7067241206991790 0.1253525152158287  
0.3067772276314409 0.7958022248655089 0.5096407470260964  
0.7816064568850996 0.5145030620652803 0.9974230022578697  
0.6481677500416503 0.7068911809908369 0.1251834782630102  
0.0412950644664263 0.9136364005963394 0.2535480701548924  
0.5413270888730203 0.9138623266328475 0.2534473324434101  
0.4352391051091855 0.1098808480901895 0.3814115050515540  
0.8171791420908771 0.3043298824291704 0.5090759676804495  
0.4443330164000978 0.3335311699024692 0.0222646157060345  
0.9355643569118237 0.3541323321902037 0.0236504487195356  
0.8165415208267619 0.5489495909120773 0.1510875724407782  
0.3100193811719914 0.5302825528571545 0.1501430453690474  
0.2017050674009055 0.7406362787688692 0.2783129153552846  
0.7016662927167174 0.7412727215860042 0.2783380359018074  
0.5839652040174480 0.9308483473858110 0.4066991274618492  
0.1031092833190317 0.9316214062180215 0.4074251023965034  
0.9740352477569190 0.1349269711557401 0.5341839636356953  
0.4495363867685808 0.8439784391933408 0.0264040529180270  
0.9606599302878633 0.8650026171137166 0.0264150050991326  
0.8315335366835349 0.0595044380143926 0.1556264014435648  
0.3254670991038303 0.0508805163961769 0.1562538293103003  
0.2338889045251107 0.2636056953759616 0.2832605034756567  
0.7318873067143020 0.2632714421659539 0.2831758460964114  
0.6245667409393346 0.4623110040947090 0.4113063073880207  
0.1164698448526156 0.4440224346303577 0.4115026659059083  
0.9805399245864829 0.6382233235767413 0.5420728025136458  
0.5004543037671065 0.6543102105917424 0.5402741111776683  
0.1092075844345641 0.1820722875877954 0.9655686475696138  
0.5888537286075954 0.1604868879807357 0.9658869740291078  
0.4662863236088753 0.3548456758630158 0.0945226048212488  
0.9719850765198297 0.3655539691161831 0.0942308172129163  
0.8510575026326304 0.5664854600338735 0.2234982800809569

0.3506430102215565 0.5651059155507449 0.2233516457913860  
0.2451136781966410 0.7581905090095511 0.3514744125390795  
0.7535834440245318 0.7746215583778314 0.3508241926632515  
0.6351453138738474 0.9671480038822995 0.4797079213585470  
0.1291548815445144 0.9532873742411350 0.4805629729265713  
0.1082322006912387 0.6901306557800294 0.9714253121930712  
0.4779499624050790 0.8643273403624411 0.0996486615187916  
0.9868953264335817 0.8837958647915273 0.1002162763562427  
0.8814298829859937 0.0867125457341425 0.2285806463728526  
0.3800136512473194 0.0857163272807150 0.2286949212119474  
0.2877971435088307 0.2893263350988085 0.3557152306912914  
0.7671635913582109 0.2892712825568245 0.3556735397664724  
0.6555206335321315 0.4810085426211150 0.4848170003448979  
0.1447254845629306 0.4581137364104036 0.4830292934346062  
0.4795511802869293 0.1465830822797204 0.5371695719059878  
0.6209531914196508 0.6761229398648239 0.9690940629340681  
0.4565771173341753 0.8466001362123147 0.0543512540495490  
0.9799384571410280 0.8776546078943341 0.0542649287708869  
0.8565366426164678 0.0734364088902894 0.1835739456589852  
0.3419095630102388 0.0648814349088959 0.1842360459536062  
0.2664613020732286 0.2817108895272062 0.3110139003952587  
0.7525728191531637 0.2821320636543196 0.3111799909101758  
0.6462975076992173 0.4787568365110513 0.4391493262376873  
0.1335077281194484 0.4511473946373920 0.4398228275502289  
0.0063328247839622 0.6478567641193046 0.5687102534107047  
0.5425288230841063 0.6882002071549241 0.5664527178461265  
0.0963149155254236 0.1790870640113055 0.9387421478265254  
0.5443975470229707 0.1175052296004264 0.9399198267848828  
0.4502343397018525 0.3410656676037167 0.0661210600362152  
0.9598223254962078 0.3637821571907080 0.0656131853571557  
0.8302933232175062 0.5580660383895213 0.1954515296302806  
0.3262811601349190 0.5458629199333990 0.1955110912421157  
0.2206335433528482 0.7437933417920269 0.3235656228081341  
0.7278076002105268 0.7561860808476943 0.3227954281989458  
0.6140764813303732 0.9524877111967397 0.4519683391707306  
0.1121795040512903 0.9381033246255279 0.4524024771905996  
0.4992913291647245 0.1847917682339122 0.5635468482421231  
0.6353898525628588 0.6614509012041762 0.9424778314329971  
0.6488397054255316 0.2077793289167536 0.1248948078440913  
0.9354926874982397 0.1098750880259096 0.3811201864553060

Fe-sub-CONTCAR-0-O

1.0000000000000000

5.8948998451000003 0.0000000000000000 0.0000000000000000  
-3.0422965108000000 5.1533943039999999 0.0000000000000000  
0.0000000000000000 0.0000000000000000 36.0000000000000000

Ni O H Fe

18 40 20 2

Direct

0.2641932710692984 0.9999432866669247 0.9977225615819075  
0.7643921939683196 0.9997170276182422 0.9975864397305634  
0.1535706048516673 0.2087265509417099 0.1251701398950833  
0.3280299574885202 0.3061135381346461 0.5089273893448797  
0.2665942756151667 0.5061502034407832 0.9968134424201709  
0.0417277832895953 0.4121775251909349 0.2532260980317290  
0.5419049342937722 0.4121244615471884 0.2532095227114623  
0.4368894831676816 0.6093772244489258 0.3812017205572739  
0.9367837088222646 0.6093418091509342 0.3811927247935292  
0.8299092457345177 0.8117228236138784 0.5083899056027608  
0.1535454177537404 0.7086524158665763 0.1252231114332874  
0.3298830085152348 0.8120051059299970 0.5086037145974649  
0.7662778584153992 0.5058776960690605 0.9970058487758473  
0.6534239808642033 0.7085851912453797 0.1252284824486992  
0.0414717993797669 0.9117131858618456 0.2535268496626931  
0.5415115196940335 0.9117225670254226 0.2534014501359616  
0.4369961265400625 0.1096360413786170 0.3811226736235185  
0.8278654553662063 0.3062521488582923 0.5089680379879760  
0.4254964550945084 0.3299412306966676 0.0215201021051825  
0.9267437346572844 0.3304581894434153 0.0211995246720599  
0.8229284306535573 0.5512616339700869 0.1509493493167550  
0.3144902066087248 0.5315188838172199 0.1501249435383574  
0.2013969101978911 0.7385115794133293 0.2781493910487314  
0.7013845821619148 0.7392101636394146 0.2783318586617162  
0.5831323627063451 0.9287604490887401 0.4066438234376702  
0.1050581422613353 0.9290049148188664 0.4066728898083715  
0.9879252156057089 0.1326335065988131 0.5331957096300807  
0.4532288897108421 0.8509351543552853 0.0273316093665199  
0.9534276423347229 0.8524467300237353 0.0276687428395250  
0.8364318630409592 0.0610545253430278 0.1557231491410676  
0.3301511858699025 0.0524649578466098 0.1563572655848732  
0.2349248782966175 0.2618353129789343 0.2832143540459255  
0.7325879679780769 0.2613650517578108 0.2830457964499598  
0.6279394298655373 0.4622718675296874 0.4112407100594418  
0.1202811359228367 0.4442998008820759 0.4115573173292377  
0.0188820537506513 0.6604718421961031 0.5394681276458635  
0.5193228216414904 0.6606922976427870 0.5393485196029438  
0.0752274819449208 0.1501759383755124 0.9666513131985407  
0.5751085244444433 0.1507450460793856 0.9667096403833680  
0.4706481373632888 0.3562758810517961 0.0945493392980839  
0.9772196544415904 0.3650656606481558 0.0939088551243439  
0.8511002045866788 0.5649906822742207 0.2234531885504777

0.3508729287459734 0.5630831672194111 0.2232922732261341  
0.2456161902974827 0.7564663328435537 0.3511845871191535  
0.7535476621703356 0.7746476025407665 0.3509044721515254  
0.6387222489616520 0.9590106332579404 0.4786129729010943  
0.1406983938493674 0.9587770823063837 0.4786861551890921  
0.1058349641120016 0.6799920490997686 0.9726383581838435  
0.4840821458976692 0.8659617399631981 0.0995095508730968  
0.9923319796315774 0.8856433943553929 0.1003211139199283  
0.8820323522498016 0.0847650500718296 0.2285537626375475  
0.3804518241597658 0.0836309752457428 0.2286729069936504  
0.2908850043403186 0.2904462292271274 0.3555901117918719  
0.7690012199034548 0.2901240374610854 0.3555515939474557  
0.6690917663274044 0.4824494184089992 0.4845974887018700  
0.1689327206071973 0.4826179356423904 0.4844665637963011  
0.4880460208759774 0.1327963019599452 0.5333946417690354  
0.6066124703185035 0.6793588105730073 0.9726440531024093  
0.4717808204939868 0.8579557673959314 0.0554288425234324  
0.9764845018711703 0.8716053579245883 0.0555721074636837  
0.8602956103189923 0.0737236541270624 0.1837321445604549  
0.3451829216021978 0.0650730417626138 0.1843765960697003  
0.2682901468700081 0.2814437430188283 0.3109483327126678  
0.7539982865084817 0.2817869349804024 0.3110155136176655  
0.6530402410370417 0.4775921888358747 0.4391282733501907  
0.1470666854337065 0.4647156377329971 0.4395906540340830  
0.0557466025117041 0.6984675351436171 0.5657315381013630  
0.5572325316701239 0.6993057286231416 0.5655800025504234  
0.0369960847267866 0.1079880948877896 0.9405022533111159  
0.5371698390844234 0.1112952913323791 0.9404971134823388  
0.4472983074215849 0.3431563270664967 0.0665113326816862  
0.9626760739269258 0.3517558405664899 0.0658935624396732  
0.8321055855435020 0.5583457808958643 0.1953975335627828  
0.3275591839914481 0.5450354622021355 0.1954300707112667  
0.2194184963304192 0.7413651749021071 0.3233251902292563  
0.7253424633187316 0.7548159790800255 0.3229035552736146  
0.6059509256261225 0.9388433143134268 0.4508395672367948  
0.1204378868869993 0.9379255216359457 0.4506605499595093  
0.6537689939546273 0.2090847248341738 0.1251251904631068  
0.9370993544533233 0.1099279611005678 0.3811440661872809

Fe-sub-CONTCAR-0-H2O

1.0000000000000000

5.8948998451000003 0.0000000000000000 0.0000000000000000  
-3.0422965108000000 5.1533943039999999 0.0000000000000000  
0.0000000000000000 0.0000000000000000 36.0000000000000000

Ni O H Fe

18 40 24 2

Direct

0.3026546543889969 0.0224653764681520 0.9958482645532583  
0.8206578972164090 0.0392005549975613 0.9977440482666747  
0.1626461588604657 0.2143140311014917 0.1250869690521563  
0.3004906707293173 0.3046730965297305 0.5059602179498872  
0.2982491707595853 0.5338324414794305 0.0003238398632292  
0.0494824998137152 0.4212651118868143 0.2530623571575316  
0.5496625273995757 0.4214947557122590 0.2530381166385387  
0.4424072498321419 0.6204520009742351 0.3810512058418733  
0.9456728588581650 0.6205764082328534 0.3813689517751443  
0.8066840108290020 0.7969866161388105 0.5100349814620148  
0.1622840339083817 0.7143007900044680 0.1248638888521291  
0.2974486391567734 0.7888508893016039 0.5087981019994667  
0.8106295996588263 0.5168168015915606 0.9990743253114075  
0.6624051782906559 0.7145512431308290 0.1246690569483136  
0.0492388914811266 0.9209045893844555 0.2532765904695939  
0.5493207458813822 0.9210915837217210 0.2531671257328923  
0.4442824673900249 0.1215097716752995 0.3814975452961731  
0.8110370229707977 0.2968019561035413 0.5087224886561059  
0.4510913431721654 0.3481945968858276 0.0203632556858647  
0.9876908000269236 0.3613425902922408 0.0264770319848801  
0.8320164328597087 0.5574996159766150 0.1506200884965086  
0.3253564667844568 0.5371038528956550 0.1499701376214019  
0.2095953202761540 0.7479577630813827 0.2778749314473997  
0.7093803645346153 0.7483746104466958 0.2782080475222649  
0.5956047663468462 0.9476276108791929 0.4073810433482600  
0.1113609100168572 0.9440178126297394 0.4074016394307015  
0.9771735901015265 0.1104650897333604 0.5372302019848498  
0.4843768490801787 0.8768958167658771 0.0257587169493561  
0.9694644554574224 0.8573149986668283 0.0251060163434941  
0.8371032803084205 0.0616593930697788 0.1558054619570038  
0.3356879809842306 0.0599691026216989 0.1556640855069855  
0.2410389443786133 0.2703319116312974 0.2829724231287271  
0.7394369724644103 0.2704273854517593 0.2828694584421317  
0.6347543011996253 0.4715779978019208 0.4112420994455529  
0.1323637317865455 0.4622188677832556 0.4095169236963006  
0.9649520252092706 0.6229106574793565 0.5405655154371872  
0.4705486486149102 0.6324157884092184 0.5399355205206841  
0.1276854113678645 0.1466874052338879 0.9600609712220392  
0.6461288461210724 0.1910306942405260 0.9661687016479559  
0.4866462769451136 0.3648272521654700 0.0939551826420174  
0.9926135982354531 0.3693022074751282 0.0950686488769577  
0.8597222059432372 0.5739982609943075 0.2232537978274267

0.3594253087411872 0.5722723825300901 0.2231107549436190  
0.2554162534147066 0.7749317987485470 0.3509103935407795  
0.7594782794804261 0.7845337012895508 0.3517209029839582  
0.6353934839766232 0.9606808723608234 0.4820451977745613  
0.1399095284132843 0.9616672131009741 0.4810372883446352  
0.1566959688736099 0.7047268348546416 0.9705949567780001  
0.4914824377343084 0.8719220126938186 0.0986737392755445  
0.0003846966285560 0.8920424104417091 0.0996440978870966  
0.8888327438454008 0.0933043965081739 0.2284264178667186  
0.3879686237322444 0.0932614776014073 0.2282718028634840  
0.2935893693643211 0.2942321086243603 0.3554250196705108  
0.7754361110571862 0.2979606491159540 0.3554124755169093  
0.6452894099467889 0.4782992487228788 0.4838154916127686  
0.1379121230576382 0.4698810130294453 0.4791825996670364  
0.4076218933720160 0.1295621963094670 0.5618042958109458  
0.5334040436129552 0.6411773331105775 0.9481314751779398  
0.4838365202733531 0.8734021710676377 0.0540631915975820  
0.9800775654203456 0.8726200983995844 0.0530288843597358  
0.8594503483363946 0.0749134635707602 0.1837701564378866  
0.3498639911700878 0.0736309357061032 0.1837281478645081  
0.2710553498267563 0.2861057712594636 0.3107919188336639  
0.7606204408754916 0.2884890398567193 0.3108418669304652  
0.6507416599406112 0.4846218675579178 0.4395004369029563  
0.1414842436946049 0.4733271756016814 0.4504890685964461  
0.9422317482811472 0.6014692425853829 0.5672181744590762  
0.4742516218729226 0.5922336465066005 0.5659315586824171  
0.0544940938388303 0.0163578378410769 0.9404492965238932  
0.6665365944445476 0.2039282913696862 0.9394051635717922  
0.4640074702594116 0.3504974518982172 0.0660622588635288  
0.9980115218531219 0.3653015727611231 0.0659866873475653  
0.8411063489046839 0.5662019499325776 0.1952111254879078  
0.3369691124655962 0.5525718183899055 0.1952539527629418  
0.2304577902871931 0.7606745312904889 0.3230838020912457  
0.7339756171182439 0.7657337085958759 0.3238157515021428  
0.6187677446719481 0.9529739202931756 0.4541835895935452  
0.1310778763109038 0.9500545553289222 0.4529174089085563  
0.2172480250716836 0.0908750065176043 0.5598806945510720  
0.4039341118551929 0.9775738888163078 0.5722942742093324  
0.4053868317490887 0.7057610558401285 0.9455600266535167  
0.4172715576310381 0.4505423804558598 0.9437672836009254  
0.6634687247924376 0.2143585036112912 0.1247869403695852  
0.9477650061621546 0.1292350458576478 0.3824536705909389

Fe-sub-CONTCAR-0-0

1.0000000000000000

5.8948998451000003 0.0000000000000000 0.0000000000000000  
-3.0422965108000000 5.1533943039999999 0.0000000000000000  
0.0000000000000000 0.0000000000000000 36.0000000000000000

Ni O H Fe

18 38 20 2

Direct

0.3183298020385337 0.0257739496696985 0.9962327672303175  
0.8242769758011974 0.0396679645476965 0.9998787119634898  
0.1592626615416890 0.2033912377004370 0.1256128674942403  
0.2801791538578726 0.2885683885299954 0.5067984513229717  
0.3023773400160437 0.5244347219742806 0.9988978941906765  
0.0350280100630371 0.4137346203322991 0.2531478736495458  
0.5351814446549810 0.4137261814576902 0.2529328287389490  
0.4256923511687276 0.6103265680102723 0.3808014490807849  
0.9287979605100602 0.6103992996630154 0.3812614259095994  
0.7907897869133507 0.7878656908962185 0.5093872770921450  
0.1583268276834389 0.7006902383555058 0.1251102922839920  
0.2839104324784998 0.7743884673137842 0.5064610759220329  
0.8274390785593724 0.5251097235504716 0.9988488758693066  
0.6591782759690687 0.7015986107054744 0.1250861202053315  
0.0349667248487862 0.9133153891778605 0.2532371327235694  
0.5345129322397142 0.9133795950299870 0.2531989262716365  
0.4272368186742952 0.1113389394008948 0.3812863566840932  
0.8055647103274524 0.2892512869823562 0.5069342327090354  
0.4775294252327384 0.3728729447299770 0.0209773760750736  
0.9789617710517504 0.3577740354810928 0.0286487345698063  
0.8294556621499964 0.5421457705395127 0.1511354117223362  
0.3247935001068925 0.5301257600928224 0.1505230233183852  
0.1954763734154099 0.7411079513375114 0.2778067493004741  
0.6951755363262251 0.7403645596404189 0.2783422378307279  
0.5783700597143664 0.9376166153548269 0.4070353924976757  
0.0941882128076301 0.9331992488825236 0.4073877566578759  
0.9465949512968379 0.1034828949988764 0.5353516828988276  
0.4822426712847658 0.8440929571607185 0.0254392046344876  
0.9847361991179113 0.8641313137322228 0.0252013018472752  
0.8195654996495705 0.0396700244041455 0.1566838007146885  
0.3319453940508481 0.0572419295623803 0.1545973005919521  
0.2267358868460789 0.2625855977350540 0.2828987245231076  
0.7239769606438529 0.2626136986579226 0.2828539235116452  
0.6178176421892303 0.4608484228080982 0.4112766651550999  
0.1148796951014646 0.4509251172879516 0.4090954874396147  
0.9620939637199726 0.6168028839924276 0.5396467930098581  
0.4625783145843059 0.6279558541829218 0.5387049000284563  
0.1535355991246163 0.2158832738564627 0.9669836375752396  
0.6534677801206641 0.1894951076757607 0.9670727945549871  
0.4971170935834834 0.3611667278924813 0.0936925158243227  
0.9927343930050156 0.3465895936729240 0.0972051631406643  
0.8458268429780063 0.5660459542155252 0.2233553031454605  
0.3456877818452497 0.5647395114929381 0.2232202977292701

0.2385617774078241 0.7651432458074154 0.3507281020581630  
0.7429416974226228 0.7745052860516566 0.3515320380613502  
0.6195843003531962 0.9562085487272043 0.4799972663853254  
0.1178537854143187 0.9455536311507657 0.4806850849988251  
0.1639572138897023 0.6873156561626672 0.9702520898930231  
0.4871172705411908 0.8597934249608912 0.0986152545462389  
0.9946829983150280 0.8750273174211713 0.0999249569381888  
0.8735618894021968 0.0850546453049787 0.2287927571314725  
0.3734888853176983 0.0860744174755439 0.2278439465193713  
0.2779370028405097 0.2846700917356344 0.3552077753028300  
0.7582298867640418 0.2890881901191946 0.3551466929688516  
0.6312243186409674 0.4597446687044169 0.4850699455644545  
0.1295932944370293 0.4560558317121703 0.4776785545976097  
0.4796839945556002 0.8339863542557495 0.0537214483611876  
0.9855113749816269 0.8674173771917708 0.0532531712544682  
0.8371233749235572 0.0547294548027182 0.1846101652318879  
0.3431005103263729 0.0727618443201195 0.1827731954717891  
0.2571032054877804 0.2780564358816022 0.3107152660030579  
0.7441991530008920 0.2806552853154045 0.3108791793563768  
0.6349480921221726 0.4702840563411499 0.4393368903868549  
0.1294464614073760 0.4578647749144054 0.4486338324284560  
0.9782405700867969 0.6121951468159565 0.5663863734653987  
0.4816637452257950 0.6469826702260448 0.5654541990170614  
0.1312684150860051 0.2559075233033923 0.9415737751428210  
0.6471690736366469 0.1778435314040721 0.9402192877212485  
0.4852932618746095 0.3632958944471838 0.0654681564127415  
0.9899712757211603 0.3529981866903995 0.0574856956666423  
0.8306579361841884 0.5538925113584838 0.1952221043588196  
0.3271120676643307 0.5460458232304504 0.1952234563027702  
0.2141843648625610 0.7517099542090051 0.3228687973114361  
0.7181506746723798 0.7558085199334599 0.3235314902639317  
0.6023832645100597 0.9519531752526049 0.4518894579303563  
0.1087271486811758 0.9376395114912199 0.4523675023520539  
0.6659918410771226 0.2040452162819477 0.1239860458564905  
0.9306273728724506 0.1181030933137208 0.3818155150994187



Co-top-CONTCAR-OOH

1.0000000000000000

5.8948998451000003 0.0000000000000000 0.0000000000000000  
-3.0422965108000000 5.1533943039999999 0.0000000000000000  
0.0000000000000000 0.0000000000000000 36.0000000000000000

Ni O H Co

18 42 22 2

Direct

0.2985620563501147 0.0228505403085823 0.9973457148846524  
0.8112846553349859 0.0386962938708169 0.9985472169003478  
0.6474528491159305 0.2084202390609551 0.1255551262490580  
0.1470942005402520 0.2075957644084671 0.1249166818072927  
0.2997020417815370 0.3071557763060570 0.5091533327657352  
0.2954345356717374 0.5308330710865649 0.9998612825953749  
0.0393850119822459 0.4110100419827636 0.2530319589801723  
0.5394210781001261 0.4110561929919287 0.2530684277744332  
0.4279908054112124 0.6127040178910833 0.3806964424600552  
0.9284584312139674 0.6133142876740033 0.3807422606472010  
0.8060841814710877 0.8059401729616895 0.5091814767454618  
0.1471685020084363 0.7076811705243011 0.1253412318026143  
0.3025531470301540 0.7976057978591141 0.5080767732687156  
0.6471201207898170 0.7080658051492154 0.1250936204399875  
0.0394440986860544 0.9110893917666555 0.2530236238188293  
0.5394738122068669 0.9110878444795815 0.2530015584059538  
0.4280183872406615 0.1128525095700193 0.3809444098332512  
0.9281303421752125 0.1127955447065462 0.3808765030533387  
0.4750583013833221 0.3475730426475578 0.0222909136933119  
0.9526328179252159 0.3691303226876466 0.0263400133399193  
0.8066281933113915 0.5362516109070625 0.1502723172806437  
0.3079395077095126 0.5348806667508518 0.1499486738542582  
0.1992706397201635 0.7380286084754735 0.2776727908124862  
0.6992106638898581 0.7380702225304521 0.2777327516838385  
0.5877122623477984 0.9391416736798309 0.4056651660993909  
0.0886996994214807 0.9401446261849588 0.4058086644771573  
0.9394466535225369 0.1281142133351229 0.5348166875425249  
0.4811867993195733 0.1200735380482491 0.5357397488379843  
0.4662911422531958 0.8765982808827806 0.0260293333657284  
0.9469878427656592 0.8373627442984092 0.0269126637116854  
0.8381113795187903 0.0559341572549277 0.1551950282250481  
0.3371491044845148 0.0562672369107284 0.1551847315906290  
0.2298349965925092 0.2597922935749779 0.2830391909379775  
0.7297217250966330 0.2596787791197898 0.2830290543173603  
0.6193436976794892 0.4622725566227511 0.4109071565028222  
0.1181285369024638 0.4624771899294019 0.4102009433660165  
0.9979590991451761 0.6603847576665242 0.5399639046418016  
0.4842333558688384 0.6398846232713971 0.5388000153115350  
0.1480152599273183 0.1750631585174831 0.9650990297577345  
0.6635092867972162 0.2199787863872003 0.9676366322835330  
0.4592822800676229 0.3597321709230537 0.0953040918455385  
0.9569858710180529 0.3610583473932142 0.0962091490483842  
0.8489313507955840 0.5624376031185353 0.2230953730825113

0.3490821096023894 0.5622044587471919 0.2230421049147794  
0.2383709514702847 0.7653208034016160 0.3506881704141673  
0.7378483358029332 0.7644411704277192 0.3508329454938494  
0.6127977411963069 0.9476951680649154 0.4780294119645498  
0.1277719127044538 0.9689838421286158 0.4803062118303972  
0.1176467655335356 0.7020851225830097 0.9717944500383175  
0.6445809391459220 0.6848448793325549 0.9700638539072139  
0.4866620923058204 0.8814912334717803 0.1001821844544865  
0.9859015365636020 0.8781008125972856 0.1000368468997702  
0.8798969435762084 0.0842683540982589 0.2283350587745083  
0.3798170723774894 0.0843554451351225 0.2283217279976162  
0.2683565076908528 0.2854131229107931 0.3561055397872268  
0.7677041452055923 0.2858954227663493 0.3561001992774326  
0.6615676527853691 0.4816544564535136 0.4845103307798633  
0.1377507931963122 0.4863869458422544 0.4813215323639600  
0.5514012322324003 0.1040621901103784 0.5737606395891106  
0.6067907428772080 0.6305150162452607 0.9305214572430205  
0.4700812319649608 0.8881731488966761 0.0541049628465380  
0.9542267781980330 0.8366360872747560 0.0551774545606778  
0.8630167372189317 0.0715573990186713 0.1830410245971656  
0.3613264783036810 0.0725142433702090 0.1830478800159115  
0.2535906731453630 0.2750944256489503 0.3109067177380602  
0.7533198791197924 0.2752574101407809 0.3108985824441841  
0.6461216258301615 0.4785831025629792 0.4386821209816972  
0.1361261426469766 0.4812139312135754 0.4383728781647916  
0.0421840380983651 0.7007099792096424 0.5660659048523623  
0.4989885981622956 0.6575277598251708 0.5656136121914150  
0.0728784188606585 0.0601046878760072 0.9437244265653347  
0.7001632665555819 0.2708801179658308 0.9416579374351649  
0.4520071220840060 0.3451075279171321 0.0673313305311721  
0.9411986981318379 0.3608991304069454 0.0677362011347602  
0.8240958670489890 0.5470802032243832 0.1952200637353265  
0.3247434386973376 0.5458618591278687 0.1951962523015250  
0.2146936721800952 0.7500516755944833 0.3228214629630528  
0.7143396437636920 0.7488968449559317 0.3229544691579227  
0.5946053572186640 0.9344871921662241 0.4498468707645470  
0.1092362824621884 0.9555732152855693 0.4524404255763405  
0.7239668207402532 0.1098419883725851 0.5678069954583734  
0.4272947261180960 0.4758344692547742 0.9313984240346711  
0.8078545069488102 0.5227174748374900 0.9987353681103965  
0.8136938236602249 0.3041219078200396 0.5055244890660154

Co-top-CONTCAR-O2

1.0000000000000000

5.8948998451000003 0.0000000000000000 0.0000000000000000  
-3.0422965108000000 5.1533943039999999 0.0000000000000000  
0.0000000000000000 0.0000000000000000 36.0000000000000000

Ni O H Co

18 42 20 2

Direct

0.2766604730199480 0.0111267821710084 0.9969300562895812  
0.7835446019898759 0.0192926747774836 0.9984044615595177  
0.6475379157333304 0.2055834916255445 0.1255299045476506  
0.1470808960307824 0.2057378417840028 0.1254600109570169  
0.3071141057792279 0.3003098275054814 0.5079220602040897  
0.2685674236298954 0.5117583505095396 0.9973531140489982  
0.0448921861520748 0.4134928192092103 0.2532432349210549  
0.5449002809950709 0.4134617766904725 0.2532468957352813  
0.4430312964399344 0.6165835263190855 0.3811343932019632  
0.9434643331261161 0.6164532521732100 0.3810814434067090  
0.8146870803131451 0.8010295214569357 0.5086655345279065  
0.1473844492969337 0.7055050714672274 0.1254878541683129  
0.3109933199510457 0.7897802958241773 0.5072002441212797  
0.6471266840264613 0.7058757087841842 0.1253518258764757  
0.0448399562948124 0.9134912370392344 0.2532354966989928  
0.5448394886710640 0.9135089972024620 0.2532349913042954  
0.4431338831360269 0.1166557967642182 0.3812031174190437  
0.9435677943698587 0.1169389317750282 0.3810567046157228  
0.4508123336756528 0.3418410041463431 0.0208945100320593  
0.9443821419138112 0.3406404824442810 0.0265656730466483  
0.8073483387350640 0.5337613224607579 0.1502742689986322  
0.3083741223242723 0.5326450177873718 0.1502254027690765  
0.2046930698814051 0.7404914331706266 0.2778963302377540  
0.7045865171727017 0.7403408496723518 0.2779723789238837  
0.6053278270931821 0.9471635670163892 0.4062243043827315  
0.1029375225859372 0.9428950032589403 0.4062818269397012  
0.9551422063735101 0.1234084448049000 0.5340342440955295  
0.4869021647596194 0.1320641856759356 0.5383561625188740  
0.4435963853146024 0.8552531631680319 0.0257448634112778  
0.9372343705983958 0.8434186143099461 0.0277364095440123  
0.8369899618535639 0.0533186206669637 0.1555972691712661  
0.3381390958356730 0.0548795375584839 0.1553315228527858  
0.2357541052240818 0.2620927345820194 0.2832580051235620  
0.7357466791165821 0.2622491450071142 0.2832495743990724  
0.6332878992252751 0.4644840873755721 0.4111101282158739  
0.1332302235973230 0.4648032821125605 0.4101104968963826  
0.9814034849495175 0.6076896026272671 0.5386047917043644  
0.4985049850268126 0.6462347023892762 0.5376886299793665  
0.1127848343870825 0.1672048010693761 0.9673619867486339  
0.6201759452609686 0.1786319928962120 0.9665840677921982  
0.4579141936108237 0.3572584449067042 0.0953582819949421  
0.9577224144908215 0.3570302683123397 0.0963985273333462  
0.8540287387008080 0.5645468882712816 0.2232377710543300

0.3541583111194026 0.5644054830972319 0.2232429490545701  
0.2535227467717961 0.7696323006859198 0.3510367581212198  
0.7518129383425939 0.7678563523838046 0.3512614682735761  
0.6485573140839335 0.9860153423304236 0.4789278449871188  
0.1326677308035007 0.9535518111210610 0.4804850483158760  
0.1025232364635544 0.6923012857980865 0.9714130483201240  
0.6110786088592322 0.6838486076471998 0.9665727897721546  
0.4858325999070218 0.8777722840816760 0.1003177816984546  
0.9865211834535659 0.8786505157653542 0.1005889072181261  
0.8850859402455489 0.0866369609466175 0.2285741930191780  
0.3852006375794071 0.0867562324036371 0.2284932498939851  
0.2831906145905879 0.2883089570843582 0.3562728693493986  
0.7826918572301025 0.2899406090421222 0.3561927049497777  
0.6668983935326412 0.4699618451457374 0.4844528504985008  
0.1435528588471362 0.4643093015302672 0.4794698094880395  
0.5014200356762663 0.1410424533651899 0.5747533216713619  
0.6131837076093174 0.6891473745160694 0.9304579386794241  
0.4543428105315316 0.8677001714972505 0.0537310673240017  
0.9548165987337230 0.8571021160320971 0.0557899225296938  
0.8626910862074426 0.0702598060986424 0.1834237636279880  
0.3641446257629485 0.0723320769670654 0.1831579433978812  
0.2619921589357149 0.2775764694314350 0.3110814565494554  
0.7618218318807473 0.2784953201512507 0.3110811438028417  
0.6566845248125119 0.4742708952867415 0.4389225772283941  
0.1449371991873844 0.4685632469691577 0.4388784019973537  
0.9786134050271721 0.5657030306981401 0.5647830607560804  
0.5281217868769057 0.6844385640827400 0.5640860573823550  
0.0949460328334981 0.1316894053407739 0.9408576384602799  
0.6251978100263160 0.1845544106372268 0.9396474404372491  
0.4402728980924301 0.3422278231799400 0.0676263651935720  
0.9430897321974323 0.3455336218593997 0.0678392222201421  
0.8280978427244320 0.5476859483154722 0.1954070761179702  
0.3285735424963402 0.5468032745957188 0.1954215282866513  
0.2277660411571100 0.7542127592121892 0.3232239756914136  
0.7256892624025963 0.7520177284875278 0.3234376975286450  
0.6399486774378614 0.9867883464729724 0.4506138764480235  
0.1136724153224050 0.9430369092420434 0.4524257186146710  
0.7923292949760911 0.5063336754056474 0.9998141667882887  
0.8287659885987295 0.3017634973223277 0.5070377775359781

Co-top-CONTCAR-0-OH

1.0000000000000000

5.8948998451000003 0.0000000000000000 0.0000000000000000  
-3.0422965108000000 5.1533943039999999 0.0000000000000000  
0.0000000000000000 0.0000000000000000 36.0000000000000000

Ni O H Co

18 40 22 2

Direct

0.2718831907508275 0.0076176714327190 0.9977383725944194  
0.7747143268718233 0.0178651512394552 0.9977005271959669  
0.6488710802925723 0.2055289751248992 0.1254715843300289  
0.1487220374018179 0.2056050252280741 0.1252912454128392  
0.31301856443350547 0.3091333888493821 0.5090763377031281  
0.2682344671424203 0.5098922766246473 0.9978163413493135  
0.0422650936164786 0.4120993819273622 0.2531484250820597  
0.5423182575847392 0.4120978381505083 0.2531415232335021  
0.4367946801184033 0.6120046463707212 0.3808086622443839  
0.9366399693111873 0.6121711655376957 0.3810041538035662  
0.8165248224516263 0.8133322201646110 0.5089120317776974  
0.1485337381053640 0.7049133177199424 0.1254751094761773  
0.3096643589016068 0.8018277576278834 0.5091637571083040  
0.6488344406755786 0.7052105725686245 0.1253632539659009  
0.0423702938542974 0.9121660715144841 0.2531240893336815  
0.5423134690435559 0.9121422445196359 0.2531253664920072  
0.4365886687598533 0.1118293288453529 0.3809279082008175  
0.9370264169394601 0.1121003362021185 0.3807983696770166  
0.4422773979272635 0.3326518337975415 0.0224473755410486  
0.9260344561613181 0.3488388571552009 0.0248078783486036  
0.8089036248928566 0.5330122494578829 0.1501685541616383  
0.3091775714424401 0.5318628841532843 0.1501319990657848  
0.2021141517677307 0.7390181642049712 0.2778125751524100  
0.7021280322301280 0.7389964038240321 0.2778151596958196  
0.5973023814750462 0.9394194544609960 0.4054665403450813  
0.0966726126236139 0.9388940564230525 0.4058790065667849  
0.9779545738366409 0.1377925327529326 0.5342282598099146  
0.4451503696077310 0.8413170380691282 0.0271934693250557  
0.9593463358685453 0.8687999416914350 0.0273338965136034  
0.8385984840952788 0.0544699313169161 0.1554473297873002  
0.3385670486414085 0.0551606285130717 0.1554062973200132  
0.2329371128055158 0.2607288525618400 0.2831352129745142  
0.7328176841809934 0.2607393294260092 0.2831434800213586  
0.6265635552670475 0.4611766953768281 0.4109382360720205  
0.1266181587742139 0.4595964936911870 0.4105940263978028  
0.9827358331247921 0.6464513812965009 0.5417300790729770  
0.4995166523724492 0.6576199417558327 0.5400270576571630  
0.1044966080568557 0.1826586546456284 0.9663591572000811  
0.5782742819943608 0.1505124889939040 0.9657291586135700  
0.4597602321113428 0.3556650350438915 0.0954084426445334  
0.9584475057470955 0.3563264354408844 0.0957395977282971  
0.8518023857169297 0.5632757066788301 0.2231602584867360  
0.3517830949676650 0.5631799705786449 0.2231601063502851

0.2458851685244667 0.7633436526569709 0.3509022359493343  
0.7464383617471739 0.7634616640443282 0.3508657579040957  
0.6380231923863632 0.9697968340083635 0.4788949668015690  
0.1343095029326236 0.9612283685328862 0.4799768849553913  
0.1022259928828504 0.6866504606257066 0.9721503691948712  
0.4876712388344018 0.8770834737139525 0.1008148837194085  
0.9893685431367417 0.8792355764550522 0.1006612081829559  
0.8827173862241864 0.0854771107801611 0.2284385403809210  
0.3827621180509553 0.0855696490177209 0.2284097040336874  
0.2772722926005429 0.2847964883973404 0.3561452660484292  
0.7764725930397133 0.2854328373456668 0.3561500067096048  
0.6575421228106181 0.4860314267166714 0.4844352387966211  
0.1462181164157741 0.4622023490099635 0.4828464493528556  
0.4835621618235919 0.1499733894358571 0.5370234481047831  
0.6189968721431285 0.6763261359357101 0.9696129051674661  
0.4583778684278882 0.8518448429834821 0.0550442203178321  
0.9803637662556639 0.8797743584862801 0.0552187383192475  
0.8636860376814397 0.0714336447043351 0.1833126994002825  
0.3635804288956521 0.0724611927635266 0.1832797811151181  
0.2583259120892407 0.2754763600155598 0.3109817200784804  
0.7579209910306374 0.2758785110654642 0.3109985915422868  
0.6484053343498388 0.4787960403081612 0.4387611912777061  
0.1444485069892067 0.4640810959097693 0.4386415686592074  
0.0067092073928521 0.6666309950342324 0.5683761673312162  
0.5377014623990987 0.6872393647034086 0.5663413347371390  
0.0949054708783024 0.1875690784385853 0.9395477943701565  
0.5256514738221583 0.0870780441317009 0.9405553529900884  
0.4422048731281762 0.3385254866317454 0.0673320148391880  
0.9357224618515475 0.3493596949051821 0.0672688857796899  
0.8268843943672552 0.5462433983148287 0.1953126643715919  
0.3269520482704422 0.5456062534743396 0.1953192379659257  
0.2207123730724376 0.7485330813821279 0.3230647748824679  
0.7212992988530474 0.7483137362657146 0.3230223344758513  
0.6239008189990046 0.9583816161520318 0.4510621320722592  
0.1135304671330388 0.9493234224715223 0.4520775155053656  
0.4983926643051718 0.1758039781317819 0.5636996827434899  
0.6395582574565921 0.6645902433733398 0.9430775797986614  
0.7801546743140833 0.5149891791824927 0.9985175171828401  
0.8208675075381534 0.3074045345354861 0.5086286461086827

Co-top-CONTCAR-0-O

1.0000000000000000

5.8948998451000003 0.0000000000000000 0.0000000000000000  
-3.0422965108000000 5.1533943039999999 0.0000000000000000  
0.0000000000000000 0.0000000000000000 36.0000000000000000

Ni O H Co

18 40 20 2

Direct

0.2622535446333885 0.0011937106397610 0.9976168361636084  
0.7611710718970954 0.0015573048353801 0.9976074850152017  
0.6555384796826971 0.2089975556574473 0.1250978375616683  
0.1555868694032725 0.2091149291593055 0.1251491202344752  
0.3278314996205793 0.3066892545393998 0.5091322053557192  
0.2632936717615024 0.5063132285210656 0.9970159235102756  
0.0441878560642408 0.4110709218316586 0.2533335789926880  
0.5441714106187661 0.4110579807391161 0.2533303326917107  
0.4353537621691004 0.6084515284706598 0.3811081340228881  
0.9353870941803422 0.6085236537795282 0.3811415097072555  
0.8300399567321577 0.8118334405643353 0.5085004288008150  
0.1553026427797448 0.7087487216313164 0.1252017928855338  
0.3292136807107795 0.8119962033563581 0.5085021517348380  
0.6553295540090929 0.7087621976446599 0.1251984434358917  
0.0442902576351756 0.9113673428654963 0.2532988590853265  
0.5442763688000198 0.9113665647223215 0.2533024238860193  
0.4354555586135405 0.1085782665814321 0.3810977180618806  
0.9354517313116375 0.1085430444252395 0.3810900303232643  
0.4263825362831852 0.3308437044832999 0.0210064960395115  
0.9186436480423765 0.3312271747710014 0.0210480516483216  
0.8147372568108153 0.5353668242958278 0.1497417227432294  
0.3147276998603559 0.5355063965657152 0.1497605209322401  
0.2036702478135979 0.7379655616061314 0.2779537192799069  
0.7037165083431844 0.7379906382581325 0.2779481218591613  
0.5951243350129616 0.9349899564213047 0.4057161332457397  
0.0953272351311796 0.9353950195243215 0.4057010587572094  
0.9864285873185352 0.1319453421889492 0.5331675242666023  
0.4497143813559106 0.8504758475134722 0.0276856482298911  
0.9562620345702300 0.8638341273526393 0.0279039753365993  
0.8467148913356510 0.0579966926374311 0.1552018072100623  
0.3469440317424315 0.0581936704738553 0.1551847371266248  
0.2354777169632811 0.2600615702357416 0.2833788061991243  
0.7354461504469043 0.2600241382189310 0.2833815673049358  
0.6261677527284064 0.4576554581797723 0.4112582413904065  
0.1262346460281378 0.4574215500005607 0.4112609488359737  
0.0231968222770362 0.6702813550561757 0.5400264701729043  
0.5175163371425384 0.6591862565131876 0.5394418478792815  
0.0746761180094211 0.1558437344469965 0.9668171873154705  
0.5662883810586194 0.1392263093179196 0.9658138795573237  
0.4641812579924718 0.3599258889013939 0.0949636710778208  
0.9641025466507500 0.3596541649054288 0.0949521744445931  
0.8533610323268945 0.5622641188504787 0.2233377804211258

0.3533593339904328 0.5622663095150813 0.2233334755008443  
0.2445186140231996 0.7594352535785163 0.3510652468934481  
0.7445863777674475 0.7595564297973780 0.3510453197013135  
0.6366650468876145 0.9525502911756121 0.4783247761054881  
0.1412258986738024 0.9616082826934402 0.4784106342120111  
0.1008316360280475 0.6803737260842055 0.9730064205979829  
0.4957543472845387 0.8818838524047692 0.1005797751881801  
0.9962375827385657 0.8825466522797996 0.1006523122768002  
0.8849026891580323 0.0846017817078533 0.2286998368797910  
0.3849059791731406 0.0845937666493484 0.2286969645387984  
0.2756968986365393 0.2818001678078801 0.3564445225767585  
0.7756307967611704 0.2817520049676929 0.3564747904598065  
0.6707713095780221 0.4830341853082132 0.4850089823404176  
0.1667054555785938 0.4825773366435442 0.4851018244621201  
0.4883942060659479 0.1324289928334821 0.5331706939848857  
0.6064679270406259 0.6801061288057113 0.9730612683801638  
0.4744059596579859 0.8667720784577497 0.0555184669012334  
0.9820886598594498 0.8792623827682746 0.0557114602889754  
0.8708990994281933 0.0741004625220256 0.1829927039398882  
0.3712406344144625 0.0743956509749850 0.1829727038475895  
0.2599929467931759 0.2743086581565706 0.3112359735992456  
0.7599265749392501 0.2743035805152232 0.3112357372732575  
0.6510586004004466 0.4727901251030815 0.4390466102623947  
0.1508320440151749 0.4724281810952462 0.4390449726446661  
0.0685214733161175 0.7295707959261222 0.5655263315050121  
0.5525531802638071 0.6933588942606050 0.5658035527306140  
0.0414848325478872 0.1256863123848149 0.9403609971303624  
0.5164139580946028 0.0748807734111736 0.9405917314143011  
0.4401766064727823 0.3436263971047211 0.0672004887897089  
0.9387081195588678 0.3434694161186584 0.0672020825213266  
0.8291915050150180 0.5461272050512633 0.1955520318007942  
0.3290786315292493 0.5461076579797037 0.1955472582489435  
0.2199842074108176 0.7450860268896875 0.3232135994142311  
0.7200291751264700 0.7451914331358509 0.3231930792703466  
0.6117066562230491 0.9377773250112114 0.4504494253194622  
0.1163507537097388 0.9460793625874686 0.4505621019769421  
0.7639146774286516 0.5075623461055656 0.9966795944758147  
0.8273204105410557 0.3057683475043405 0.5093955808029875



Co-top-CONTCAR-0-H2O

1.0000000000000000

5.8948998451000003 0.0000000000000000 0.0000000000000000  
-3.0422965108000000 5.1533943039999999 0.0000000000000000  
0.0000000000000000 0.0000000000000000 36.0000000000000000

Ni O H Co

18 40 24 2

Direct

0.3141001343691254 0.0226820829382251 0.9949416086678129  
0.8264366910135146 0.0307416999576772 0.9973813629275328  
0.6714551568834094 0.2120320664689630 0.1253029759468112  
0.1711750350939676 0.2120381627961029 0.1251203683956239  
0.2681957095227434 0.2922920711291963 0.5133319779587733  
0.3141578059234192 0.5324795281950725 0.9992673700534971  
0.0611129388590104 0.4127366765730525 0.2530018119165261  
0.5611768934133452 0.4126796136264370 0.2531296750154023  
0.4369593719966818 0.6121341122155843 0.3805029166374477  
0.9430453581125358 0.6130740916856845 0.3811080519012160  
0.7750213684728307 0.7956941979292268 0.5125433781518819  
0.1716617422699244 0.7125257632547716 0.1250519714011729  
0.2658942486873804 0.7766004005825963 0.5070715195475672  
0.6713694898564937 0.7128458832668051 0.1248239830008536  
0.0610509914306800 0.9127241557212969 0.2530416309253227  
0.5614726374296276 0.9126433802597652 0.2530912454910501  
0.4400503615821746 0.1137997592366157 0.3809927397936602  
0.9420432300375317 0.1156662112170737 0.3810607830115323  
0.4873249771282190 0.3516327123048845 0.0186747374976029  
0.9894977334079039 0.3502784192411700 0.0273085447710833  
0.8308878764857490 0.5407982760751783 0.1499329933726569  
0.3328000757529666 0.5393357867594462 0.1498015814582706  
0.2215463042429405 0.7401209875518541 0.2775319818238292  
0.7213692473320008 0.7388926279265503 0.2781688438639174  
0.6019518658373112 0.9406432217642741 0.4054609412744192  
0.1037493373980669 0.9399397692894363 0.4060242790198985  
0.9037482466279327 0.1460656793887909 0.5369054171760712  
0.4857864948427671 0.8767890069816168 0.0245144464373761  
0.9718504034063027 0.8467834821744651 0.0263628349772795  
0.8603789635730069 0.0587588355809938 0.1553278495654893  
0.3617838787000100 0.0610079618004931 0.1549360495589548  
0.2507806455451008 0.2611493179500854 0.2829851926572078  
0.7509872766227852 0.2614648244576110 0.2830347356742249  
0.6137039915452156 0.4568808720509849 0.4117388281179979  
0.1248979434021801 0.4720982180894878 0.4085441242293534  
0.9887240457815041 0.6959649634381293 0.5475845397828716  
0.4410014259160696 0.6428615232160937 0.5412497139268907  
0.1469830999792788 0.1570117111119681 0.9625434057496380  
0.6678046975700103 0.1964780645205238 0.9649477489669787  
0.4826016810094799 0.3640269346105252 0.0947792333178405  
0.9820335502478730 0.3634734851946296 0.0965761910416563  
0.8707466575660361 0.5643796653014614 0.2230917578102083  
0.3716347236839838 0.5641976479043840 0.2230576916444173

0.2672796673585826 0.7748654082422238 0.3498809626685914  
0.7592068680824761 0.7576152751561871 0.3521314330229518  
0.5972813786476774 0.9405487316119422 0.4773266778303467  
0.1101528077321051 0.9612904193260587 0.4834485316421429  
0.1445279065451506 0.7061694094263021 0.9688833974488424  
0.5106866656114889 0.8852585598102620 0.0996971545522515  
0.0107340727050117 0.8856318605740960 0.1000094213561112  
0.9010873784109533 0.0857022851359134 0.2284384505806956  
0.4017172900705727 0.0863033695923618 0.2282338290586249  
0.2780851743221825 0.2851131611960691 0.3560239487389660  
0.7783850918335308 0.2890204031959531 0.3562387457842568  
0.6206137222231197 0.4489396674185128 0.4887372984218080  
0.1250194521088517 0.4583931214956752 0.4771830458733669  
0.3617661009903586 0.1415249859384181 0.5641797808573032  
0.5582929303139952 0.6865775975047567 0.9446671688081770  
0.4909617888402739 0.8863562838280238 0.0525781464460251  
0.9819586752747128 0.8630012209658832 0.0544233991153708  
0.8838073327291196 0.0731173072010271 0.1831765140744899  
0.3856349914551479 0.0763355312810798 0.1828076171257886  
0.2708651767484509 0.2764094908838121 0.3108992802587248  
0.7721106425813155 0.2787384232129616 0.3108978920532685  
0.6188011767019294 0.4632221286583598 0.4395016351360728  
0.1339173756326125 0.4697348426191841 0.4479721120981748  
0.9129953958752577 0.5322678094129381 0.5610606764719661  
0.4550505244875291 0.7023719169004635 0.5666624397593976  
0.0806777606327685 0.0380311335574334 0.9414748766114887  
0.7150879813371374 0.2229912941669700 0.9388611719135477  
0.4659793651461350 0.3480849922845066 0.0671850461603499  
0.9718339883057575 0.3511963786440699 0.0680445439141017  
0.8465815076954636 0.5499097748434231 0.1952259418869341  
0.3483893304886448 0.5490227568299738 0.1952010362373963  
0.2485474819491376 0.7610457069764008 0.3219387128484233  
0.7416382141293371 0.7410984902575228 0.3241024657627524  
0.5962343365543492 0.9340347510690256 0.4490543981118665  
0.1094965777166060 0.9636685806687008 0.4557857581322417  
0.3172500132558559 0.2476418426624568 0.5795415531841998  
0.1989655588992620 0.9582244334734863 0.5647827142344823  
0.4043427402103611 0.7167275049813452 0.9441507164189359  
0.4779896820587069 0.5002384327072871 0.9394343993452781  
0.8366442779311529 0.5081190496371821 0.0013193958946561  
0.7878272798479352 0.2771816959125835 0.5007288936998240

Co-top-CONTCAR-0-0

1.0000000000000000

|                     |                    |                     |
|---------------------|--------------------|---------------------|
| 5.8948998451000003  | 0.0000000000000000 | 0.0000000000000000  |
| -3.0422965108000000 | 5.1533943039999999 | 0.0000000000000000  |
| 0.0000000000000000  | 0.0000000000000000 | 36.0000000000000000 |

Ni O H Co

18 38 20 2

Direct

|                    |                    |                    |
|--------------------|--------------------|--------------------|
| 0.2951173691898288 | 0.0269061191717379 | 0.9951755329255459 |
| 0.8029821408825599 | 0.0359155381848486 | 0.9992770529611332 |
| 0.6500798916506831 | 0.2050221035019972 | 0.1259054680329242 |
| 0.1493279235596412 | 0.2051279941422892 | 0.1254820250838851 |
| 0.2786807485258090 | 0.2899373952200595 | 0.5068036838904559 |
| 0.2760657220950180 | 0.5223475890836127 | 0.9983804981513590 |
| 0.0485370638622390 | 0.4117857035918085 | 0.2531733779097805 |
| 0.5485711291259290 | 0.4117503366657348 | 0.2533281356115161 |
| 0.4388028595426319 | 0.6136716743742129 | 0.3806949469690326 |
| 0.9439169625530504 | 0.6131951672001306 | 0.3808161140410138 |
| 0.7899122339154805 | 0.7862354300980237 | 0.5097825203540798 |
| 0.1498606037349958 | 0.7055182828535084 | 0.1256657938566215 |
| 0.2880259642681848 | 0.7779610368640171 | 0.5060544615823520 |
| 0.6498006312261957 | 0.7058801631665488 | 0.1256135401963971 |
| 0.0484549591113262 | 0.9117683893670244 | 0.2532540422952723 |
| 0.5488987137950999 | 0.9117102703601286 | 0.2532690795551725 |
| 0.4419158163595584 | 0.1148578385875123 | 0.3809366806189880 |
| 0.9430643456663358 | 0.1164790627836772 | 0.3811088559871558 |
| 0.4976133762115483 | 0.3953646369791631 | 0.0191509274954476 |
| 0.9533482760240544 | 0.3521766659190293 | 0.0282244681209051 |
| 0.8096285190372369 | 0.5341717514150074 | 0.1505479809588108 |
| 0.3102069071531731 | 0.5316867166970559 | 0.1504527432968577 |
| 0.2091745640453887 | 0.7394161222397229 | 0.2776878862580280 |
| 0.7087947235252448 | 0.7381078956984259 | 0.2783779233564346 |
| 0.6049398700647608 | 0.9453656809859681 | 0.4059423263040325 |
| 0.1047740723020023 | 0.9385317645711104 | 0.4059919639595114 |
| 0.9380700548798163 | 0.1274120354355990 | 0.5352467628990151 |
| 0.4605944678264443 | 0.8585140420361190 | 0.0245462261206887 |
| 0.9602209093623526 | 0.8577231673238565 | 0.0261829523866107 |
| 0.8391805926100668 | 0.0519016350779045 | 0.1558211972327365 |
| 0.3400749644940451 | 0.0549738371749366 | 0.1553860382068755 |
| 0.2386769057627672 | 0.2602428895175477 | 0.2831667642855660 |
| 0.7390034376318743 | 0.2606762570072041 | 0.2831660461024904 |
| 0.6186996569845064 | 0.4569399806954169 | 0.4113608725901672 |
| 0.1266283020665543 | 0.4717864159272726 | 0.4082636361243835 |
| 0.9615984446382321 | 0.6026979032916333 | 0.5383850490829647 |
| 0.4558116411770566 | 0.6235148890473008 | 0.5387473445277847 |
| 0.1273030100699599 | 0.1958458582467332 | 0.9661197731922540 |
| 0.6358531233883093 | 0.1860460526023251 | 0.9657433020064486 |
| 0.4628901086975272 | 0.3594548524266030 | 0.0955192848885530 |
| 0.9601831201253586 | 0.3572060086663022 | 0.0970991349899230 |
| 0.8574388093604236 | 0.5631532752040264 | 0.2232937034323406 |
| 0.3582018473829660 | 0.5626110344422537 | 0.2232518023966535 |

0.2667312687387284 0.7755848355622584 0.3499159702975795  
0.7582997462923995 0.7597613571818235 0.3521038362175935  
0.6265748957841738 0.9662375679236700 0.4794854527116516  
0.1229852954325769 0.9508738198258671 0.4807638036889383  
0.0801459000383484 0.6706492909550276 0.9688548949344445  
0.4890057682273054 0.8768234802290515 0.1005911732551888  
0.9888064655244225 0.8782997187078043 0.1003927794962826  
0.8883191135478469 0.0843186936574917 0.2286314968023389  
0.3887985961033775 0.0851618606760571 0.2284103285488570  
0.2786553323286033 0.2849517803422377 0.3560671721400102  
0.7794963665888259 0.2898905307560881 0.3559517729854800  
0.6311398026909570 0.4372351980746860 0.4857626246108764  
0.1385928180390159 0.4650395084465763 0.4763343604657324  
0.4691017989573245 0.8598566443085955 0.0523572036666629  
0.9621716577463366 0.8564561104194794 0.0543636659797418  
0.8653274828912235 0.0683280659773062 0.1836509993397910  
0.3659585524162288 0.0720183201429499 0.1832515327005919  
0.2619635312648237 0.2754495652182731 0.3110403114907013  
0.7635009176081767 0.2782334114278190 0.3110163887271477  
0.6293699335987564 0.4560708759452478 0.4392788427153275  
0.1367659137139878 0.4714354827452088 0.4470409147719951  
0.9781181543340799 0.5589710335223126 0.5638178072046337  
0.4615528603282926 0.6354073141397987 0.5656004734723605  
0.1116464214169235 0.1988941857150977 0.9393994464424877  
0.6786228838380479 0.2291949256651165 0.9397609232593832  
0.4545041705749208 0.3574407981822124 0.0679585465938613  
0.9456355875997842 0.3516772394085791 0.0684340614025418  
0.8309511889124312 0.5470826845111358 0.1954356900549743  
0.3320721719264766 0.5454412027731045 0.1954090862628489  
0.2439266566999222 0.7612745642244644 0.3220236942003969  
0.7362664207106158 0.7430165275433469 0.3241129484900751  
0.6194182894213933 0.9690798292881950 0.4512783191966205  
0.1193539224275720 0.9465733301563790 0.4527740420514118  
0.8141232291137370 0.5187388345118448 0.9999192499147459  
0.8090020982761100 0.2877898669894887 0.5055524736685453

Co-sub-CONTCAR-OOH

1.0000000000000000

5.8948998451000003 0.0000000000000000 0.0000000000000000  
-3.0422965108000000 5.1533943039999999 0.0000000000000000  
0.0000000000000000 0.0000000000000000 36.0000000000000000

Ni O H Co

18 42 22 2

Direct

0.2771049612105912 0.0169662023774316 0.9971690837787451  
0.7813606246863244 0.0334017419730962 0.9971685089770601  
0.1512248575695384 0.2131596311250291 0.1253152190692171  
0.3028825737030552 0.3124622845463608 0.5090173848406375  
0.2726470048941909 0.5177561102110034 0.9977245237373896  
0.0418485472949072 0.4122425620188785 0.2532411051355168  
0.5417879675609165 0.4122117205270567 0.2532457180964558  
0.4342633288275694 0.6133415176289924 0.3811364696256093  
0.9343975740684671 0.6137908795011098 0.3811341095597169  
0.8085250932070278 0.8102835993961892 0.5089452519156868  
0.1511379753338640 0.7129792889213566 0.1255151462151126  
0.3064282556213330 0.8023990125514588 0.5080822576427254  
0.7870036474608276 0.5267949639362516 0.9992270504994099  
0.6512293718977964 0.7131525679523814 0.1253650021748074  
0.0417800311837699 0.9121104618350729 0.2532368296743059  
0.5417225471214261 0.9121501540646250 0.2532129835899544  
0.4341810625834253 0.1139592824391268 0.3812573764373163  
0.8149081939288030 0.3108306733346430 0.5065079480860294  
0.4433375534779346 0.3411632954244240 0.0221788215627160  
0.9446330041575699 0.3661315079340718 0.0243780632225012  
0.8114214258853722 0.5403375853981116 0.1502662064715996  
0.3122953509323145 0.5400377615384970 0.1500836959542284  
0.2015381558748975 0.7390893488179253 0.2779055532412049  
0.7012929849956661 0.7387121782754331 0.2779555333403904  
0.5942012742799492 0.9405873648745821 0.4057541690140200  
0.0935326581610998 0.9408664083151396 0.4059781002937191  
0.9438511210505710 0.1300085243607574 0.5350078779377572  
0.4873193674631878 0.1279360887745584 0.5363183820359465  
0.4512140635111740 0.8597194781465626 0.0264861134679565  
0.9540107102120764 0.8712685423382865 0.0269101342069786  
0.8414505237647317 0.0624303061086538 0.1556938083429248  
0.3409326012709807 0.0623581755416618 0.1556649978047872  
0.2324188740281653 0.2608953340467343 0.2832533209649115  
0.7320001864249833 0.2608616919139576 0.2832169502665092  
0.6255829048380640 0.4627553204948182 0.4112506493531092  
0.1256677019983772 0.4672343983353330 0.4107934893825242  
0.9927607247675765 0.6537931200499473 0.5392942079291714  
0.4871776864441124 0.6456024359248120 0.5387009068348299  
0.1078052724866141 0.1822624567851990 0.9665049536241320  
0.5878420052377831 0.1679372720439818 0.9627154918772945  
0.4613793354629265 0.3629950880243622 0.0950346874565721  
0.9620201523573588 0.3656874316628336 0.0955820371080224  
0.8514675685025547 0.5636949394891076 0.2232915328909751

0.3515332078737819 0.5635039304181670 0.2232352178662158  
0.2444021123283238 0.7663702322542918 0.3510385360095310  
0.7421437000828995 0.7608189953419097 0.3509491036656949  
0.6227441415998616 0.9605687535348714 0.4783343162517374  
0.1318550685559501 0.9721547506490490 0.4805296170334358  
0.1119018390791990 0.6948759594355081 0.9727414645936316  
0.6110338603343175 0.6761265073784211 0.9702039938472673  
0.4899525759488921 0.8860167224807773 0.1006779802577976  
0.9906375011252230 0.8860836617069748 0.1007040475707567  
0.8822583499673794 0.0854990811716493 0.2285190244669447  
0.3820542674994771 0.0858504304633212 0.2285166589851044  
0.2742078725003068 0.2863906576343278 0.3565911973738862  
0.7746014802950927 0.2869724633012866 0.3565249850740997  
0.6618219872615870 0.4876622689070199 0.4835939950197546  
0.1400293714498858 0.4874476638100699 0.4811996764842799  
0.5634408822893466 0.1106242366458094 0.5738572422905481  
0.6066028103882264 0.6241223059289950 0.9308179011518908  
0.4643169059835309 0.8716344434552666 0.0542431067599715  
0.9716213362765608 0.8795810228903389 0.0547490604620246  
0.8657318946929431 0.0768345176710515 0.1836396751845762  
0.3639750597906753 0.0788712755808727 0.1835875875427403  
0.2578998361956734 0.2765672550002456 0.3110439579724277  
0.7563098275754635 0.2768498217820440 0.3110308128072712  
0.6514997260945828 0.4806982103805229 0.4393258262069358  
0.1408436090890460 0.4850910860999177 0.4392766661352725  
0.0227680132395392 0.6731232099154452 0.5659325378321256  
0.5030593773266767 0.6666600809576908 0.5654705218992579  
0.0972886891368100 0.1727355554478459 0.9396425514422064  
0.5424099108616534 0.0603503223023975 0.9405409755609287  
0.4429700759793170 0.3458874732398937 0.0669338667435732  
0.9474334037843135 0.3614333679070216 0.0672092931380086  
0.8275588836808073 0.5498552139364756 0.1954491549699633  
0.3277255395309999 0.5485714452983909 0.1953858209031706  
0.2197136692123612 0.7511563593710376 0.3232169343862138  
0.7170175562775152 0.7447800281785734 0.3230818765971636  
0.6046131825708124 0.9456242064575866 0.4502761930536172  
0.1138622898150019 0.9571471761097095 0.4526982553615752  
0.7346364753618123 0.1129934551120310 0.5669176624163991  
0.6071730710976199 0.4582851892861546 0.9325431019342864  
0.6511243131567832 0.2133503683857211 0.1254409808820465  
0.9343895249499042 0.1140014852114860 0.3812171572251962

Co-sub-CONTCAR-O2

1.0000000000000000

5.8948998451000003 0.0000000000000000 0.0000000000000000  
-3.0422965108000000 5.1533943039999999 0.0000000000000000  
0.0000000000000000 0.0000000000000000 36.0000000000000000

Ni O H Co

18 42 20 2

Direct

0.2735426556608791 0.0084076715148273 0.9978475590191570  
0.7806662388768890 0.0216283205681747 0.9985418859060829  
0.1490602899406368 0.2046496774337426 0.1249980661348084  
0.3114864118295314 0.3023708862791662 0.5074828687337190  
0.2649627043713570 0.5083270664804581 0.9986423516540214  
0.0462505017081267 0.4145377476250576 0.2531084378651070  
0.5462204953904517 0.4145232592564397 0.2531331030104049  
0.4458498658108221 0.6168692009890607 0.3811958372054338  
0.9466989865671150 0.6167235585117689 0.3812069348733523  
0.8167841170839667 0.8029695296449613 0.5082184194025049  
0.1488983720086547 0.7035760404957858 0.1251052844845257  
0.3090447855521286 0.7887449027598487 0.5073420257332655  
0.7794518269020743 0.5083483565203585 0.9985456040816983  
0.6491744297770314 0.7039403119635219 0.1250567790789299  
0.0462699999196540 0.9144092367534509 0.2531546736718614  
0.5462298969542914 0.9144602148665135 0.2531450349183453  
0.4463523694319096 0.1175063847043546 0.3811854707302332  
0.8274959013732248 0.3027767821822936 0.5069407361025782  
0.4308777260643608 0.3337556449199877 0.0227313543750560  
0.9359240494279568 0.3426769138784079 0.0263604886555123  
0.8103382823019566 0.5324403846501264 0.1500211537767546  
0.3104832043984503 0.5313769689475455 0.1498770275633423  
0.2061671681477366 0.7413928536187837 0.2778372732051103  
0.7061621851445359 0.7411898116422104 0.2779502366951101  
0.6077172846186758 0.9468511085359645 0.4059346429594227  
0.1053933748960661 0.9433048141641620 0.4060433292335510  
0.9689208083487559 0.1274164683673826 0.5330725949109216  
0.4690062806054319 0.1281488660728282 0.5386260560985157  
0.4497600243650576 0.8428033685066441 0.0269549903792289  
0.9513756525507819 0.8546858273262090 0.0264831002381163  
0.8385436255346255 0.0532380868420025 0.1554613142245641  
0.3397589829692120 0.0544030135052388 0.1552593699613978  
0.2370869420533528 0.2632221970244123 0.2831701301780757  
0.7368527198491103 0.2632618173587616 0.2831442105661909  
0.6364804842451964 0.4649760750726532 0.4111468421056581  
0.1379863654553848 0.4686369759845377 0.4106372775122355  
0.9818654866310441 0.6164514859901629 0.5386152188768891  
0.5006114180951136 0.6496217797846634 0.5378754272135405  
0.1050766800320396 0.1799249232306662 0.9672467802111604  
0.5948384346532231 0.1664207561593242 0.9679931393535339  
0.4599527043371044 0.3540118145140909 0.0947797474905970  
0.9586827880441655 0.3543489275549197 0.0954391750961482  
0.85553483232359101 0.5656409564542623 0.2231455720686173

0.3556933930349782 0.5654631046371859 0.2230991327562762  
0.2565399650825203 0.7701105532887553 0.3510254212318569  
0.7546026620907255 0.7655434292252499 0.3511141922194317  
0.6428084387658735 0.9792884052092395 0.4791778861339159  
0.1343947549757260 0.9527584038152401 0.4798173896340953  
0.1168163831830710 0.6873722111142582 0.9728850950595782  
0.6130545588228306 0.6802919131433240 0.9680372389624031  
0.4876844691044532 0.8756890583714050 0.1002750441724507  
0.9884297850830870 0.8771165240636307 0.1002559249888239  
0.8864569910599567 0.0875200336884396 0.2284278658692635  
0.3863611475696516 0.0878498073687573 0.2284069161343428  
0.2858697725447889 0.2892021672002233 0.3565151054747876  
0.7869336499750669 0.2910006452049123 0.3564017297296006  
0.6638809429040092 0.4732067748942215 0.4836178256733291  
0.1595450744087962 0.4691718246151600 0.4790708237933831  
0.4603071143138967 0.1302332572736197 0.5749151767974479  
0.6135283334110391 0.6773566276297714 0.9316352492529089  
0.4614034402096634 0.8499284009457695 0.0549264263319639  
0.9696923136386282 0.8665585222462681 0.0544210069880372  
0.8642081459734382 0.0711105605467622 0.1833350419706772  
0.3644169494831684 0.0739834161950021 0.1830918897790100  
0.2643806437499133 0.2789979556139316 0.3108980415309796  
0.7634157294721921 0.2798422960380040 0.3108961568931010  
0.6579050840794350 0.4755531806081521 0.4392406798730404  
0.1560112994107496 0.4734413014765509 0.4402606052455647  
0.9904548062428482 0.5941358098327949 0.5652136886271275  
0.5295790514363906 0.6822150412720902 0.5643869097032267  
0.0914755551293751 0.1788963084323402 0.9403639229564632  
0.5722990944996484 0.1454624785815442 0.9412464302560261  
0.4393366735581384 0.3385098034731798 0.0664909066025388  
0.9417617692070980 0.3438012944090223 0.0662373347755656  
0.8303401308158143 0.5487671335642375 0.1953312090871546  
0.3304484277399946 0.5472124981129718 0.1952827046071311  
0.2301506160825584 0.7546779252709269 0.3232176669626441  
0.7279106703837317 0.7502222985992417 0.3232299050425815  
0.6337037477975908 0.9784461929952439 0.4510649100920656  
0.1163917365379624 0.9410016089208144 0.4518314939471862  
0.6498705551165191 0.2050443918853716 0.1250836649622082  
0.9468987799406888 0.1182057645807005 0.3812540433265153



Co-sub-CONTCAR-0-OH

1.0000000000000000

5.8948998451000003 0.0000000000000000 0.0000000000000000  
-3.0422965108000000 5.1533943039999999 0.0000000000000000  
0.0000000000000000 0.0000000000000000 36.0000000000000000

Ni O H Co  
18 40 22 2

Direct

0.2829207259872462 0.9951687010496570 0.9989167840856936  
0.7877610935679868 0.0064778533030179 0.9989224776257331  
0.1511714617385067 0.2053938670695601 0.1252883490055083  
0.3072295051311471 0.3109179315076318 0.5081356581321472  
0.2797582752456833 0.4986495826566824 0.9992455582745450  
0.0366783117448222 0.4174720730440953 0.2526914098332682  
0.5366512904534488 0.4173354435429744 0.2526979532026346  
0.4338787228455274 0.6161277654529087 0.3806491827328387  
0.9338408569473131 0.6163575710211902 0.3809187483080052  
0.8121891019050693 0.8156814991968275 0.5084156950296617  
0.1506995308040189 0.7044555564478969 0.1257161732948120  
0.3078080659935907 0.8051653713749900 0.5084345091160145  
0.7889504482293717 0.5010480363862868 0.9991627354492323  
0.6510232744778577 0.7046366246303606 0.1255721553153322  
0.0365441831338273 0.9172737007589831 0.2524935119980611  
0.5364122223257368 0.9167584739566550 0.2528107710083205  
0.4337763485104844 0.1167548066796869 0.3807472294831769  
0.8155533074494059 0.3126627707114338 0.5083082841770050  
0.4556852146123447 0.3191103293409228 0.0241360546816196  
0.9377126741574315 0.3391247824014485 0.0260647363600697  
0.8094149976508405 0.5253866346529819 0.1510520223480469  
0.3223016261892440 0.5496772201282454 0.1506212872083736  
0.1967593414049347 0.7445126460863776 0.2774405580289780  
0.6965982709189902 0.7437487157596436 0.2775050945080650  
0.5946065495881570 0.9439321949368988 0.4050661415676657  
0.0924719043601954 0.9432395678320518 0.4053515506022052  
0.9797549944159130 0.1354660660931799 0.5339729620122071  
0.4581880424322904 0.8318338610740170 0.0279625108395507  
0.9674140625269132 0.8503748359142591 0.0279993327752237  
0.8138448153313504 0.0612648089108561 0.1551127582986851  
0.3452449578991619 0.0609198740947150 0.1552698467767755  
0.2270510406723787 0.2651038129152710 0.2825866855790835  
0.7273993931372686 0.2657739602546272 0.2827774471974962  
0.6238783122266369 0.4654002949748488 0.4108137293522205  
0.1259522002341598 0.4677296767288013 0.4106629216130528  
0.9793492756255660 0.6431133945064431 0.5399796624840789  
0.4989711713648504 0.6641513869206435 0.5397758859712951  
0.1162996535592384 0.1718404005802654 0.9677052550283776  
0.5952962245690614 0.1460722878969065 0.9674523433417122  
0.4904273121994223 0.3479014550691844 0.0959312794179894  
0.9559685171937247 0.3504887128786791 0.0960338662162670  
0.8462219691395632 0.5683521290478382 0.2229943683166553  
0.3463594221017203 0.5688518389266903 0.2227708857372548

0.2428934578453692 0.7680899909685834 0.3506788921602464  
0.7424183462581198 0.7640300696069033 0.3504607383639211  
0.6371428805976862 0.9785336332962373 0.4789738087880835  
0.1276625152934372 0.9603414240043335 0.4792506002534012  
0.1132342268080748 0.6761517124947005 0.9732887967985917  
0.4916392554901705 0.8840036316214892 0.1004720629580120  
0.9801790053160175 0.8595046652431435 0.1006264761871876  
0.8742778445123989 0.0901280030739571 0.2277606610137113  
0.3780980456991045 0.0904438486174470 0.2278129294399136  
0.2737550980246439 0.2893364755855217 0.3560776486017545  
0.7744923211066705 0.2902906668704759 0.3561604096614417  
0.6447898458491323 0.4918782887783593 0.4834476046666012  
0.1542269228942672 0.4716403970393088 0.4816615354150144  
0.4683323609355767 0.1486952223204696 0.5363261678657594  
0.6291971121209841 0.6625228393736649 0.9707798375272247  
0.4681707558089627 0.8491629255115072 0.0557948843067066  
0.9818787294295177 0.8563720473348155 0.0561617496793403  
0.8275538329349530 0.0824061057854166 0.1831726237989244  
0.3707562399910174 0.0788106657426937 0.1833301457440584  
0.2534310793197321 0.2797057659396174 0.3103458937017649  
0.7532412143255840 0.2814475928186511 0.3105462231135121  
0.6418883755349114 0.4832643482828516 0.4389612357130659  
0.1473696878135868 0.4721765355582335 0.4391768237708078  
0.9927143598433403 0.6455834176750557 0.5667967157734068  
0.5420751201349177 0.7054785601495439 0.5658019789707680  
0.1052403980536880 0.1768010806743163 0.9409055139030329  
0.5499334608938113 0.1018021176739978 0.9415303810314199  
0.4845027046963111 0.3265987955167873 0.0674564816553840  
0.9341898057427969 0.3428412774595415 0.0669662781298257  
0.8224909049709197 0.5461704603156861 0.1951144435100360  
0.3285954671275775 0.5584919039414871 0.1945180608532766  
0.2168601608338250 0.7537666073357556 0.3228777830290497  
0.7165947804821897 0.7496167270958409 0.3225654927298507  
0.6227889916476244 0.9664257663545541 0.4512228613233802  
0.1062715280763271 0.9487036856831566 0.4514843439368974  
0.4571664239191193 0.1641346548292546 0.5629874029921567  
0.6471639776849614 0.6480842158217115 0.9442427799892172  
0.6517446817715182 0.2055839998418492 0.1255376819214291  
0.9340393952087780 0.1169212580464318 0.3806779033868466

Co-sub-CONTCAR-0-O

1.0000000000000000

5.8948998451000003 0.0000000000000000 0.0000000000000000  
-3.0422965108000000 5.1533943039999999 0.0000000000000000  
0.0000000000000000 0.0000000000000000 36.0000000000000000

Ni O H Co

18 40 20 2

Direct

0.2615337393739310 0.0004464762770908 0.9979463648879801  
0.7615926857637163 0.0004174897090650 0.9979285146992112  
0.1549083180107687 0.2092656244028959 0.1251360880913879  
0.3286941486688306 0.3063894757780119 0.5090251489368640  
0.2635944476793455 0.5063076592456426 0.9972378956007759  
0.0435260875049011 0.4113307705932101 0.2531509264514398  
0.5434910521581529 0.4113421561225294 0.2531204529198661  
0.4354735044816707 0.6085157919441215 0.3811226191639037  
0.9355991776967727 0.6085497578114669 0.3811243302470544  
0.8306390057176216 0.8121536069070956 0.5083603275415456  
0.1547531297492313 0.7089749119200519 0.1251976708292091  
0.3308347428912697 0.8122562734706094 0.5084354924647627  
0.7635975699269935 0.5063240910445543 0.9972787470686910  
0.6547427074153589 0.7089741041367716 0.1251950666514148  
0.0435220955327722 0.9112232708088612 0.2531909962689340  
0.5434278161314765 0.9112492338251741 0.2531491399466219  
0.4357056612811832 0.1088122058517129 0.3810613933502793  
0.8286608468007444 0.3064904163574198 0.5090033519327264  
0.4225632676356454 0.3302338352902439 0.0216125392939333  
0.9227896331552543 0.3300443971042526 0.0215978175829648  
0.8151302261365387 0.5360046569512917 0.1499005789930834  
0.3148140451284505 0.5360589952456820 0.1498421814793289  
0.2032211206740016 0.7379548206847488 0.2778482702768130  
0.7030863888670709 0.7376981956320847 0.2778399200503827  
0.5955716783889855 0.9353798336283248 0.4055435916580734  
0.0946950347285451 0.9350515229346570 0.4055545772958880  
0.9886570917854129 0.1325782047768840 0.5332396116344000  
0.4506492983936496 0.8525715158450922 0.0278613941456669  
0.9506763737646580 0.8527718797521473 0.0279316576397122  
0.8469846525471070 0.0584927890198443 0.1554961689372760  
0.3452557109039560 0.0577683394883906 0.1554771901831273  
0.2342954756819040 0.2601023056959519 0.2831787875170448  
0.7338638418789785 0.2599475079001721 0.2831568187359110  
0.6262020737005045 0.4570805789810848 0.4112448601034018  
0.1286873871347609 0.4618712672527110 0.4114823684727682  
0.0193792545507208 0.6611861517676942 0.5393433307271280  
0.5198464730728674 0.6621743043372632 0.5393658794010179  
0.0728586408055207 0.1508549927355247 0.9669713945536884  
0.5729141188226166 0.1509146863719266 0.9669873122347425  
0.4626530739875321 0.3597365693243830 0.0947350085937089  
0.9644472061029177 0.3604929042971960 0.0947508975235607  
0.8532711400426578 0.5627373881685784 0.2231656549797520  
0.3532210022452205 0.5625922183306926 0.2231122534961045

0.2448669461482567 0.7601847063477081 0.3510110968958173  
0.7424241429777396 0.7552292680717159 0.3508030272800156  
0.6413121395105250 0.9601218933723459 0.4783965604189362  
0.1415590262332884 0.9596709345671997 0.4784351462646299  
0.1035881790698312 0.6801207017308570 0.9730329941706017  
0.4943619203111567 0.8819812249133108 0.1004870848289059  
0.9947179810364659 0.8819826236301154 0.1005583433260426  
0.8841109050819824 0.0846189978930738 0.2285039829107660  
0.3837033132475227 0.0848752128008883 0.2284927948486342  
0.2756879472167242 0.2820784924772113 0.3565701771092193  
0.7767115643314284 0.2822695848771346 0.3565667488989561  
0.6694230066780662 0.4826562168254185 0.4846553764143025  
0.1698646139093185 0.4830424888313587 0.4846896045340330  
0.4886489496904645 0.1325883503244398 0.5332838856328195  
0.6037361626905877 0.6801422041734568 0.9730273870326513  
0.4748417389645851 0.8684961265085249 0.0557357133716252  
0.9751544482573280 0.8693789377204340 0.0558188031164022  
0.8714481903315701 0.0742217258065949 0.1833743380015704  
0.3677161861027116 0.0754269967008057 0.1833509441764534  
0.2598102441589205 0.2747823815111374 0.3109595466748019  
0.7583636755380923 0.2747919747836036 0.3109475756387781  
0.6508314379261932 0.4719033551387852 0.4390904184133007  
0.1538873381300476 0.4770911129285551 0.4393519862151152  
0.0565381775165719 0.7005234021624744 0.5655719568483022  
0.5588172869627783 0.7051975714568144 0.5654830941476092  
0.0352737690158165 0.1098461327005182 0.9407877095733497  
0.5354339238464974 0.1101555513646417 0.9407971858609230  
0.4377721758793669 0.3435147141307979 0.0668409374824179  
0.9414954254089594 0.3422872267657908 0.0668641235857592  
0.8298599306898922 0.5475531251385988 0.1953365502310618  
0.3295573093454607 0.5467537825998434 0.1952679786577676  
0.2202089944930989 0.7456797034949076 0.3231781631024973  
0.7174494542469674 0.7406426674802873 0.3229407691491630  
0.6152996430755664 0.9443219725729222 0.4505843683642325  
0.1166256756776605 0.9437643832635132 0.4506066034683371  
0.6548852315293416 0.2092417939197730 0.1251223909472543  
0.9356919698490245 0.1087492092913607 0.3810602708447917

Co-sub-CONTCAR-0-H2O

1.0000000000000000

5.8948998451000003 0.0000000000000000 0.0000000000000000  
-3.0422965108000000 5.1533943039999999 0.0000000000000000  
0.0000000000000000 0.0000000000000000 36.0000000000000000

Ni O H Co

18 40 24 2

Direct

0.2925205217190415 0.0184215557725793 0.9967732086761167  
0.8086174485057819 0.0349702362983563 0.9985416097282960  
0.1576357753899980 0.2114540545408517 0.1252821933951911  
0.3051921524627043 0.3063724531213945 0.5054569647720019  
0.2863833794605100 0.5276178659144468 0.0020113611307610  
0.0545525086015599 0.4234993964146510 0.2530625697155663  
0.5548175820919433 0.4239346300360326 0.2532384936458639  
0.4472990337797826 0.6204022528926042 0.3805797466448572  
0.9515809529669440 0.6219006883718236 0.3809787809626191  
0.8107506307971487 0.7986803646053997 0.5092728621304042  
0.1578725283687053 0.7107979423180179 0.1252739669451943  
0.3011973476907320 0.7899925419953530 0.5073451956090150  
0.8007846231256280 0.5131437788529559 0.9996298192642069  
0.6580080255538191 0.7114188272391418 0.1251613962039732  
0.0546777624432595 0.9234990936064686 0.2531750983787074  
0.5545857712223047 0.9235500406222035 0.2531765088235298  
0.4502635216682635 0.1233233305717118 0.3811233322845449  
0.8152242938850435 0.2980674248822438 0.5081137248741600  
0.4444382862512538 0.3424616333629553 0.0216411867581487  
0.9687812395922074 0.3537136215556618 0.0280194803550476  
0.8188346224171988 0.5401603885313938 0.1502506208511729  
0.3198086189954602 0.5387063535699574 0.1500448565064188  
0.2139694074452033 0.7502626646105865 0.2778711043558290  
0.7155211657019740 0.7514341372882328 0.2783475501151503  
0.6081879029276036 0.9515135380123236 0.4060620734582917  
0.1102547917087052 0.9536713101474988 0.4058349197248880  
0.9791221376696321 0.1100713859722336 0.5368848747477394  
0.4721353804590568 0.8736565347105981 0.0265835616777484  
0.9569315959571101 0.8520024973116865 0.0258895195387138  
0.8471981598543346 0.0601246901851080 0.1557515604570827  
0.3484970669249321 0.0615799686774709 0.1553827919706516  
0.2449812294997049 0.2720718968552031 0.2830283358634796  
0.7444612930225903 0.2715141771840129 0.2830280006410421  
0.6434804097301384 0.4735457435620647 0.4107374261507921  
0.1329167537830020 0.4540222531118152 0.4081027252674634  
0.9699608506310363 0.6256464221137399 0.5394473898105637  
0.4746007111697657 0.6357814575236488 0.5389853516376849  
0.1199268362288861 0.1468711669366143 0.9619427131499254  
0.6362082316990356 0.1889898671915383 0.9668448868293323  
0.4681510877332919 0.3608791121538888 0.0948860975727574  
0.9687583276637707 0.3613671719011228 0.0961133525438667  
0.8639109637478699 0.5748927472215666 0.2232303377878139  
0.3648089309273669 0.5750149307577447 0.2231742223225406

0.2587963840377204 0.7764616149764814 0.3507198344495165  
0.7660838948815838 0.7864648898551395 0.3516497614728947  
0.6407727121772712 0.9626629650394125 0.4810915287347660  
0.1433166243013221 0.9640451840723231 0.4800971876956538  
0.1447673793537483 0.7024219003939244 0.9712853162947194  
0.4969787450193491 0.8839264386799813 0.1002735165841253  
0.9968795048463832 0.8840573583766922 0.1004822164815043  
0.8949325672259393 0.0962901397826883 0.2284339313473066  
0.3943928217237338 0.0970970710185536 0.2283608427811821  
0.2911903265765075 0.2929767022666745 0.3557743943535059  
0.7886445693799369 0.2915923487589252 0.3560226113473454  
0.6511809819909774 0.4811636550470141 0.4827806782652522  
0.1408185760688308 0.4686807309051098 0.4782498141499596  
0.4128485607971688 0.1320366680307151 0.5607183310927328  
0.5301632303533600 0.6483135394984447 0.9487507154035875  
0.4800266076535643 0.8815653448687935 0.0546051886585926  
0.9683276163363526 0.8638049367114669 0.0537202625407333  
0.8726579871310723 0.0781669628474711 0.1836302920437021  
0.3727211580296703 0.0818117319878094 0.1832298792293255  
0.2710248847881573 0.2863824898912856 0.3107964185144541  
0.7694865675811349 0.2848782532198523 0.3107965011770132  
0.6587963364491656 0.4866368036213795 0.4393360123147821  
0.1408515083903459 0.4634689075915636 0.4499138183409386  
0.9497126432514494 0.6076734693255639 0.5661629628194440  
0.4774815918959595 0.5978157112958372 0.5650953017657228  
0.0477297622141495 0.0202894779434816 0.9418332535930847  
0.6569329426977462 0.1998788933755132 0.9400808490349489  
0.4471358742798738 0.3431862822084066 0.0668056118059104  
0.9631364304604120 0.3520783090789290 0.0664424724715749  
0.8385051107920896 0.5577301844806842 0.1953832174954412  
0.3399591578461009 0.5562721227940388 0.1953336925611731  
0.2324967036582764 0.7616703214273954 0.3228292306485565  
0.7433666105149821 0.7775675165496518 0.3235390854400311  
0.6306474819713513 0.9581394209549799 0.4532861918119862  
0.1308398169311998 0.9568777195082705 0.4522047909795082  
0.2218096115756997 0.0918551782880470 0.5589716911124859  
0.4113316069719699 0.9799722498661327 0.5707594839549114  
0.3947733553345701 0.7048108291220369 0.9471755898937574  
0.4204754437251034 0.4581782105646255 0.9443789829961029  
0.6589578197086283 0.2123596152776208 0.1253287036283554  
0.9506186216028861 0.1258855829921903 0.3811282794343197

Co-sub-CONTCAR-0-0

1.0000000000000000

5.8948998451000003 0.0000000000000000 0.0000000000000000  
-3.0422965108000000 5.1533943039999999 0.0000000000000000  
0.0000000000000000 0.0000000000000000 36.0000000000000000

Ni O H Co

18 38 20 2

Direct

0.2838370821751078 0.0171472732021129 0.9970968902652106  
0.7926495818550360 0.0346075258289365 0.0003488215204750  
0.1486534987623250 0.2040712646047758 0.1250704651689855  
0.2998775545251293 0.2991982034778577 0.5059445573430538  
0.2658120607887802 0.5145588673404002 0.9999544443870279  
0.0440249698745247 0.4122817853112596 0.2531227462276739  
0.5440217808884346 0.4122422670001210 0.2531355335091321  
0.4422837652602124 0.6137205233369056 0.3809282148413447  
0.9437750589272975 0.6138684630002906 0.3811548079248503  
0.8104482255330441 0.7976782949895378 0.5089057514950655  
0.1488547799422803 0.7030457424099082 0.1251026985364899  
0.3015187906273217 0.7798129105667541 0.5054776939726913  
0.7942838526233633 0.5155129952392500 0.0000079766493016  
0.6492985118794015 0.7037121828786028 0.1250182664128935  
0.0440167724473693 0.9122348790128781 0.2531437859711444  
0.5439587047696683 0.9122479145711081 0.2531289336426374  
0.4429836204915059 0.1144836300166683 0.3811601366536820  
0.8281966360738259 0.3000215036708966 0.5059535838696608  
0.4406578517288712 0.3487541470807621 0.0212011679556915  
0.9472443563159060 0.3520362777031692 0.0286572878874301  
0.8104442881482181 0.5331045375015628 0.1500864245498180  
0.3106236928772491 0.5303567326689529 0.1499229613200080  
0.2039784160087648 0.7393188337613223 0.2777929255708418  
0.7037707297459991 0.7388739373644235 0.2779892343700328  
0.6041290266916278 0.9437957003936486 0.4058363330115085  
0.1025315903198770 0.9406829457276055 0.4061505796516406  
0.9634517705062038 0.1169167156644661 0.5342996722593331  
0.4560590325885197 0.8494236246236652 0.0266737438614138  
0.9595345341012751 0.8616590455093103 0.0259078684617768  
0.8375118825525155 0.0510203652598355 0.1556252110197730  
0.3392509052871863 0.0539662050102375 0.1551402252415149  
0.2350040286769922 0.2607580896457574 0.2831340609074910  
0.7346227115185351 0.2610926862051232 0.2831416292094931  
0.6330943867952962 0.4623203773015873 0.4111439562695068  
0.1343177796872975 0.4647441421989476 0.4099925432987490  
0.9824644952854875 0.6267077699531217 0.5392500679216589  
0.4852417246197808 0.6396809854928416 0.5382936412450479  
0.1118467092213962 0.1874501108861887 0.9665960243905423  
0.6087136129662565 0.1754055685060822 0.9676833139340043  
0.4604700239856455 0.3548465065674232 0.0947439164281970  
0.9591340847343026 0.3537463530027888 0.0961627111638487  
0.8535143295899716 0.5637299438023896 0.2231940970903168  
0.3536509703309347 0.5633323104040303 0.2231182347010267

0.2536158469676741 0.7679162249032284 0.3508479044109271  
0.7520075694741317 0.7631830764145664 0.3511287104194132  
0.6382668600617285 0.9652200853188860 0.4792732076128064  
0.1345425360091963 0.9528854888805237 0.4801045929259450  
0.1315330633607822 0.6976134242346453 0.9716943453954012  
0.4874356571077048 0.8744361946530584 0.1001156126949155  
0.9886608228225844 0.8773401323546289 0.1000224886323062  
0.8841286417292862 0.0853082505253431 0.2284609229172819  
0.3842303698834634 0.0857725710130016 0.2283199877399200  
0.2826175745339988 0.2851157573303673 0.3563373889425480  
0.7829171402787712 0.2878727523418752 0.3563171084926278  
0.6531552279368700 0.4664720092919263 0.4848198518803482  
0.1474799590281599 0.4624719363990137 0.4769632802099056  
0.4656974405067994 0.8515614363463011 0.0547533594631527  
0.9733848210725966 0.8697382595819008 0.0540088371583581  
0.8622380085005894 0.0678091053619974 0.1835201910906669  
0.3629222846854931 0.0724870837888099 0.1830236277107309  
0.2620067133994265 0.2757307185595834 0.3108913980474772  
0.7605805756816572 0.2773891777335536 0.3109209838696873  
0.6527393784147135 0.4730341703067714 0.4391093964861989  
0.1468264119409471 0.4665510281146893 0.4407750709284433  
0.9999281488617933 0.6170584560551174 0.5658808389193899  
0.5079980067601461 0.6632839240326803 0.5649557691907406  
0.0956117366067676 0.1968239931195068 0.9399324116732786  
0.5860263548144669 0.1527747798615732 0.9410099343419130  
0.4415076520444249 0.3432843118556259 0.0667182506897223  
0.9481735141245837 0.3483458020602925 0.0661639662401623  
0.8287232418321905 0.5476026468025662 0.1953821027036119  
0.3288906023901506 0.5450815578038851 0.1953106022479840  
0.2273819690758223 0.7529614818908655 0.3230443995698115  
0.7260562614092579 0.7486479449527802 0.3232339841729137  
0.6270225928634167 0.9631020196234771 0.4512273126289985  
0.1200122564262722 0.9457564187933530 0.4520080294339828  
0.6501582415040948 0.2045434361613620 0.1252542298094658  
0.9435943331613197 0.1155041238387362 0.3812169692369660



Mn-top-CONTCAR-OOH

1.0000000000000000

5.8948998451000003 0.0000000000000000 0.0000000000000000  
-3.0422965108000000 5.1533943039999999 0.0000000000000000  
0.0000000000000000 0.0000000000000000 36.0000000000000000

Ni O H Mn

18 42 22 2

Direct

0.2788979346653946 0.0209534128889288 0.9972598822279579  
0.7865379949201952 0.0265858970937245 0.9980480509997989  
0.6374074831728365 0.1989391388881288 0.1254420726935308  
0.1375117495573264 0.1991702894995200 0.1251575518920305  
0.2928901001708653 0.2958235880680817 0.5096989570807722  
0.2746420587367311 0.5226564235804005 0.9962365981767718  
0.0364146128461300 0.4072266679000691 0.2530390535606628  
0.5364350467702721 0.4072352845868394 0.2530466512240679  
0.4341460785631241 0.6193673154532249 0.3807462858923216  
0.9345606847630776 0.6198527695274549 0.3806787965518765  
0.7975354294159160 0.7967770883027470 0.5087702982771276  
0.1375707249690876 0.6984596460001811 0.1252919794286314  
0.2995688232306009 0.7922407471975532 0.5081095315489392  
0.6371989025103062 0.6989607236476658 0.1251461818310489  
0.0364575745217124 0.9072148954582460 0.2530405990180356  
0.5364534678060409 0.9072254541788567 0.2530280334860890  
0.4340855684670828 0.1198991861951981 0.3808904049932238  
0.9347066669403929 0.1199664792103334 0.3806940887533230  
0.4508738107099646 0.3448705672970505 0.0233937036706777  
0.9383029495247897 0.3621989503392058 0.0260859910727333  
0.7972341311081621 0.5271382147236210 0.1502059249145731  
0.2981476285983575 0.5263210436527999 0.1501075850265110  
0.1965059745264881 0.7344342121823999 0.2777112677518687  
0.6964551832497179 0.7343991772045797 0.2777644833144564  
0.5957881476957994 0.9492571341361824 0.4059229757191787  
0.0939343207796455 0.9466663193312002 0.4059364372058454  
0.9338215146168523 0.1154289395159580 0.5358617448035972  
0.4865366922344947 0.1302393314364849 0.5380357908650240  
0.4427911205132986 0.8637522571167580 0.0247731904325832  
0.9315584983115386 0.8351859280889968 0.0285630614888177  
0.8284519685039697 0.0468173285848650 0.1552514082637941  
0.3280251863075705 0.0469460408820623 0.1552052806861255  
0.2271309831160551 0.2563302366319320 0.2830292329656245  
0.7270234224227536 0.2564551058355917 0.2830232480392354  
0.6246600417984141 0.4681956279489512 0.4104692541344335  
0.1243942695778486 0.4675265111324691 0.4098204972763497  
0.9602452436156526 0.6055485628322614 0.5389181941020524  
0.4800450404907366 0.6375699964627515 0.5379339556313170  
0.1225472187390437 0.1807217560265997 0.9680564652858692  
0.6334329309798861 0.2124077547577699 0.9672426573813908  
0.4479209776887387 0.3505909405727792 0.0955876548085257  
0.9469650055477601 0.3511236102270772 0.0961744894486358  
0.8455216534781087 0.5581974912370455 0.2230390147736685

0.3456611889645416 0.5580782254847776 0.2230337289473496  
0.2442308896611465 0.7720215602105824 0.3507333493559486  
0.7427777820265860 0.7711026905372194 0.3508464876883437  
0.6360399503442551 0.9832028918823355 0.4773597699119421  
0.1191913162367939 0.9540933200327544 0.4812693970444215  
0.0990964574007549 0.7029912771130356 0.9699682232613114  
0.6369401376832897 0.6872573335788985 0.9681968409605872  
0.4763700890688014 0.8712308982699426 0.1000918406509470  
0.9768050277380667 0.8703848317788072 0.1000835526661064  
0.876422246063795 0.0800896855702078 0.2283540439875651  
0.3763876584399029 0.0801276231597825 0.2283287349178380  
0.2744303732521232 0.2912763957299447 0.3558771513047176  
0.7739919426382897 0.2926086551483351 0.3558596738517892  
0.6502035355169440 0.4725023017006365 0.4827392994909872  
0.1217158754239094 0.4573190489172703 0.4799292968564828  
0.5653325449570161 0.1224748398454807 0.5765834802975505  
0.7221570481576691 0.6962682689077155 0.9295435095848887  
0.4482518665681354 0.8705356668316000 0.0527542483745762  
0.9465391565841301 0.8410945212497012 0.0571752516366999  
0.8545866849556703 0.0638654314467928 0.1830727599714095  
0.3541367356513589 0.0644194327859040 0.1830249946382949  
0.2533507176358611 0.2746171577989713 0.3108539625032094  
0.7530035255643952 0.2752211793467083 0.3108537456878082  
0.6462223726687242 0.4803480889579532 0.4384524864661188  
0.1340278062859284 0.4703215188671734 0.4383641849329436  
0.9320269027080528 0.5629616372413935 0.5652431977710464  
0.4991426129319834 0.6667930914421660 0.5645729859382200  
0.1006203035829500 0.1472090241908148 0.9415144863902469  
0.6399360074766633 0.2537436349897533 0.9409666816835838  
0.4346599912061819 0.3374690474641682 0.0674896146603956  
0.9310623272358498 0.3489094587961077 0.0677197373186331  
0.8189973438329616 0.5413310334339130 0.1952066844355898  
0.3194243283528451 0.5405194000181481 0.1952155741994233  
0.2183612318495918 0.7536079766777277 0.3229231631819829  
0.7168192593580258 0.7524958300470459 0.3230195644918155  
0.6256364089301130 0.9784720424425473 0.4486769489360185  
0.1039831781246221 0.9479842828285072 0.4533073282981164  
0.7211608143120571 0.1015767663652696 0.5701900235713921  
0.8993573973669129 0.7159411525330768 0.9357429644023227  
0.7881968592342545 0.5186427353281573 0.0001526992884635  
0.8101573353035363 0.2995418952141122 0.5058799927437647

Mn-top-CONTCAR-O2

1.0000000000000000

5.8948998451000003 0.0000000000000000 0.0000000000000000  
-3.0422965108000000 5.1533943039999999 0.0000000000000000  
0.0000000000000000 0.0000000000000000 36.0000000000000000

Ni O H Mn

18 42 20 2

Direct

0.2871324579903174 0.0194566117314636 0.9976923894572494  
0.7930970990933375 0.0298548811753392 0.9983998942818104  
0.6426103023870624 0.2025432277589445 0.1255418697550681  
0.1423718200133592 0.2022920036435991 0.1251445996064575  
0.3074651252376128 0.2954461607578338 0.5080850593122648  
0.2821193356558638 0.5209157124850350 0.9980903696668051  
0.0416544235100105 0.4117884075735176 0.2530846176915773  
0.5416349613429574 0.4117528105270196 0.2530949772368558  
0.4407956778087438 0.6153253428208885 0.3808590409678345  
0.9410213821989259 0.6154234945157100 0.3807873078878004  
0.8129374316160565 0.7963704485348089 0.5084336286380378  
0.1424856098805733 0.7019035078469145 0.1253081265797675  
0.3083838215051316 0.7863838189940182 0.5077429258705450  
0.6422324501312247 0.7022977983914487 0.1251746576256281  
0.0416038377206220 0.9118036156037448 0.2530863547429973  
0.5416680628058472 0.9118464279754264 0.2530727200024288  
0.4407836294592187 0.1155766085767880 0.3810226239691303  
0.9412034538245919 0.1156777861553024 0.3808590791905999  
0.4598031546078403 0.3463756719034663 0.0229225936976150  
0.9488018577703485 0.3585847016012664 0.0266410051973054  
0.8022309073187870 0.5307529265429096 0.1502390992847538  
0.3030981889269739 0.5296029920212320 0.1501347224177323  
0.2016517971648710 0.7388624590663397 0.2777585835576488  
0.7014333175029037 0.7387294614598261 0.2778214044360610  
0.6024841868437392 0.9453234519725484 0.4061924128400065  
0.1006475992106814 0.9419076885492572 0.4060398083511672  
0.9573056311882766 0.1147867604210688 0.5345204224945377  
0.4863216166300433 0.1284648535748545 0.5385786664306735  
0.4528227899665040 0.8671758928739379 0.0257987613849124  
0.9348596885248597 0.8359476870193490 0.0278775562539266  
0.8335312982889320 0.0498191068584433 0.1553179219605099  
0.3330071906966481 0.0505779266405426 0.1552333066898228  
0.2324259314981987 0.2604971243217662 0.2830743094181187  
0.7324268748735250 0.2605706221313540 0.2830755701043302  
0.6311960101592717 0.4638222904509561 0.4107003587206535  
0.1313084649004139 0.4636995109875102 0.4098163763370053  
0.9757465166444490 0.6030779305325922 0.5394653156193314  
0.4966969062157247 0.6427725839553204 0.5376303744389048  
0.1260223868044292 0.1736020826341260 0.9684446265327438  
0.6429776476448339 0.2119194382519822 0.9668704785878930  
0.4529090782237262 0.3539223885236069 0.0955022701182813  
0.9519881946661641 0.3540273173131752 0.0963603150589449  
0.8508519160170422 0.5629691237127616 0.2231142153812939

0.3510125377457101 0.5628621349330487 0.2230961766522768  
0.2510122815904765 0.7683412370757452 0.3508329409269351  
0.7494070213318409 0.7671974874953307 0.3510035555702800  
0.6444218689131560 0.9801344410077846 0.4780856952339576  
0.1314203605623092 0.9485499451597690 0.4803821716850436  
0.1155857445409296 0.7012803320979870 0.9715014517531273  
0.6312229176426811 0.6858097721901544 0.9675690374725434  
0.4817077158558334 0.8749371991067250 0.1001858079233671  
0.9811543874003448 0.8730747111181287 0.0999854520835797  
0.8819400304371356 0.0850156216840219 0.2283896420804865  
0.3819043530374273 0.0850417240180974 0.2283595321217859  
0.2810052049094836 0.2870803995388300 0.3559894690793541  
0.7802668632214562 0.2883820892639761 0.3559886672833628  
0.6630731737557412 0.4689548994612665 0.4833482080547356  
0.1412955245971190 0.4580969890982587 0.4794790271372662  
0.5025488471646398 0.1407450157907704 0.5754322050737599  
0.6313110238812101 0.6711008020115727 0.9307263874190852  
0.4598444152775016 0.8779928322009027 0.0538842731517875  
0.9471486859002596 0.8414048470157951 0.0564305770858269  
0.8599193829930059 0.0671871809441953 0.1831305370991387  
0.3590928406050580 0.0684143133296686 0.1830504586672603  
0.2589725579427693 0.2759184832668069 0.3108984109399060  
0.7585616271262339 0.2765732617645611 0.3109055485982424  
0.6538637740752122 0.4751285688996987 0.4386486426647096  
0.1448048276555340 0.4677951669576004 0.4384241770508197  
0.9678307122313896 0.5669805881420658 0.5659588737800050  
0.5279760139538041 0.6824521366146357 0.5639812959933082  
0.1112789127288352 0.1350203674071366 0.9420198716640016  
0.6631375495942464 0.2487514241001350 0.9403338788865838  
0.4408057922307762 0.3408677060944569 0.0674386771431941  
0.9379204315244820 0.3493327889344684 0.0678028283187260  
0.8244296063272500 0.5458145957088902 0.1952853594127859  
0.3248461347355018 0.5448619784726318 0.1952781432002411  
0.2249891968052680 0.7528340011882904 0.3230162822863960  
0.7230832262039542 0.7513302058799027 0.3231768108649575  
0.6323535418758013 0.9762717340976934 0.4494826875611366  
0.1126585193862866 0.9385904054171945 0.4523577346016836  
0.8003738078098550 0.5193055389018397 0.9991995572604182  
0.8268685639588327 0.2962763282220280 0.5069694114208829

Mn-top-CONTCAR-0-OH

1.0000000000000000

5.8948998451000003 0.0000000000000000 0.0000000000000000  
-3.0422965108000000 5.1533943039999999 0.0000000000000000  
0.0000000000000000 0.0000000000000000 36.0000000000000000

Ni O H Mn

18 40 22 2

Direct

0.2783500033890481 0.0162552706762043 0.9982195785568049  
0.7839372006202829 0.0232246745260523 0.9990190273768023  
0.6379793526900726 0.2018324124336085 0.1257754122841330  
0.1381867840183974 0.2016192960837954 0.1253044474585552  
0.3048078040465830 0.2972312330986754 0.5087884806615042  
0.2768681280859634 0.5211934485015296 0.9977998962757334  
0.0400610496659697 0.4110559755606641 0.2532626078635883  
0.5400606449791979 0.4110416349264030 0.2532787922096135  
0.4391944039418934 0.6195121775286007 0.3811311096092989  
0.9393066974604387 0.6197371144636904 0.3809009867988647  
0.8090833309205001 0.8023157773924630 0.5081347229067180  
0.1380502007253608 0.7010147545845178 0.1255980878411930  
0.3070845289737439 0.7948225949212766 0.5075443079143936  
0.6378144345925092 0.7014795246086053 0.1253988753748560  
0.0400658144501200 0.9110323013823526 0.2532770867123544  
0.5401071267688931 0.9110490299046420 0.2532479708516127  
0.4391828809911931 0.1201931127821297 0.3811709197848607  
0.9395881818977443 0.1201894977908087 0.3809236313643234  
0.4531882214685558 0.3401967987137229 0.0236464183760356  
0.9359426521424835 0.3614381816186251 0.0261548987501114  
0.7978518608821440 0.5297881250441410 0.1504871532030694  
0.2988423245716246 0.5288692095222987 0.1503245445941249  
0.2000819367831741 0.7381558130512320 0.2779444799852456  
0.6999145360016464 0.7380838624368723 0.2779828406699586  
0.6012559044450095 0.9500065850420868 0.4062238146644848  
0.0986029329077681 0.9465164687760083 0.4060719805561485  
0.9480706504904556 0.1170395303057879 0.5356018005781485  
0.4421280209061981 0.8645265042419794 0.0262089641424836  
0.9296359124491173 0.8315399521755629 0.0288044385378713  
0.8298039943225971 0.0498409683329224 0.1554737121805551  
0.3287597513623744 0.0498883850696224 0.1555260325667274  
0.2308595388664975 0.2600422021852363 0.2832722982564518  
0.7307938529912361 0.2600686463716104 0.2832511988298976  
0.6303700168788169 0.4683927437705558 0.4108547102511264  
0.1290742612435892 0.4674466648424520 0.4101721588340423  
0.9731243719982080 0.6049476327293862 0.5402782761076258  
0.4960353611074509 0.6466812760199757 0.5379902713594165  
0.1216451767687937 0.1716583537592629 0.9684791587005828  
0.6364158021612454 0.2097664648571792 0.9668182637879902  
0.4484178751805104 0.3527499898777134 0.0957676130262044  
0.9471407818461162 0.3536494106129296 0.0964006267601947  
0.8492105069162188 0.5621011435926591 0.2232765466626158  
0.3493010203158233 0.5619647194351118 0.2232601004880667

0.2493200373980844 0.7721859038778692 0.3510232630609384  
0.7473631693828114 0.7711013122664836 0.3511108664799699  
0.6454242512096290 0.9867665554570675 0.4775663997127718  
0.1259304844827676 0.9538772812590454 0.4803173105427045  
0.1041332933374918 0.7012663741417670 0.9707473955221498  
0.4769588371673697 0.8743551040621876 0.1005151922034914  
0.9770606856608578 0.8719363978236135 0.1002916845006661  
0.8803026819912805 0.0840775518508576 0.2285714556840821  
0.3801688148731370 0.0841126811860381 0.2285644712845427  
0.2795763212873654 0.2917441905945528 0.3561790819192880  
0.7787930751685971 0.2926928154093434 0.3561117036433616  
0.6655949082891356 0.4776488809682582 0.4830609997162340  
0.1279825819681974 0.4572361835476405 0.4803552123279313  
0.4840371899081729 0.1321192543376128 0.5376481588781220  
0.6246816918816772 0.6844391200022700 0.9689527725316074  
0.4485120142337631 0.8761769647728547 0.0542238418259625  
0.9441998755104257 0.8361257655214522 0.0574071251001473  
0.8569869576675818 0.0672304191523246 0.1832722001611770  
0.3556058335991438 0.0677229440344600 0.1833347907990057  
0.2575298872989504 0.2772752554696961 0.3110871377162573  
0.7570394427400757 0.2776577521539609 0.3110792648068364  
0.6554371987010608 0.4813357068558397 0.4388528529499079  
0.1376405690380913 0.4696310909864671 0.4387185589694837  
0.9955036818674134 0.5694350648194485 0.5658900543776528  
0.5460165241440772 0.6975736224897261 0.5636411090520849  
0.1085643107999968 0.1194057158250367 0.9427076879147238  
0.6715508783549015 0.2432657243421970 0.9404856720867917  
0.4366187858191206 0.3373979646295235 0.0676126944728192  
0.9295374980229557 0.3509248810328357 0.0679987039511659  
0.8219319361982548 0.5449386332607764 0.1954595967719817  
0.3225012433105050 0.5441146532736585 0.1954586604317250  
0.2232693004036556 0.7549223501454726 0.3232157999031859  
0.7208072620723427 0.7534270539945701 0.3232955890022706  
0.6356084995942972 0.9840094881873725 0.4488780065290792  
0.1061533156298467 0.9438483303184068 0.4523398051472058  
0.5054376651483447 0.1310615942174561 0.5642996658875765  
0.6443477340527000 0.6864398050726093 0.9422425375532546  
0.7909306974974077 0.5195593601646868 0.9993535378528344  
0.8197650160629794 0.2984506899436499 0.5072011200146374

Mn-top-CONTCAR-0-O

1.0000000000000000

5.8948998451000003 0.0000000000000000 0.0000000000000000  
-3.0422965108000000 5.1533943039999999 0.0000000000000000  
0.0000000000000000 0.0000000000000000 36.0000000000000000

Ni O H Mn

18 40 20 2

Direct

0.2693718516464330 0.0074461054322370 0.9975478250353191  
0.7700970022922604 0.0071954763140312 0.9981062038360093  
0.6452739463188450 0.1989154622214500 0.1252963403827536  
0.1455471605174381 0.1989257493078185 0.1252059824526484  
0.3207476459966259 0.3022155952439576 0.5088442548535426  
0.2711674603499361 0.5124706203782310 0.9974222609956982  
0.0437747989384150 0.4112175992390803 0.2531805191701366  
0.5436933431504798 0.4111662180791882 0.2531764437862734  
0.4451562243164844 0.6168662405951508 0.3810713848712552  
0.9454636757145707 0.6169452588379727 0.3809880119954627  
0.8218299081826999 0.8075023303752218 0.5081521255843100  
0.1453292355840006 0.6985059110049932 0.1253212295154214  
0.3225606325230004 0.8073161004569087 0.5087023612519630  
0.6447362098651865 0.6982206781971527 0.1254211726600190  
0.0437587770400185 0.9112365620711316 0.2531779785517401  
0.5437263844869520 0.9112406369306214 0.2531708188422002  
0.4453024927540881 0.1172573896377642 0.3809784920151316  
0.9458708208627229 0.1175324505178139 0.3808593028444065  
0.4388279000447639 0.3559932820441247 0.0234970931234244  
0.9295237871515880 0.3349631123202670 0.0232429702438992  
0.8048939807972104 0.5253497862282259 0.1501452702924126  
0.3053984890397103 0.5264505329015208 0.1501579718715504  
0.2036872135386076 0.7381234101308252 0.2778666554546092  
0.7036231484429152 0.7380991302703848 0.2778592683962842  
0.6076186364189979 0.9469944311405811 0.4059048120754909  
0.1048786000405002 0.9438833174552954 0.4058261723087213  
0.9770844185385599 0.1277556451000095 0.5343078828843133  
0.4585217673035515 0.8618016721910138 0.0267868785024419  
0.9331556876970311 0.8244638617343512 0.0285386504351166  
0.8368944992360241 0.0477841209026977 0.1553131694578767  
0.3358041331688355 0.0475180546786902 0.1552720752864616  
0.2346896618811840 0.2601724645160033 0.2831967739363463  
0.7346769241157176 0.2601911573811577 0.2832007992635752  
0.6349058013392508 0.4654128164343092 0.4106738977532771  
0.1360189668956693 0.4645885393434241 0.4108442016222682  
0.9805896416785487 0.6135307099989120 0.5393276012546835  
0.5117625865895477 0.6598105668879768 0.5381607700648914  
0.0802154438876173 0.1549234132140569 0.9681011398232542  
0.6114690954699924 0.2011277962991400 0.9669139367319701  
0.4545011314713818 0.3510994388332804 0.0954105395861831  
0.9559294917115508 0.3505166636378902 0.0956149422884423  
0.8529378831193810 0.5620077987156691 0.2231690290329240  
0.3529274636609046 0.5621026163492786 0.2231678126246592

0.2548460384907116 0.7684656263065150 0.3510022815205289  
0.7537902969586625 0.7682455180370624 0.3509634820258327  
0.6586500435051477 0.9902007492073395 0.4777184961862062  
0.1333327722074316 0.9529478901777537 0.4794639204234699  
0.0981194462077752 0.6612107531657898 0.9712484894949398  
0.4858623128643202 0.8719973933661720 0.1004639924473238  
0.9830278447519945 0.8685336025801860 0.1003772217062746  
0.8840607264040017 0.0844882101263167 0.2284993853112169  
0.3839638781432200 0.0844692765314932 0.2284859949211508  
0.2851184438286225 0.2894457727255357 0.3561386199153276  
0.7855054721678982 0.2904495179300781 0.3561530891278437  
0.6623359509403599 0.4796749562868214 0.4830199462728828  
0.1530756527930066 0.4587005155088306 0.4827542242849034  
0.4936683966358544 0.1534634296425281 0.5350212539563159  
0.6147921436288257 0.6868953395970152 0.9719581471368031  
0.4786092358347318 0.8716978295755879 0.0547659474252740  
0.9441111860656619 0.8275041261519718 0.0568951643568525  
0.8632847100966501 0.0667693724089631 0.1831107627766571  
0.3620322050731204 0.0664471253911216 0.1830588151906127  
0.2617630361773138 0.2767335057870781 0.3110043424487756  
0.7617309114277830 0.2770888624785997 0.3110016663760078  
0.6549533102652774 0.4787910486868228 0.4386188911225233  
0.1545262430852645 0.4671498668134006 0.4390868410741859  
0.9601475653958076 0.5843483560037868 0.5659500623030596  
0.5496283690441075 0.6987290238458144 0.5643932583667493  
0.0423815439713451 0.1158306070458508 0.9418702171024549  
0.6320903250856418 0.2303219770697780 0.9402931881724257  
0.4363837166633076 0.3481527639419966 0.0671566382655726  
0.9361973769512204 0.3367740028143942 0.0676701271472666  
0.8265553845237932 0.5428764591735984 0.1953731054148378  
0.3266287043743787 0.5433331559201733 0.1953666829225043  
0.2278610766840146 0.7517688190900742 0.3232076539005106  
0.7266100284675119 0.7514966056598595 0.3231639169650578  
0.6472218084071883 0.9872802561217213 0.4493618111858311  
0.1130100914410974 0.9434430803545908 0.4514918710255387  
0.7739851462073801 0.5157620687989422 0.9978629488264943  
0.8179046534503982 0.2988817381266671 0.5083947509404041



Mn-top-CONTCAR-0-H2O

1.0000000000000000

5.8948998451000003 0.0000000000000000 0.0000000000000000  
-3.0422965108000000 5.1533943039999999 0.0000000000000000  
0.0000000000000000 0.0000000000000000 36.0000000000000000

Ni O H Mn

18 40 24 2

Direct

0.2891616188278704 0.0165506381715405 0.9962061911056446  
0.7876938341320666 0.0158571845012539 0.9969800858016249  
0.6486974984992008 0.2010747702612680 0.1258269686570723  
0.1493862880903933 0.2012237494672175 0.1251562014159501  
0.3132518324150578 0.3011478491368906 0.5092562149201485  
0.2842960701701592 0.5133814574355750 0.9987918168285524  
0.0498468222823444 0.4145395844158106 0.2532605202125228  
0.5497448973450061 0.4145659681194856 0.2532709312081194  
0.4517620365827272 0.6241775465464944 0.3810268214325450  
0.9514129385316967 0.6245582074756071 0.3809580977240242  
0.8130623489902711 0.7987932470470798 0.5101608244030333  
0.1491865576322771 0.7017349406518434 0.1254440177453685  
0.3125651069046300 0.7926402376037157 0.5075643947245534  
0.6490306355530031 0.7014207588438933 0.1253505630281944  
0.0497143655713078 0.9146007880851361 0.2532981842839998  
0.5497368003898478 0.9146051302847173 0.2532505097939078  
0.4518160326894990 0.1244833359028344 0.3811847242035777  
0.9517086278789120 0.1239220278473413 0.3809672780119494  
0.4853151777216539 0.3675321522381461 0.0215394214789875  
0.9497529781311195 0.3440158709970695 0.0268334306319717  
0.8088985964613054 0.5299730985681421 0.1503595600135817  
0.3101210228538255 0.5285661417701488 0.1502888068146270  
0.2096342984090818 0.7415994538938678 0.2779182972221592  
0.7093890209975384 0.7415267458796456 0.2780265341259134  
0.6121423209135288 0.9527978434746378 0.4066268118268535  
0.1129769775621296 0.9523017423093718 0.4060553230618106  
0.9623362268714772 0.1411822090618226 0.5388511513671711  
0.4593771475940117 0.8516068568464255 0.0251108198869632  
0.9456807776825089 0.8316592268356788 0.0263095990822273  
0.8406505031096091 0.0490797457672593 0.1555091130144065  
0.3387228539655779 0.0497526131497599 0.1553768533031298  
0.2407703500583361 0.2635492134958089 0.2832659143394130  
0.7406303503205772 0.2634799051497687 0.2832698843093617  
0.6415227838259709 0.4715879408264383 0.4111599897218420  
0.1404916980373521 0.4717683664329551 0.4095423872279544  
0.9758639556268965 0.6023653422384430 0.5405334573295156  
0.4775186592216196 0.6405804251830624 0.5398799127133515  
0.1135964976790260 0.1741169271072487 0.9654874499681263  
0.6474984899701125 0.2259188733189395 0.9646737582253371  
0.4608424792793781 0.3539737741930393 0.0953631681270016  
0.9590985959262360 0.3535882943697299 0.0968232567613855  
0.8587928043187623 0.5654786509926757 0.2232778017281346  
0.3589247078496765 0.5653304409408767 0.2232279474747278

0.2614104747325395 0.7767919849149582 0.3509145424051605  
0.7601094596274842 0.7758425936909396 0.3512299323196292  
0.6555240191968719 0.9835125940758108 0.4794102254378259  
0.1518168483399102 0.9637116632088786 0.4818957331953048  
0.1068347545476858 0.6759183719353696 0.9674487348692510  
0.4890366474062706 0.8737051933045137 0.1005767595541465  
0.9869399062730607 0.8728186708101795 0.0997759937997268  
0.8899269783183068 0.0874957724173818 0.2286014989242210  
0.3897043431152651 0.0876023007921357 0.2285276075634570  
0.2928157856765161 0.2966258738141749 0.3560444931382652  
0.7904402757881611 0.2963406135514703 0.3562000479232206  
0.6602045589930554 0.4461328629425111 0.4845282289292474  
0.1504559666019810 0.4636035664124164 0.4791891832532508  
0.3684212554385218 0.1387447819137750 0.5671991449582143  
0.5532131354001312 0.7275252812420294 0.9462565973965883  
0.4740442722814056 0.8608465420650980 0.0528607198363644  
0.9513389176592671 0.8409145199861677 0.0547801956150275  
0.8676122359899755 0.0676021348636381 0.1832943740758400  
0.3649426485362279 0.0685837089233122 0.1831922424089345  
0.2682760212108279 0.2813289304157616 0.3110833175927948  
0.7672605393823910 0.2810848573299636 0.3110831910198404  
0.6587859331208462 0.4710139457422124 0.4391154119143654  
0.1517892846094299 0.4745098945138560 0.4377641181612533  
0.9894240312194540 0.5294985400814801 0.5640602484713215  
0.4988666153298929 0.6357412537068877 0.5664727309393219  
0.0876296359171438 0.1190568681313359 0.9397545597050228  
0.7583589244117225 0.2655782317224451 0.9427658149265414  
0.4536180644151649 0.3492524918091644 0.0673327083149830  
0.9403147629219116 0.3446570115522336 0.0687600400264468  
0.8318140181126308 0.5471561096168662 0.1954725259052517  
0.3323496830386779 0.5461519813170537 0.1954187829315465  
0.2346505904662617 0.7593845895049076 0.3231176719239128  
0.7329957008541379 0.7579110598120092 0.3234199863836489  
0.6384351472587096 0.9792280401992399 0.4508558284135706  
0.1455451329858445 0.9631039992294215 0.4541033618012645  
0.1878252718932084 0.1206848754573286 0.5642170104870946  
0.3350635511300399 0.9669737153771255 0.5739241923664142  
0.3703359929976975 0.7102123341321741 0.9464408583108077  
0.5290476326683117 0.5627758282851296 0.9373179881121775  
0.8151569309228175 0.5094628239094242 0.0002907760206937  
0.8444204563366593 0.3064541914506189 0.5057778434113704

Mn-top-CONTCAR-0-0

1.0000000000000000

5.8948998451000003 0.0000000000000000 0.0000000000000000  
-3.0422965108000000 5.1533943039999999 0.0000000000000000  
0.0000000000000000 0.0000000000000000 36.0000000000000000

Ni O H Mn

18 38 20 2

Direct

0.2835265940330061 0.0196397799160266 0.9949589971502277  
0.7944334769390764 0.0317724828033121 0.9997344913671000  
0.6447110139468535 0.2000832373719845 0.1256599071810314  
0.1457249064873523 0.2006516440636474 0.1250889047934862  
0.2964895623489454 0.2964545529911078 0.5093666319174517  
0.2731645326762404 0.5198714053561275 0.9966702716034845  
0.0430982620186953 0.4120409593172525 0.2531208170786883  
0.5430435598633636 0.4120105944465635 0.2531049758121142  
0.4421471849132246 0.6161873108394431 0.3807721369916450  
0.9416853256366835 0.6165952129432242 0.3808825609644373  
0.8055884551998389 0.7956040953103027 0.5108022890235517  
0.1454404334307213 0.7008638972531784 0.1254261276740962  
0.3047591893218495 0.7851713378011169 0.5065058645539438  
0.6451839066590495 0.7006680181918625 0.1252128091816331  
0.0431222711611881 0.9121270776884387 0.2531122712854312  
0.5430796996615186 0.9120609152069150 0.2530841895109575  
0.4419541484672180 0.1162066560030368 0.3810140222633578  
0.9419955237614062 0.1158076727624433 0.3807581233455792  
0.4716751419672676 0.3762584128104436 0.0201476343577625  
0.9507395486363635 0.3591763659841050 0.0277193557098201  
0.8045368314281873 0.5289696431995878 0.1502523966335829  
0.3066414874574548 0.5277299859517086 0.1502626173191999  
0.2030890870796540 0.7392227190039833 0.2777537372645185  
0.7028668385814711 0.7389688993695245 0.2778721765943573  
0.6024893817324113 0.9448204112693830 0.4063901718024852  
0.1034492196666861 0.9443494370320096 0.4059312102562629  
0.9541511504186175 0.1407786819805281 0.5377698766013950  
0.4554184560102144 0.8563482967199718 0.0243625169709247  
0.9426861767560482 0.8378251169964983 0.0266130718592166  
0.8363781211767218 0.0478863299047418 0.1554247576620043  
0.3351164358958982 0.0493486891561261 0.1551924959813960  
0.2340234511510175 0.2607759305365605 0.2830958145878313  
0.7337282736378725 0.2607222376802198 0.2831086236632459  
0.6309931551418870 0.4632976719309809 0.4112033858559272  
0.1309714435347260 0.4638606140918284 0.4091772711734691  
0.9720287743005400 0.6027177227720131 0.5398374222305407  
0.4679880253423789 0.6349947770926789 0.5401080905978191  
0.1081229074634464 0.1807953955743358 0.9657366734204729  
0.6422697797894159 0.2105467432800552 0.9666060043547944  
0.4564561461124939 0.3539865477457766 0.0949824356332485  
0.9557389912367498 0.3531262135795714 0.0970234089748772  
0.8522850585924928 0.5631547740593419 0.2231446827289076  
0.3524207700859634 0.5630062608605400 0.2231330351076934

0.2518687702023783 0.7689905200431184 0.3507290058404919  
0.7507630330934134 0.7676799866772370 0.3510619009951981  
0.6475704579392101 0.9788547455351662 0.4790593288037428  
0.1430368886274422 0.9590806837558077 0.4818870805049613  
0.0896073816545879 0.6741038795368723 0.9680873907617027  
0.4844509042674403 0.8720844993122654 0.1003809500865174  
0.9835682695738868 0.8723807323870645 0.0996965671593060  
0.8834132981830720 0.0851848166275246 0.2284609764357910  
0.3833572890482912 0.0852986896777495 0.2283117202692040  
0.2831766067227122 0.2884104818535675 0.3558671247569976  
0.7804355257189783 0.2885993542096017 0.3560596486815371  
0.6424965543693446 0.4391045164136500 0.4857872810633594  
0.1403338719157148 0.4578393622135977 0.4785002162921899  
0.4625455945490060 0.8544262155089868 0.0521508012593941  
0.9502971137270961 0.8439109080455367 0.0551672503950371  
0.8624349478618427 0.0659069757752846 0.1832283808343789  
0.3609665924920193 0.0680078993875242 0.1830269678350334  
0.2608929655661711 0.2766269975099291 0.3109346655513363  
0.7595691747934552 0.2768725854819039 0.3109419431316880  
0.6457783711704650 0.4642900928704705 0.4390975187079889  
0.1425972326100435 0.4668513235354723 0.4374158369861689  
0.0092868544726556 0.5522464294899549 0.5637216519563921  
0.4793517595181100 0.6528323156504428 0.5668666250118690  
0.0921260466057632 0.1669019766924436 0.9389617043898326  
0.7243564091714916 0.2648098657268676 0.9423099301830931  
0.4445250095699933 0.3524602382483053 0.0670702770799423  
0.9396857666078233 0.3505626591348587 0.0688635503234565  
0.8260066860809445 0.5451371157261278 0.1953161548797269  
0.3267523044693945 0.5441305977677402 0.1952938310614414  
0.2259957814179216 0.7536051034009787 0.3229020299962997  
0.7246749731666782 0.7513859438479358 0.3232148861560731  
0.6307061536780125 0.9740761565726501 0.4505258264859222  
0.1378640258043760 0.9606528497529183 0.4540785181501334  
0.8061518989902439 0.5129523165883043 0.0004877470032056  
0.8357727836377933 0.3021063551936294 0.5055506599305915

Mn-sub-CONTCAR-OOH

1.0000000000000000

5.8948998451000003 0.0000000000000000 0.0000000000000000  
-3.0422965108000000 5.1533943039999999 0.0000000000000000  
0.0000000000000000 0.0000000000000000 36.0000000000000000

Ni O H Mn

18 42 22 2

Direct

0.2918570346002936 0.0086669518940659 0.9983015977753400  
0.7952545893619190 0.0223240656221879 0.9983375009412453  
0.1564230363913946 0.2160660829030224 0.1253154364347250  
0.2850273091454868 0.2950120223816743 0.5086190857718207  
0.2866746757955654 0.5091885370596860 0.9989805781544382  
0.0450130216736900 0.4334888548255843 0.2528198332360387  
0.5448102379969955 0.4334530379550015 0.2529796511611648  
0.4281966377519091 0.6167665500325333 0.3808786633318483  
0.9285096158276457 0.6171921131082091 0.3809319897683814  
0.7904795314933573 0.7933289235187441 0.5084288565520879  
0.1561429068630049 0.7154257518584515 0.1256144081343647  
0.2880573697569860 0.7844275494199756 0.5073910243714250  
0.8022341272578849 0.5183826078750726 0.9999711814599845  
0.6563241535220401 0.7155607855800860 0.1255043313378559  
0.0449519003754145 0.9334531123910960 0.2526402986751378  
0.5444945667223124 0.9328449116335921 0.2529737104954906  
0.4283082140107038 0.1175912197696731 0.3809622718691330  
0.7959885797384859 0.2931648231971686 0.5061746100139987  
0.4636280929600750 0.3332123467289356 0.0235216738852717  
0.9507750994013235 0.3531551073197725 0.0258863569596549  
0.8163658624890879 0.5400840177278367 0.1515757367552695  
0.3276348873025386 0.5607140142624528 0.1508002389873878  
0.2046526359224977 0.7604641981664070 0.2778770138933756  
0.7070418807510868 0.7631401601275337 0.2779378933320328  
0.5974680080076675 0.9640520076973772 0.4071361335188458  
0.0854751528404136 0.9431446008247888 0.4070801805124120  
0.9253981874634721 0.1127982890430772 0.5346888409594481  
0.4693448739587698 0.1106126195460287 0.5361593757053209  
0.4658467104428723 0.8460651484199889 0.0272667568373761  
0.9732207271814659 0.8642717913970920 0.0278984830982151  
0.8195092166408255 0.0684953699504620 0.1557761385295118  
0.3446727034300703 0.0673108223166935 0.1558555032111761  
0.2355210553616639 0.2799090982848055 0.2825419542430482  
0.7353681377456466 0.2813594373729330 0.2825921255868055  
0.6172306801633912 0.4672988292289025 0.4099345088748644  
0.0897682381001292 0.4299153536065092 0.4108253044593487  
0.9746961745327812 0.6354414782567199 0.5386738236275848  
0.4695355187393919 0.6280372328346701 0.5380794147027154  
0.1222300294417648 0.1793028498807098 0.9678992181910152  
0.5984405891690139 0.1549605857688527 0.9643577516251934  
0.4945160776679486 0.3620974308822227 0.0951186892541398  
0.9677410736665647 0.3661524231807325 0.0954672130808542  
0.8537673015518569 0.5848137192910787 0.2233264097630456

0.3544494127534947 0.5851935811609891 0.2230329930608016  
0.2404672313632168 0.7685534161733951 0.3518635421351631  
0.7662010081982662 0.8043376668412677 0.3505377659495814  
0.6046937659326093 0.9454610459279330 0.4780717599218779  
0.1139074576300810 0.9554598951066149 0.4804012387593571  
0.1241051934496675 0.6886153374425437 0.9734413058612316  
0.6309244734842731 0.6698949537926573 0.9709473755690508  
0.4953958766109018 0.8911684323667250 0.0997059058655570  
0.9853653603255633 0.8704244627487930 0.1002528132520952  
0.8826806279691102 0.1057492180249867 0.2277370080374528  
0.3851191484777697 0.1050992375057334 0.2278695965594701  
0.2592005352490865 0.2698800333880041 0.3545333000334174  
0.7714806940135914 0.2920002612688353 0.3548670573747206  
0.6440919864794344 0.4705362060210385 0.4828866497477632  
0.1192070880702463 0.4661255370871338 0.4803237401976043  
0.5469620719225355 0.0929384875549416 0.5735500617206952  
0.6344916138223834 0.6330763122296769 0.9311303413690676  
0.4767160989578075 0.8613220565764949 0.0551706093595252  
0.9838882403178517 0.8670347627734177 0.0562122605751951  
0.8377622078455050 0.0889969595373410 0.1839642590428922  
0.3669403938353219 0.0855898365173142 0.1840467720626792  
0.2555110321149271 0.2806397507335604 0.3106263030650529  
0.7584323040249036 0.2934256805085967 0.3104843443239494  
0.6400617443900256 0.4766668583380974 0.4381385446683323  
0.0949622307616899 0.4367772272956854 0.4399339478869772  
0.0037625856691913 0.6525366791441162 0.5653413289433717  
0.4854959135149819 0.6493174753655315 0.5648447543690608  
0.1116852646209236 0.1742821180161458 0.9410193916874812  
0.5470644723207631 0.0484274269914508 0.9420169835545128  
0.4857992279384702 0.3427427566945287 0.0665542510736126  
0.9527231866059888 0.3602350118365096 0.0662927235750940  
0.8302307206640687 0.5636670183205110 0.1953966455456374  
0.3361180219441392 0.5735763354906878 0.1947606252920694  
0.2178303089186074 0.7604873416598233 0.3239792626861057  
0.7524028211029196 0.8021299447225658 0.3223870380112519  
0.5934855004316388 0.9467623926180513 0.4496263410368271  
0.0982969001516431 0.9458061935283468 0.4524437374843152  
0.7183066367364050 0.0955034950033778 0.5663683187865099  
0.6376404682469521 0.4691277259321946 0.9313860628661729  
0.6571380067143610 0.2164964623106083 0.1254660980618998  
0.9291557692012812 0.1183174723013167 0.3808953605481373

Mn-sub-CONTCAR-O2

1.0000000000000000

5.8948998451000003 0.0000000000000000 0.0000000000000000  
-3.0422965108000000 5.1533943039999999 0.0000000000000000  
0.0000000000000000 0.0000000000000000 36.0000000000000000

Ni O H Mn

18 42 20 2

Direct

0.3057550215987574 0.0146359661044386 0.9976561157518491  
0.8100506770839031 0.0231131333977699 0.9983148952896443  
0.1512629104391265 0.2068988142445156 0.1250705547707595  
0.2914172377445663 0.2877048672531590 0.5082804505098296  
0.2987783054389839 0.5158881663553797 0.9983836607833709  
0.0411092517512897 0.4235963380361695 0.2528439420847063  
0.5411127682673205 0.4235460296020874 0.2529558318763717  
0.4316290099737660 0.6105849155995963 0.3811398447052960  
0.9351251554466801 0.6109806781719460 0.3811911604366284  
0.7963551547216745 0.7894093762950719 0.5087848083247697  
0.1514111516286009 0.7041327349899587 0.1252080670392461  
0.2916939294192386 0.7802729539761103 0.5076554616071205  
0.8121010838045728 0.5159672824104931 0.9979622754318292  
0.6520944255935749 0.7053498586626192 0.1251401251498132  
0.0410174733213690 0.9236390952535362 0.2527051170084213  
0.5407260413012775 0.9234014005993553 0.2529598475475867  
0.4340734119643468 0.1125110705819342 0.3810277766087025  
0.8049433186323703 0.2882298857774310 0.5082333004725148  
0.4682992009872276 0.3401727774059581 0.0227957583679424  
0.9669436338069634 0.3487370258686236 0.0265882262367368  
0.8121208415124157 0.5329076388458699 0.1512713026147953  
0.3216131822093860 0.5445453117907078 0.1502092866866169  
0.2013627948436169 0.7506170740539114 0.2778122583158063  
0.7029809704508300 0.7529844992865605 0.2779324782108403  
0.6028424403340127 0.9576497989496477 0.4072553326756027  
0.0935220674469121 0.9392057987732474 0.4070759735344150  
0.9518763880919109 0.1083538271301058 0.5344729799400673  
0.4536478515592586 0.1198243429986774 0.5400458314986379  
0.4767333919477483 0.8478220850796031 0.0265722125853169  
0.9792588865715914 0.8576931688810464 0.0262872037268718  
0.8128603534262266 0.0553931526886507 0.1559424189986713  
0.3357601374831727 0.0580473948895171 0.1549133431870953  
0.2317009291574350 0.2707779817208614 0.2825604796899637  
0.7313910339734724 0.2716952131187007 0.2826215664616552  
0.6227202387730817 0.4619850317027132 0.4102879705899746  
0.0976070448885934 0.4234787914210850 0.4098774001951543  
0.9652630759235303 0.6118297446933447 0.5391416051594146  
0.4763529155157067 0.6347197113311944 0.5382779384148492  
0.1386381040639602 0.1870902132267340 0.9674624150208638  
0.6310071585385144 0.1735151283925683 0.9678156951815775  
0.4925807291430060 0.3535184218965359 0.0946091023403393  
0.9652842125744800 0.3526989423051741 0.0965310616311228  
0.8505358649899316 0.5749039981384524 0.2232572829051814

0.3510223302092619 0.5749427849164225 0.2230002173629674  
0.2463568833106825 0.7643564564157486 0.3516617641035426  
0.7667186420000377 0.7938951579569741 0.3512062610584661  
0.6247898851541326 0.9629742942229009 0.4796847945006784  
0.1165378136437851 0.9418228006549056 0.4803036379783582  
0.1484219537336481 0.6996728121691153 0.9717584411420502  
0.6453216916833167 0.6834385987555509 0.9663296329622951  
0.4921466715743599 0.8796056852963636 0.0994604312980767  
0.9835440009065184 0.8670341345026070 0.1001900230846082  
0.8787278911784948 0.0962162411665126 0.2278092130626372  
0.3804120844404285 0.0952509636765187 0.2277906960852888  
0.2673642832714551 0.2686043643620533 0.3545085841768720  
0.7741015460542704 0.2858954071435409 0.3548384724215874  
0.6390642690187264 0.4614561388927416 0.4839988898803814  
0.1360962959315347 0.4536884334177674 0.4795248056547591  
0.4463423134132699 0.1230577165025830 0.5761583191135157  
0.6434468476713014 0.6780770809748692 0.9302143380172683  
0.4820207180146707 0.8549061866891490 0.0545434119302020  
0.9861454469212750 0.8634750343576143 0.0543289701688023  
0.8317396303063082 0.0768791018836266 0.1840922571864872  
0.3553787284397413 0.0761517510360324 0.1829976864729871  
0.2550439980347783 0.2753293549332304 0.3105697888273177  
0.7558368018302841 0.2844575981126367 0.3105105407701133  
0.6400417497397999 0.4684726820066693 0.4384685961749418  
0.1226081333594447 0.4378682948027272 0.4508224682880762  
0.9783044623407935 0.6030825666289185 0.5659238493551724  
0.5035735830488474 0.6638830344528335 0.5648472862178051  
0.1286693171247894 0.1859475803462664 0.9405520297185075  
0.6087424823716393 0.1515751737247802 0.9410941270270183  
0.4870324977411039 0.3418966952587091 0.0658345663314924  
0.9629854535033877 0.3485618490004292 0.0552688275462145  
0.8268188469374165 0.5549050470843313 0.1953726611171503  
0.3307102595277807 0.5591471051002700 0.1950153100190325  
0.2215628970459612 0.7544868832245027 0.3238231502272553  
0.7473482564673370 0.7878533534850306 0.3232157708338812  
0.6183763873340837 0.9691182353378385 0.4515138077167952  
0.1016059178617129 0.9340083015906903 0.4522825069947020  
0.6591713292164760 0.2096278904975597 0.1248386683831845  
0.9371079352926945 0.1185074805179766 0.3811550202215118



Mn-sub-CONTCAR-0-OH

1.0000000000000000

5.8948998451000003 0.0000000000000000 0.0000000000000000  
-3.0422965108000000 5.1533943039999999 0.0000000000000000  
0.0000000000000000 0.0000000000000000 36.0000000000000000

Ni O H Mn

18 40 22 2

Direct

0.2937201110546184 0.0008907797976363 0.9987299055198449  
0.7977489851518555 0.0108880281098891 0.9988001052824060  
0.1595616191992164 0.2122481331293216 0.1251083488004809  
0.2859723204258486 0.2886925787474581 0.5082222851970783  
0.2904232205823547 0.5043230296149659 0.9988454361849648  
0.0471329604047384 0.4310949689181029 0.2527544859675217  
0.5468554271217130 0.4309950325842138 0.2528946414853124  
0.4264264584036823 0.6130707858899385 0.3809617027580217  
0.9266778098406974 0.6131955144511423 0.3811687796622678  
0.7911171998377782 0.7941658742788746 0.5084834322502658  
0.1588810090978754 0.7111218702658491 0.1255369185407389  
0.2869413198105377 0.7832220813217248 0.5083150164371091  
0.7995139635248947 0.5069986179420738 0.9988456751552448  
0.6591433911663955 0.7111581101158677 0.1253872956307873  
0.0471158431361118 0.9310675587681914 0.2525921312233166  
0.5465507543887824 0.9303492669412350 0.2529032267070193  
0.4269588406809106 0.1138921729473168 0.3808980933898809  
0.7941015360369050 0.2908013273280474 0.5086921725162696  
0.4654604213793618 0.3262501319535147 0.0239357549930119  
0.9488339522166456 0.3445955439711099 0.0257149315020939  
0.8196205058239698 0.5363576666029743 0.1514379511144668  
0.3300589455974503 0.5560619512852085 0.1506921147938485  
0.2067787179005478 0.7580324523339783 0.2778496411506950  
0.7089766194695386 0.7606927929762364 0.2778557969183524  
0.5969494725722981 0.9613880513328255 0.4069861225888687  
0.0836091361669418 0.9391686766112954 0.4068757007170021  
0.9595144592847120 0.1136569920730821 0.5343006802449963  
0.4672785192129894 0.8358557358709930 0.0276891424416021  
0.9788475856022387 0.8562667747595967 0.0278506704021311  
0.8228795452374413 0.0646193044265502 0.1555977111158171  
0.3475476287420136 0.0635037419100186 0.1557417169971913  
0.2374860036216404 0.2776870642752058 0.2824603383282991  
0.7373388510230257 0.2789925012093306 0.2825212893817337  
0.6136905128243058 0.4634803310346030 0.4099973777019699  
0.0883489481696316 0.4240056303678372 0.4112309219077588  
0.9586294344292199 0.6199549458919478 0.5399361991425877  
0.4782893937174961 0.6428210391163276 0.5396410743104809  
0.1270661820411547 0.1765132803903597 0.9675247256538668  
0.6063125986852995 0.1520943732966842 0.9673577242314622  
0.4976145721790388 0.3579757051803938 0.0949673407452281  
0.9701373754961367 0.3613810531170998 0.0951893359929272  
0.8560043142884552 0.5822628193740158 0.2232517929040867  
0.3566138302708239 0.5825015577239157 0.2229421170809047

0.2388352521937378 0.7637922872153737 0.3520103939976806  
0.7645899146618902 0.8003436212180901 0.3505058902724372  
0.6173524036849756 0.9604543504094067 0.4793821118383903  
0.1064965618514293 0.9384787068553138 0.4796304975410806  
0.1244325861006743 0.6818361253857930 0.9728307227794346  
0.4977562661522441 0.8865403576862860 0.0997295131285298  
0.9889648853080146 0.8667654182233804 0.1001945013627150  
0.8848089699901465 0.1033070751286758 0.2276748341680914  
0.3874052686915661 0.1026126343136013 0.2278057919835419  
0.2581677796712967 0.2667801052304739 0.3544482846439010  
0.7700847980239374 0.2889074407069572 0.3549721735345059  
0.6232673987081299 0.4698140741992631 0.4833575421573855  
0.1320628154119987 0.4473559721095270 0.4814334661539732  
0.4454456815732044 0.1269218661439950 0.5367733217948967  
0.6394834409917891 0.6685116479736593 0.9704784325078677  
0.4765757825286343 0.8508422146022454 0.0556115671675599  
0.9919112154849898 0.8618988654686746 0.0561096609893923  
0.8409126030900609 0.0857063368291691 0.1837592435403437  
0.3694736938619556 0.0823634796537362 0.1839121726514392  
0.2567676039276208 0.2785466921963646 0.3105634480777155  
0.7594122476627945 0.2909977720972279 0.3104080779519478  
0.6279700151727710 0.4733399931039841 0.4382602827439470  
0.1012754347094500 0.4199533359917638 0.4401730521731793  
0.9715463331174377 0.6187166380991656 0.5667397244873271  
0.5215528429015635 0.6852239487974003 0.5656435655706034  
0.1145890183600784 0.1787513589740470 0.9407206083111959  
0.5619593626647941 0.1090035930348776 0.9413928542129213  
0.4892465480147905 0.3384842054087969 0.0662047284777003  
0.9529611228104642 0.3541930238610362 0.0658273670841680  
0.8328318773301646 0.5606903750947936 0.1953289535539682  
0.3382022884254496 0.5700120102325670 0.1946889498620124  
0.2169920467932229 0.7554716805990722 0.3241093194352587  
0.7516816187726647 0.7981945188619903 0.3223521480462352  
0.6096763184156302 0.9626890008061935 0.4513159394986843  
0.0881495018261802 0.9317068039679484 0.4517349583710057  
0.4284793837923075 0.1403118087899955 0.5633590601102725  
0.6572147614815265 0.6565579152309198 0.9438784007517711  
0.6602662771207051 0.2127406655846897 0.1252825199920409  
0.9274877679024414 0.1145361326766690 0.3808283190049551

Mn-sub-CONTCAR-0-O

1.0000000000000000

5.8948998451000003 0.0000000000000000 0.0000000000000000  
-3.0422965108000000 5.1533943039999999 0.0000000000000000  
0.0000000000000000 0.0000000000000000 36.0000000000000000

Ni O H Mn

18 40 20 2

Direct

0.2756453301866715 0.9922023559760790 0.9988822429469191  
0.7758989897911127 0.9922601883323858 0.9988299965507719  
0.1579778330670216 0.2115716275372496 0.1253567332250790  
0.3102035140963761 0.2913579484761443 0.5087995155249510  
0.2778533260969970 0.4983467864542774 0.9983127358991902  
0.0473741754321235 0.4290020550451919 0.2525822324486637  
0.5469657352974643 0.4289800640470984 0.2527154578076013  
0.4336024637850635 0.6115046160852224 0.3806846151652460  
0.9334994396243024 0.6115254048630208 0.3807035597178171  
0.8118691211353128 0.7971770722461938 0.5081564895178998  
0.1578367635172223 0.7112178645511905 0.1255166559930273  
0.3119456202622002 0.7970485810453573 0.5080977206224453  
0.7780875816015671 0.4989836612988005 0.9981046318838463  
0.6577608205379718 0.7112256423434364 0.1255119353300592  
0.0471880665935053 0.9288176501560703 0.2523924594525037  
0.5465808026689135 0.9280278511213330 0.2527196940674311  
0.4335790713030413 0.1117839930304130 0.3806044186319633  
0.8096121266705897 0.2910977665712455 0.5089576046396782  
0.4392302614467919 0.3227527129676648 0.0228279560369248  
0.9361292565884424 0.3225793369294387 0.0227129544981447  
0.8183984534084153 0.5351525776330944 0.1513698281736142  
0.3290574073884578 0.5571493283470422 0.1508335950447714  
0.2066618595714213 0.7559123364821593 0.2776453337372316  
0.7094007045362513 0.7589161154720692 0.2777000924857270  
0.6031604057506915 0.9600696168116696 0.4068854452213909  
0.0912004783389966 0.9375506776130534 0.4062825727897483  
0.9702153040474624 0.1174945332476812 0.5332264572005597  
0.4646646404614276 0.8440943347313795 0.0283856030142059  
0.9649864261843162 0.8441097578070115 0.0287489782661731  
0.8201946054609990 0.0644698266593904 0.1556677002259120  
0.3473304771268527 0.0632695497861337 0.1558216918324688  
0.2381121317032088 0.2755256279012693 0.2822978178636150  
0.7374647764957779 0.2764679722801591 0.2823440949578688  
0.6226990020304327 0.4626579067510546 0.4098060468945043  
0.0956025530676111 0.4240571390541961 0.4112586134096451  
0.0014237985404752 0.6467490784346310 0.5390706784968196  
0.5006742752305687 0.6461240218511884 0.5390245712383854  
0.0874864961559993 0.1443628345572525 0.9680204482365415  
0.5866737370168430 0.1434847737008527 0.9678093766144317  
0.4957389516223121 0.3584911929763637 0.0949985048633071  
0.9686263628838426 0.3596227246546638 0.0948701821480414  
0.8555401459984093 0.5797567193150961 0.2230935297428217  
0.3565178138341931 0.5807873261434759 0.2227645146514395

0.2441129521971078 0.7603499820466597 0.3516165791433584  
0.7718298380041426 0.7997050673767148 0.3501948602474771  
0.6227534390104996 0.9463191148104125 0.4784733841190579  
0.1235243998968292 0.9455966330683140 0.4785201159918377  
0.1173478118304721 0.6717913404498963 0.9738329414820484  
0.4970492803391560 0.8872611336343101 0.0996472024912928  
0.9864220214725313 0.8650651817386660 0.1002117361927524  
0.8849035099669453 0.1010522564485455 0.2274871603230053  
0.3873980580898009 0.1002952231127772 0.2276169691573476  
0.2640621127934583 0.2635322011308064 0.3542807364352787  
0.7761031407740481 0.2860813781273966 0.3549418155798972  
0.6514011386742303 0.4676452773792834 0.4842257658420961  
0.1486885164012549 0.4650213328350913 0.4842167215951272  
0.4699218049041348 0.1177372665837087 0.5332227367119885  
0.6176358580998547 0.6720216085098047 0.9738367684739987  
0.4856649014048841 0.8648846129043212 0.0563924938678209  
0.9805263442259500 0.8535178771223374 0.0572187677982725  
0.8386066126674195 0.0850434077407342 0.1838734906608299  
0.3700658313522725 0.0811383527236212 0.1840553397954043  
0.2593163300150046 0.2756001755917176 0.3103541250991054  
0.7607617761981983 0.2882223486069857 0.3101469731124574  
0.6443740567753344 0.4695533589511016 0.4377129653236180  
0.1068953680465513 0.4254822642461532 0.4394687952530754  
0.0396688270441937 0.6882070394013483 0.5652377820601207  
0.5379722594891944 0.6861603891869396 0.5652369517277747  
0.0506967639651892 0.1067360429487443 0.9417523691007252  
0.5482618167651382 0.1030099997445513 0.9416272193530754  
0.4803438000875522 0.3391511858557387 0.0667391562408806  
0.9484292637771088 0.3421834029604301 0.0666032458511258  
0.8318855405259470 0.5583899656875491 0.1951637538108603  
0.3380832852644106 0.5702105974786181 0.1943963789387066  
0.2198713291844946 0.7533397240414549 0.3237681678745005  
0.7572300450584929 0.7981468735109771 0.3220425190503050  
0.6044546924109523 0.9467869018407599 0.4503327590608097  
0.1029999564362399 0.9344591723906541 0.4506436269726293  
0.6580062766371413 0.2116847413047774 0.1253608428692133  
0.9337699056562481 0.1120873432194089 0.3806417263227295

Mn-sub-CONTCAR-0-H2O

1.0000000000000000

5.8948998451000003 0.0000000000000000 0.0000000000000000  
-3.0422965108000000 5.1533943039999999 0.0000000000000000  
0.0000000000000000 0.0000000000000000 36.0000000000000000

Ni O H Mn

18 40 24 2

Direct

0.3237679929437912 0.0199841523034539 0.9973111114400456  
0.8250320463794342 0.0242568211615177 0.9978449936393298  
0.1558862499334053 0.2108507709179497 0.1256309149293825  
0.2881147355580820 0.2918205481646706 0.5054663642802132  
0.3180601572544740 0.5195322555651309 0.0014612961819851  
0.0434212969715912 0.4321756994446688 0.2530781994062573  
0.5434610752367918 0.4322148827825446 0.2533969221213424  
0.4361459544683280 0.6164263136752829 0.3807756929144175  
0.9392158045339187 0.6168051436526485 0.3809848869433728  
0.7947434179705957 0.7843953089752261 0.5094294931470920  
0.1560158706111976 0.7089309699941473 0.1255941682241199  
0.2846306959479528 0.7756076674883170 0.5073204996043044  
0.8369696807504654 0.5174787211284375 0.9993174278181136  
0.6564358698979089 0.7097474814676462 0.1254296423981077  
0.0433534219623396 0.9323101066614383 0.2531951798172347  
0.5432495099967738 0.9322805938491192 0.2533477434668818  
0.4379044278529000 0.1177568491121544 0.3812251086854853  
0.7963193648198931 0.2822648107803387 0.5083762060912983  
0.4888889932174388 0.3403873175254251 0.0232392085509631  
0.9876957028697234 0.3427618245606957 0.0280467442845361  
0.8166082334229763 0.5377443584752517 0.1517719632299600  
0.3262917599863281 0.5485674405932808 0.1504577908887869  
0.2039169702550030 0.7592269986262327 0.2780407507106935  
0.7045681999367520 0.7613870309064410 0.2785118215406686  
0.6068953308227020 0.9412060698653275 0.4076252077682173  
0.0870489420074653 0.9407934185122178 0.4072517805499296  
0.9658741950788160 0.0965635840781113 0.5369068203263951  
0.4886808025121978 0.8667383913018658 0.0260101243261155  
0.9780971110696240 0.8464090668689873 0.0260879868020586  
0.8155724056599958 0.0581125480041361 0.1565901988919527  
0.3390892355643839 0.0629896990987206 0.1553838269933975  
0.2340348513987852 0.2809340692826499 0.2828193095752942  
0.7347505800669750 0.2807441035409545 0.2829967745730030  
0.6247285848601714 0.4626316940287613 0.4099119534146181  
0.1132166641298868 0.4373499569196769 0.4088826769961168  
0.9525855832117440 0.6115930286771442 0.5395021211375315  
0.4556724828340096 0.6189429975308489 0.5392648986492337  
0.1600529558650411 0.1698558629793974 0.9665573686314823  
0.6714277303766597 0.2040633320514717 0.9663404068327891  
0.4988214281984941 0.3573515519856460 0.0949473790764597  
0.9706055346874071 0.3551924570553603 0.0976344282381140  
0.8524367118579382 0.5838268232273539 0.2236741268304443  
0.3538522076558002 0.5839300138295140 0.2233047291727348

0.2528943316732024 0.7764243275435819 0.3515913914557680  
0.7618766679223434 0.7936826607572401 0.3511836661052788  
0.6251821364456097 0.9463878417922634 0.4814472691742517  
0.1282894297280082 0.9510225640006590 0.4801320748998482  
0.1715243626801015 0.7097581919149872 0.9698063355046663  
0.4969382167595727 0.8857537911864845 0.0996785564522117  
0.9871555762900392 0.8712195419773158 0.1006825354777879  
0.8812371149456544 0.1044677717989133 0.2282437410121364  
0.3828086830069377 0.1040684245393546 0.2281804959973119  
0.2703935848590799 0.2951204381917239 0.3544569954491727  
0.7876571086403985 0.2945320561534233 0.3545716001300470  
0.6322199045098816 0.4660463670667105 0.4829930304425466  
0.1221745062353151 0.4535981535739393 0.4786555001932257  
0.4015016737243964 0.1159139892597348 0.5604802062492784  
0.5895817897267865 0.7156136366542146 0.9484093265908589  
0.4935674766437729 0.8823984018066509 0.0539449436457256  
0.9750573792620668 0.8504127528012069 0.0540020042207172  
0.8344450229586401 0.0806809571829314 0.1847430697330475  
0.3578910958693544 0.0827247307167475 0.1835077953955071  
0.2565597235828580 0.2953547000337713 0.3109429505063390  
0.7635832495790631 0.2933115905753976 0.3109720808842378  
0.6396178183931174 0.4760330650942411 0.4382219823069676  
0.1209229891808335 0.4476392111644684 0.4502403542596780  
0.9302681140971377 0.5951842697591481 0.5662058648861296  
0.4536247019463639 0.5766027851110995 0.5653007192040189  
0.1171155471901851 0.0877922918855815 0.9422339503995212  
0.7052077467347647 0.2066045148272272 0.9399494217954326  
0.4978501860981794 0.3427028202856310 0.0660926744459281  
0.9769995064484245 0.3405844863647666 0.0564100747595946  
0.8292108976342064 0.5627141784300265 0.1957891337020917  
0.3343509578018303 0.5666421867218652 0.1953529520723150  
0.2274601229825655 0.7634655543959264 0.3237789870572010  
0.7386438587755506 0.7874452522320488 0.3230308917030257  
0.6199666221656648 0.9414427338930952 0.4533323845292612  
0.1130384077761415 0.9439993713868030 0.4519556294108759  
0.2109072097072002 0.0763284562192148 0.5589683932352115  
0.3996482338015301 0.9632337770806658 0.5703754690337861  
0.4161507831580424 0.7213114230722690 0.9494070746901777  
0.5386084864549242 0.5391746005474699 0.9408714155475786  
0.6634889806802089 0.2138281443506097 0.1255247581185484  
0.9396190152939073 0.1227851320004841 0.3811262682222897

Mn-sub-CONTCAR-0-0

1.0000000000000000

5.8948998451000003 0.0000000000000000 0.0000000000000000  
-3.0422965108000000 5.1533943039999999 0.0000000000000000  
0.0000000000000000 0.0000000000000000 36.0000000000000000

Ni O H Mn

18 38 20 2

Direct

0.3233212221879753 0.0215129064026987 0.9970249595230130  
0.8296570205084413 0.0342459565465693 0.0001263368997204  
0.1577930088372136 0.2085472040888803 0.1251944902727786  
0.2731784455768022 0.2823222999759726 0.5070143742318715  
0.3115410089917265 0.5208208995921144 0.9995456372158176  
0.0373682114719042 0.4237807918526099 0.2528072666793434  
0.5373917153951095 0.4236985076052180 0.2529104154683743  
0.4232101376976597 0.6079087404620294 0.3808802465840351  
0.9261170965236558 0.6083239709897669 0.3810680862209692  
0.7839090924847854 0.7814558578017313 0.5094028456206444  
0.1579745712428948 0.7065388299276641 0.1252375846447709  
0.2768524948429929 0.7674672329701420 0.5057891907007956  
0.8361536750487911 0.5201128405535203 0.9992371187943490  
0.6584358575774391 0.7075525987085858 0.1250420378175688  
0.0374727438367416 0.9238615369758061 0.2526798272515167  
0.5371090383941786 0.9235380458713209 0.2529219538354849  
0.4251398212215686 0.1095140837283371 0.3810518200863223  
0.7978078446030614 0.2821801015638159 0.5073865276759313  
0.4879296509054711 0.3483510336657042 0.0218799172159514  
0.9879073994058732 0.3537320244901937 0.0285287579848505  
0.8169542173869671 0.5347177080614637 0.1514329559517148  
0.3288894481205626 0.5484781716666169 0.1502630947757703  
0.1973639813223469 0.7507553408397923 0.2777695837815161  
0.6992418816697170 0.7531395554774213 0.2779093475025862  
0.5938899357556380 0.9544049529021408 0.4072798736684636  
0.0855144348055470 0.9374358546084004 0.4071563756905039  
0.9395405748704373 0.0950286293733212 0.5358064010383015  
0.4904512516690440 0.8601320350408844 0.0260885108673251  
0.9864486423036791 0.8558850420080795 0.0260821690124218  
0.8182825324233760 0.0567456123840735 0.1560167772435863  
0.3412570935497631 0.0588433654584455 0.1549343493903005  
0.2275816690738851 0.2707350563460190 0.2824890336463909  
0.7270918088705836 0.2713732520191939 0.2825361820193857  
0.6139569223859610 0.4599644770508457 0.4103131658065970  
0.0880964048110146 0.4208843831221000 0.4091435926904979  
0.9560974103946317 0.6125093551196812 0.5394091410362085  
0.4542568463970240 0.6212390791809492 0.5385309120518373  
0.1547901671682199 0.1848496209037798 0.9674091966513115  
0.6613229431412455 0.1876495791233415 0.9673399801614609  
0.4993759413552792 0.3553181472313018 0.0945659720472137  
0.9725854433400607 0.3561531922320308 0.0972199377640029  
0.8471699056411724 0.5752832797097127 0.2232851163522374  
0.3478661335613071 0.5754228844663392 0.2230122545315124

0.2374971667583969 0.7616967138137239 0.3515235329820737  
0.7584589876623217 0.7907890817132015 0.3510415268262986  
0.6144416668737699 0.9501260571477576 0.4800426294143512  
0.1118326601956405 0.9411399918079848 0.4805905527825790  
0.1667554916093922 0.7084144978998792 0.9706720007148237  
0.4995070007924223 0.8829135976734348 0.0991631002628426  
0.9890079191193456 0.8670109330554545 0.0999856442530721  
0.8755178543382700 0.0963317974125532 0.2277914221345048  
0.3769397455443325 0.0953339196677841 0.2277333595193457  
0.2587507245389570 0.2651249040699583 0.3543920363827058  
0.7635022281599226 0.2816669676028646 0.3547245489415259  
0.6244010189765115 0.4541346863893955 0.4848750383497361  
0.1196570432798116 0.4461274673839294 0.4777185804087762  
0.4929606932271399 0.8672015039200542 0.0542107725699032  
0.9858390672764046 0.8557330490621747 0.0542503286062333  
0.8341965105514131 0.0768653260111653 0.1842358165270334  
0.3582719398648134 0.0762617509591419 0.1830845319999025  
0.2497904667129454 0.274177768570448 0.3105224088027002  
0.7495375862476109 0.2827875376711044 0.3104693776863181  
0.6302986214726950 0.4662246856470406 0.4384398084757220  
0.1073892234631816 0.4324740583817950 0.4489350600542925  
0.9743969134231080 0.6137825663284839 0.5661721431117833  
0.4712171549013049 0.6400466697834413 0.5652976728215018  
0.1434120283493525 0.1712447426458495 0.9405676802471198  
0.6594228266449722 0.1807939308000641 0.9404434199263013  
0.4983511201380028 0.3450931969067672 0.0659534586384747  
0.9793388003721744 0.3521415680481159 0.0572909211255539  
0.8255841244684261 0.5555701112367629 0.1953462962330575  
0.3306711685176101 0.5609110194985831 0.1949766722290245  
0.2140911094479533 0.7532411115376534 0.3236638506274149  
0.7403835810234726 0.7854109894336434 0.3230068543476716  
0.6085064099910550 0.9569570277618588 0.4518628191502294  
0.1010183578276012 0.9384708900572641 0.4524454285258755  
0.6649670280417482 0.2114290280126576 0.1250741630614125  
0.9276201104161625 0.1148067247027971 0.3809134318545783
